# Supplementary material for: Synthesis of 2-trifluoromethylquinolines through rhodium-catalysed redox-neutral [3 + 3] annulation between anilines and CF3-ynones using traceless directing groups
Source: Royal Society of Chemistry journal article supplement (doi:10.1039/d1qo01478a), 2021-11-29
Supplement: d1qo01478a1.pdf [file d1qo01478a1.pdf]

## Supporting information

# Synthesis of 2-trifluoromethylquinolines through rhodium-catalysed redox-neutral [3+3] annulation between anilines and CF<sub>3</sub>-ynones using traceless directing group

Haichao Huang, Hailong Wang, Chao Gong, Zhenjing Zhuang, Wenmin Feng, Si-Hai Wu\* and Lianhui Wang\*

School of Medicine, Huaqiao University, Quanzhou, 362021, P. R. China

*E-mail: wusihai@hqu.edu.cn; E-mail: lianhui.wang@hqu.edu.cn*

## Table of Contents

|                                                      |     |
|------------------------------------------------------|-----|
| 1. General information.....                          | S2  |
| 2. Optimization of reaction conditions.....          | S2  |
| 3. General catalytic procedure.....                  | S3  |
| 4. Characterization of compounds 3, 5 and 10.....    | S4  |
| 5. Experiments with scale-up reaction.....           | S23 |
| 6. Intermolecular competition experiments.....       | S24 |
| 7. Deuterium-labeling experiments.....               | S25 |
| 8. NMR spectra of compounds 3, 5 and 10.....         | S26 |
| 9. X-ray crystallographic analysis.....              | S83 |
| 10. Photophysical data of compounds 3oa and 3pa..... | S85 |
| 11. References.....                                  | S86 |

## 1. General information

All reactions were performed using flame-dried glassware under an atmosphere of dry Nitrogen, and all commercial materials and solvents were used directly without further purification, unless otherwise noted. Column chromatography was performed on silica gel (70-230 mesh ASTM) using the reported eluents. Analytical thin layer chromatography was performed on 0.25 mm silica gel 60-F254. Visualization was carried out with UV light. Melting points were determined in open glass capillaries and were uncorrected.  $^1\text{H}$  NMR spectra were recorded on a Bruker Avance III instrument (500 MHz).  $^{13}\text{C}$  NMR spectra were recorded on a Bruker Avance III instrument (126 MHz) and were fully decoupled by broad band proton decoupling.  $^{19}\text{F}$  NMR spectra were recorded on a Bruker Avance III instrument (471 MHz). NMR spectra were recorded in  $\text{CDCl}_3$ . All NMR spectra were referenced to the solvent peaks ( $^1\text{H}$  NMR: residual  $\text{CDCl}_3 = 7.26$  ppm,  $^{13}\text{C}$  NMR:  $\text{CDCl}_3 = 77.16$  ppm). Chemical shifts ( $\delta$ ) are reported in ppm, and coupling constants ( $J$ ) are reported in hertz (Hz). Multiplicities are reported using the following abbreviations: s = singlet, d = doublet, t = triplet, q = quartet, m = multiplet. High-resolution mass spectra (HRMS) were recorded on an Agilent 1290 mass spectrometer using ESI-TOF (electrospray ionization time-of-flight). Crystal structure and data were recorded on an Agilent Gemini E diffractometer. Fluorescence spectra were recorded with a F-7000 fluorescence spectrometer (Hitachi, Japan). Acetanilides,<sup>1</sup> *N*-phenylpivalamide,<sup>2</sup> *t*-Butyl phenylcarbamate,<sup>3</sup> and trifluoromethyl ynones<sup>4</sup> were synthesized according to the previously reported procedure.

## 2. Optimization of reaction conditions

**Table S1.** Optimization of reaction conditions<sup>a</sup>

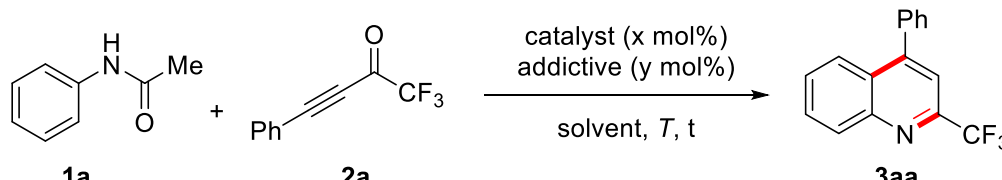

| Entry | Catalyst (x)                                        | Additive (y)           | Solvent | $T$ ( $^{\circ}\text{C}$ ) | t (h) | <b>3aa</b> (%) <sup>b</sup> |
|-------|-----------------------------------------------------|------------------------|---------|----------------------------|-------|-----------------------------|
| 1     | $[\text{IrCp}^*\text{Cl}_2]_2$ (2.0)                | $\text{AgSbF}_6$ (8.0) | DCE     | 100                        | 3     | trace                       |
| 2     | $[\text{Cp}^*\text{Co}(\text{CO})\text{I}_2]$ (4.0) | $\text{AgSbF}_6$ (8.0) | DCE     | 100                        | 3     | 52                          |
| 3     | $[\text{RuCl}_2p\text{-cymene}]_2$ (2.0)            | $\text{AgSbF}_6$ (8.0) | DCE     | 100                        | 3     | 17                          |
| 4     | $\text{Pd}(\text{OAc})_2$ (4.0)                     | ---                    | DCE     | 100                        | 3     | 0                           |
| 5     | $[\text{RhCp}^*\text{Cl}_2]_2$ (2.0)                | $\text{AgSbF}_6$ (8.0) | DCE     | 100                        | 3     | 94                          |
| 6     | $[\text{RhCp}^*\text{Cl}_2]_2$ (1.0)                | $\text{AgSbF}_6$ (4.0) | DCE     | 100                        | 3     | 45                          |

|    |                                                                 |                          |                |     |    |    |
|----|-----------------------------------------------------------------|--------------------------|----------------|-----|----|----|
| 7  | [RhCp*Cl <sub>2</sub> ] <sub>2</sub> (3.0)                      | AgSbF <sub>6</sub> (12)  | DCE            | 100 | 3  | 96 |
| 8  | [RhCp*Cl <sub>2</sub> ] <sub>2</sub> (2.0)                      | AgOAc (8.0)              | DCE            | 100 | 3  | 27 |
| 9  | [RhCp*Cl <sub>2</sub> ] <sub>2</sub> (2.0)                      | AgOTf (8.0)              | DCE            | 100 | 3  | 86 |
| 10 | [RhCp*Cl <sub>2</sub> ] <sub>2</sub> (2.0)                      | AgNTf <sub>2</sub> (8.0) | DCE            | 100 | 3  | 86 |
| 11 | [RhCp*Cl <sub>2</sub> ] <sub>2</sub> (2.0)                      | AgSbF <sub>6</sub> (8.0) | DMF            | 100 | 3  | 0  |
| 12 | [RhCp*Cl <sub>2</sub> ] <sub>2</sub> (2.0)                      | AgSbF <sub>6</sub> (8.0) | MeCN           | 100 | 3  | 0  |
| 13 | [RhCp*Cl <sub>2</sub> ] <sub>2</sub> (2.0)                      | AgSbF <sub>6</sub> (8.0) | PhMe           | 100 | 3  | 0  |
| 14 | [RhCp*Cl <sub>2</sub> ] <sub>2</sub> (3.0)                      | AgSbF <sub>6</sub> (12)  | <i>t</i> -AmOH | 100 | 3  | 12 |
| 15 | [RhCp*Cl <sub>2</sub> ] <sub>2</sub> (2.0)                      | AgSbF <sub>6</sub> (8.0) | DCE            | 60  | 3  | 86 |
| 16 | [RhCp*Cl <sub>2</sub> ] <sub>2</sub> (2.0)                      | AgSbF <sub>6</sub> (8.0) | DCE            | 80  | 3  | 86 |
| 17 | [RhCp*Cl <sub>2</sub> ] <sub>2</sub> (2.0)                      | AgSbF <sub>6</sub> (8.0) | DCE            | 120 | 3  | 89 |
| 18 | [RhCp*Cl <sub>2</sub> ] <sub>2</sub> (2.0)                      | AgSbF <sub>6</sub> (8.0) | DCE            | 100 | 1  | 93 |
| 19 | [RhCp*Cl <sub>2</sub> ] <sub>2</sub> (2.0)                      | AgSbF <sub>6</sub> (8.0) | DCE            | 100 | 5  | 94 |
| 20 | [RhCp*Cl <sub>2</sub> ] <sub>2</sub> (2.0)                      | AgSbF <sub>6</sub> (8.0) | DCE            | 100 | 12 | 96 |
| 21 | Cp*Rh(MeCN) <sub>3</sub> (SbF <sub>6</sub> ) <sub>2</sub> (4.0) | ---                      | DCE            | 100 | 3  | 93 |

<sup>a</sup> Reaction conditions: **1a** (0.30 mmol), **2a** (0.33 mmol), catalyst (1.0-3.0 mol%), additives (4.0-12 mol%) and solvent (1.0 mL) at 60-120 °C under N<sub>2</sub> atmosphere for 1-12 h. <sup>b</sup> Isolated yields.

### 3. General catalytic procedure

#### General procedure A: rhodium-catalysed [3+3] annulation between acetanilides **1** and CF<sub>3</sub>-ynones **2**

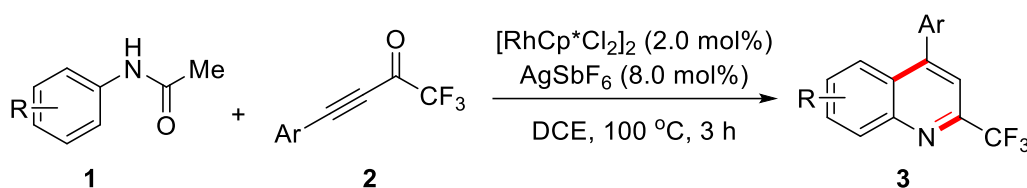

The mixture of acetanilides (**1**, 0.30 mmol, 1.0 equiv), CF<sub>3</sub>-ynones (**2**, 0.33 mmol, 1.1 equiv), [RhCp\*Cl<sub>2</sub>]<sub>2</sub> (3.7 mg, 0.006 mmol) and AgSbF<sub>6</sub> (8.2 mg, 0.024 mmol) in DCE (1.0 mL) was stirred at 100 °C under N<sub>2</sub> for 3 h. After reaction completion, the solvent was removed under reduced pressure and the resulting residue was purified by column chromatography on silica gel with petroleum ether/ethyl acetate (v/v) afforded the corresponding 2-trifluoromethylquinoline products **3**.

#### General procedure B: rhodium-catalysed one-pot [3+3] annulation between anilides **4** and CF<sub>3</sub>-ynones **2**

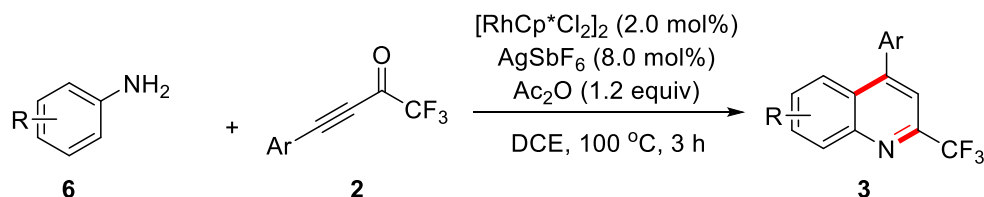

The mixture of anilides (**4**, 0.30 mmol, 1.0 equiv), Ac<sub>2</sub>O (36.8 mg, 0.36 mmol, 1.2 equiv), CF<sub>3</sub>-ynones (**2**, 0.33 mmol, 1.1 equiv), [RhCp\*Cl<sub>2</sub>]<sub>2</sub> (3.7 mg, 0.006 mmol) and AgSbF<sub>6</sub> (8.2 mg, 0.024 mmol) in DCE (1.0 mL) was stirred at 100 °C under N<sub>2</sub> for 3 h. After reaction completion, the solvent was removed under reduced pressure and the resulting residue was purified by column chromatography on silica gel with petroleum ether/ethyl acetate (v/v) afforded the corresponding 2-trifluoromethylquinoline products **3**.

#### 4. Characterization of compounds **3**, **5** and **10**

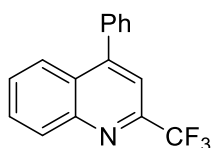

4-Phenyl-2-(trifluoromethyl)quinoline (**3aa**).

The compound (77.3 mg, 94%) was prepared from the general procedure **A** (petroleum ether : ethyl acetate = 100:1→50:1, v/v) as yellow solid; the compound (77.2 mg, 94%) was prepared from the general procedure **B** (petroleum ether : ethyl acetate = 100:1→50:1, v/v) as a yellow solid.

M. p. 59-62 °C.

<sup>1</sup>H NMR (500 MHz, CDCl<sub>3</sub>) δ 8.27 (d, *J* = 8.5 Hz, 1H), 7.96 (d, *J* = 7.9 Hz, 1H), 7.77 (ddd, *J* = 8.4, 6.8, 1.4 Hz, 1H), 7.68 (s, 1H), 7.59-7.45 (m, 6H).

<sup>13</sup>C NMR (126 MHz, CDCl<sub>3</sub>) δ 150.9, 147.8, 147.5 (q, <sup>2</sup>*J*<sub>C-F</sub> = 34 Hz), 137.1, 130.5, 130.4, 129.5, 129.0, 128.8, 128.6, 127.4, 125.8, 121.8 (q, <sup>1</sup>*J*<sub>C-F</sub> = 276 Hz), 117.0 (q, <sup>3</sup>*J*<sub>C-F</sub> = 2 Hz).

<sup>19</sup>F NMR (471 MHz, CDCl<sub>3</sub>) δ -67.3.

HRMS (ESI) *m/z* calcd for C<sub>16</sub>H<sub>11</sub>F<sub>3</sub>N<sup>+</sup> [M+H]<sup>+</sup>: 274.0838, Found 274.0840.

The spectral data were in accordance with those reported in the literature.<sup>5</sup>

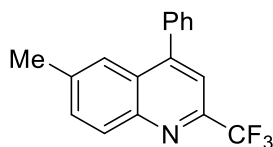

6-Methyl-4-phenyl-2-(trifluoromethyl)quinoline (**3ba**).

The compound (72.9 mg, 84%) was prepared from the general procedure **A** (petroleum ether : ethyl acetate = 100:1→50:1, v/v) as a yellow oil; the compound (71.7 mg, 83%) was prepared from the general procedure **B** (petroleum ether : ethyl acetate = 100:1→50:1, v/v) as a yellow oil.

$^1\text{H}$  NMR (500 MHz,  $\text{CDCl}_3$ )  $\delta$  8.17 (d,  $J = 8.7$  Hz, 1H), 7.75 (s, 1H), 7.65 (s, 1H), 7.62 (dd,  $J = 8.7, 2.1$  Hz, 1H), 7.59-7.49 (m, 5H), 2.49 (s, 3H).

$^{13}\text{C}$  NMR (126 MHz,  $\text{CDCl}_3$ )  $\delta$  150.1, 146.7 (q,  $^2J_{\text{C-F}} = 34$  Hz), 146.5, 139.0, 137.4, 132.9, 130.2, 129.5, 129.0, 128.8, 127.5, 124.6, 122.0 (q,  $^1J_{\text{C-F}} = 276$  Hz), 117.1 (q,  $^3J_{\text{C-F}} = 2$  Hz), 22.0.

$^{19}\text{F}$  NMR (471 MHz,  $\text{CDCl}_3$ )  $\delta$  -67.2.

HRMS (ESI)  $m/z$  calcd for  $\text{C}_{17}\text{H}_{13}\text{F}_3\text{N}^+$   $[\text{M}+\text{H}]^+$ : 288.0995, Found 288.0998.

The spectral data were in accordance with those reported in the literature.<sup>5</sup>

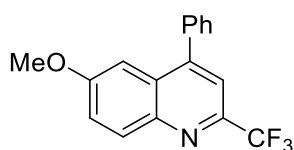

6-Methoxy-4-phenyl-2-(trifluoromethyl)quinoline (**3ca**).

The compound (88.4 mg, 97%) was prepared from the general procedure **A** (petroleum ether : ethyl acetate = 100:1→50:1, v/v) as a yellow solid; the compound (77.0 mg, 84%) was prepared from the general procedure **B** (petroleum ether : ethyl acetate = 100:1→50:1, v/v) as a yellow solid.

M. p. 69-71 °C.

$^1\text{H}$  NMR (500 MHz,  $\text{CDCl}_3$ )  $\delta$  8.18 (d,  $J = 9.2$  Hz, 1H), 7.65 (s, 1H), 7.61-7.53 (m, 5H), 7.47 (dd,  $J = 9.3, 2.8$  Hz, 1H), 7.24 (d,  $J = 2.8$  Hz, 1H), 3.82 (s, 3H).

$^{13}\text{C}$  NMR (126 MHz,  $\text{CDCl}_3$ )  $\delta$  159.5, 149.1, 145.2 ( $^2J_{\text{C-F}} = 35$  Hz), 143.9, 137.5, 131.9, 129.3, 129.0, 129.0, 128.8, 123.4, 122.0 ( $^1J_{\text{C-F}} = 276$  Hz), 117.4 ( $^3J_{\text{C-F}} = 2$  Hz), 103.4, 55.5.

$^{19}\text{F}$  NMR (471 MHz,  $\text{CDCl}_3$ )  $\delta$  -67.0.

HRMS (ESI)  $m/z$  calcd for  $\text{C}_{17}\text{H}_{13}\text{F}_3\text{NO}^+$   $[\text{M}+\text{H}]^+$ : 304.0944, Found 304.0948.

The spectral data were in accordance with those reported in the literature.<sup>5</sup>

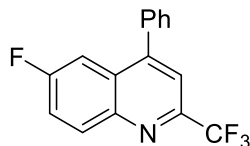

6-Fluoro-4-phenyl-2-(trifluoromethyl)quinoline (**3da**).

The compound (79.4 mg, 90%) was prepared from the general procedure **A** (petroleum ether : ethyl acetate = 100:1→50:1, v/v) as a pale yellow solid; the compound (77.5 mg, 88%) was

prepared from the general procedure **B** (petroleum ether : ethyl acetate = 100:1→50:1, v/v) as a pale yellow solid.

M. p. 94-95 °C.

$^1\text{H}$  NMR (500 MHz,  $\text{CDCl}_3$ )  $\delta$  8.29 (dd,  $J = 8.6, 5.7$  Hz, 1H), 7.70 (s, 1H), 7.64-7.54 (m, 5H), 7.51 (dd,  $J = 7.6, 1.7$  Hz, 2H).

$^{13}\text{C}$  NMR (126 MHz,  $\text{CDCl}_3$ )  $\delta$  161.5 (d,  $^1J_{\text{C-F}} = 249$  Hz), 150.6, 150.5, 147.2 (q,  $^2J_{\text{C-F}} = 35$  Hz), 145.0, 136.8, 133.3 (d,  $^3J_{\text{C-F}} = 10$  Hz), 129.4, 129.1, 128.7 (d,  $^3J_{\text{C-F}} = 10$  Hz), 121.7 (q,  $^1J_{\text{C-F}} = 275$  Hz), 121.2 (d,  $^2J_{\text{C-F}} = 27$  Hz), 117.7 (q,  $^3J_{\text{C-F}} = 2$ ), 109.5 (d,  $^2J_{\text{C-F}} = 24$  Hz).

$^{19}\text{F}$  NMR (471 MHz,  $\text{CDCl}_3$ )  $\delta$  -67.4, -108.9

HRMS (ESI)  $m/z$  calcd for  $\text{C}_{16}\text{H}_{10}\text{F}_4\text{N}^+$   $[\text{M}+\text{H}]^+$ : 292.0744, Found 292.0746.

The spectral data were in accordance with those reported in the literature.<sup>5</sup>

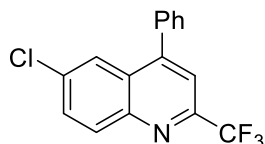

6-Chloro-4-phenyl-2-(trifluoromethyl)quinoline (**3ea**).

The compound (66.0 mg, 71%) was prepared from the general procedure **A** (petroleum ether : ethyl acetate = 100:1→50:1, v/v) as a pale yellow solid.

M. p. 88-90 °C.

$^1\text{H}$  NMR (500 MHz,  $\text{CDCl}_3$ )  $\delta$  8.19 (d,  $J = 9.0$  Hz, 1H), 7.95 (d,  $J = 2.2$  Hz, 1H), 7.74-7.69 (dd, 9.0, 2.3 Hz, 2H), 7.60-7.48 (m, 5H).

$^{13}\text{C}$  NMR (126 MHz,  $\text{CDCl}_3$ )  $\delta$  150.2, 147.8 (q,  $^2J_{\text{C-F}} = 35$  Hz), 146.2, 136.5, 135.0, 132.1, 131.6, 129.5, 129.4, 129.1, 128.1, 124.8, 121.6 (q,  $^1J_{\text{C-F}} = 275$  Hz), 117.9 (q,  $^3J_{\text{C-F}} = 2$  Hz).

$^{19}\text{F}$  NMR (471 MHz,  $\text{CDCl}_3$ )  $\delta$  -67.5.

HRMS (ESI)  $m/z$  calcd for  $\text{C}_{16}\text{H}_{10}\text{ClF}_3\text{N}^+$   $[\text{M}+\text{H}]^+$ : 308.0448, Found 308.0451.

The spectral data were in accordance with those reported in the literature.<sup>6</sup>

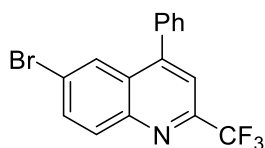

6-Bromo-4-phenyl-2-(trifluoromethyl)quinoline (**3fa**).

The compound (91.5 mg, 86%) was prepared from the general procedure **A** (petroleum ether : ethyl acetate = 100:1→50:1, v/v) as a yellow solid.

M. p. 83-83 °C.

<sup>1</sup>H NMR (500 MHz, CDCl<sub>3</sub>) δ 8.14 (d, *J* = 9.1 Hz, 2H), 7.87 (dd, *J* = 8.9, 2.2 Hz, 1H), 7.70 (s, 1H), 7.61-7.55 (m, 3H), 7.53-7.47 (m, 2H).

<sup>13</sup>C NMR (126 MHz, CDCl<sub>3</sub>) δ 150.2, 148.0 (q, <sup>2</sup>*J*<sub>C-F</sub> = 35 Hz), 146.5, 136.5, 134.3, 132.2, 129.5, 129.5, 129.1, 128.6, 128.2, 123.4, 121.6 (q, <sup>1</sup>*J*<sub>C-F</sub> = 274 Hz), 117.9 (q, <sup>3</sup>*J*<sub>C-F</sub> = 2 Hz).

<sup>19</sup>F NMR (471 MHz, CDCl<sub>3</sub>) δ -67.5.

HRMS (ESI) *m/z* calcd for C<sub>16</sub>H<sub>10</sub>BrF<sub>3</sub>N<sup>+</sup> [M+H]<sup>+</sup>: 351.9943, Found 351.9944.

The spectral data were in accordance with those reported in the literature.<sup>5</sup>

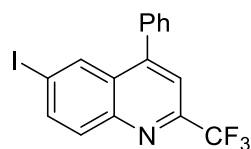

6-Iodo-4-phenyl-2-(trifluoromethyl)quinoline (**3ga**).

The compound (104.3 mg, 87%) was prepared from the general procedure **A** (petroleum ether : ethyl acetate = 100:1→50:1, v/v) as a yellow solid.

M. p. 100-102 °C.

<sup>1</sup>H NMR (500 MHz, CDCl<sub>3</sub>) δ 8.35 (d, *J* = 1.8 Hz, 1H), 8.04 (dd, *J* = 8.9, 1.9 Hz, 1H), 7.98 (d, *J* = 8.9 Hz, 1H), 7.68 (s, 1H), 7.61-7.55 (m, 3H), 7.54-7.48 (m, 2H).

<sup>13</sup>C NMR (126 MHz, CDCl<sub>3</sub>) δ 149.9, 148.0 (q, <sup>2</sup>*J*<sub>C-F</sub> = 35 Hz), 146.8, 139.5, 136.5, 134.8, 132.0, 129.5, 129.4, 129.1, 129.0, 121.6 (q, <sup>1</sup>*J*<sub>C-F</sub> = 275 Hz), 117.8 (q, <sup>3</sup>*J*<sub>C-F</sub> = 2 Hz), 95.4.

<sup>19</sup>F NMR (471 MHz, CDCl<sub>3</sub>) δ -67.5.

HRMS (ESI) *m/z* calcd for C<sub>16</sub>H<sub>10</sub>F<sub>3</sub>IN<sup>+</sup> [M+H]<sup>+</sup>: 399.9805, Found 399.9807.

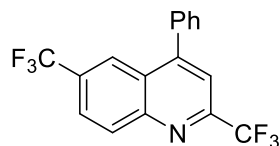

4-Phenyl-2,6-bis(trifluoromethyl)quinoline (**3ha**).

The compound (82.7 mg, 80%) was prepared from the general procedure **A** (petroleum ether : ethyl acetate = 100:1→50:1, v/v) as a white solid. The compound (70.0 mg, 68%) was prepared from the general procedure **B** (petroleum ether : ethyl acetate = 100:1→50:1, v/v) as a white solid.

M. p. 99-101 °C.

<sup>1</sup>H NMR (500 MHz, CDCl<sub>3</sub>) δ 8.41 (d, *J* = 8.9 Hz, 1H), 8.33 (s, 1H), 8.00 (dd, *J* = 8.9, 1.9 Hz, 1H), 7.80 (s, 1H), 7.65-7.59 (m, 3H), 7.58-7.49 (m, 2H).

<sup>13</sup>C NMR (126 MHz, CDCl<sub>3</sub>) δ 152.4, 149.7 (q, <sup>2</sup>*J*<sub>C-F</sub> = 34 Hz), 148.9, 136.3, 132.0, 130.5 (q, <sup>2</sup>*J*<sub>C-F</sub> = 33 Hz), 129.8, 129.6, 129.3, 126.7, 126.4, 124.1 (q, <sup>3</sup>*J*<sub>C-F</sub> = 5 Hz), 123.9 (q, <sup>1</sup>*J*<sub>C-F</sub> = 274 Hz), 123.7 (q, <sup>1</sup>*J*<sub>C-F</sub> = 276 Hz), 118.3.

<sup>19</sup>F NMR (471 MHz, CDCl<sub>3</sub>) δ -62.7, -67.8.

HRMS (ESI) *m/z* calcd for C<sub>17</sub>H<sub>10</sub>F<sub>6</sub>N<sup>+</sup> [M+H]<sup>+</sup>: 342.0712, Found 342.0713.

The spectral data were in accordance with those reported in the literature.<sup>7</sup>

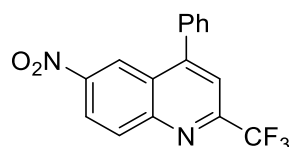

6-Nitro-4-phenyl-2-(trifluoromethyl)quinoline (**3ia**).

The compound (90.7 mg, 94%) was prepared from the general procedure **A** (petroleum ether : ethyl acetate = 100:1→30:1, v/v) as a light yellow solid.

M. p. 173-175 °C.

<sup>1</sup>H NMR (500 MHz, CDCl<sub>3</sub>) δ 8.93 (d, *J* = 2.5 Hz, 1H), 8.56 (dd, *J* = 9.3, 2.5 Hz, 1H), 8.43 (d, *J* = 9.3 Hz, 1H), 7.84 (s, 1H), 7.66-7.61 (m, 3H), 7.58-7.53 (m, 2H).

<sup>13</sup>C NMR (126 MHz, CDCl<sub>3</sub>) δ 153.6, 150.8 (q, <sup>2</sup>*J*<sub>C-F</sub> = 35 Hz), 149.8, 147.1, 135.7, 132.6, 130.1, 129.6, 129.5, 126.7, 124.1, 123.0, 121.2 (q, <sup>1</sup>*J*<sub>C-F</sub> = 275 Hz), 118.7 (q, <sup>3</sup>*J*<sub>C-F</sub> = 2 Hz).

<sup>19</sup>F NMR (471 MHz, CDCl<sub>3</sub>) δ -67.9.

HRMS (ESI) *m/z* calcd for C<sub>16</sub>H<sub>10</sub>F<sub>3</sub>N<sub>2</sub>O<sub>2</sub><sup>+</sup> [M+H]<sup>+</sup>: 319.06689, Found 319.0691 .

The spectral data were in accordance with those reported in the literature.<sup>5</sup>

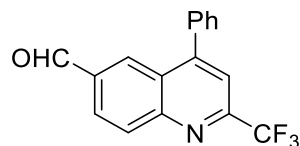

4-Phenyl-2-(trifluoromethyl)quinoline-6-carbaldehyde (**3ja**).

The compound (75.0 mg, 82%) was prepared from the general procedure **A** (petroleum ether : ethyl acetate = 100:1→50:1, v/v) as a yellow solid.

M. p. 127-128 °C.



$^1\text{H}$  NMR (500 MHz,  $\text{CDCl}_3$ )  $\delta$  10.11 (s, 1H), 8.49 (d,  $J = 1.6$  Hz, 1H), 8.37 (d,  $J = 8.8$  Hz, 1H), 8.27 (dd,  $J = 8.8, 1.7$  Hz, 1H), 7.78 (s, 1H), 7.67-7.58 (m, 3H), 7.58-7.52 (m, 2H).

$^{13}\text{C}$  NMR (126 MHz,  $\text{CDCl}_3$ )  $\delta$  191.3, 152.8, 150.5, 150.0 (q,  $^2J_{\text{C-F}} = 35$  Hz), 136.3, 135.8, 131.9, 131.9, 129.8, 129.6, 129.3, 127.6, 127.2, 121.3 (q,  $^1J_{\text{C-F}} = 275$  Hz), 118.1 (q,  $^3J_{\text{C-F}} = 2$  Hz).

$^{19}\text{F}$  NMR (471 MHz,  $\text{CDCl}_3$ )  $\delta$  -67.8.

HRMS (ESI)  $m/z$  calcd for  $\text{C}_{17}\text{H}_{11}\text{F}_3\text{NO}^+$   $[\text{M}+\text{H}]^+$ : 302.0787, Found 302.0788.

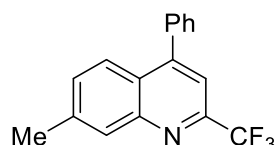

7-Methyl-4-phenyl-2-(trifluoromethyl)quinoline (**3ka**).

The compound (76.9 mg, 89%) was prepared from the general procedure **A** (petroleum ether : ethyl acetate = 100:1→50:1, v/v) as a yellow oil; the compound (79.5 mg, 92%) was prepared from the general procedure **B** (petroleum ether : ethyl acetate = 100:1→50:1, v/v) as a yellow oil.

$^1\text{H}$  NMR (500 MHz,  $\text{CDCl}_3$ )  $\delta$  8.07 (s, 1H), 7.87 (d,  $J = 8.6$  Hz, 1H), 7.62 (s, 1H), 7.57-7.52 (m, 3H), 7.52-7.49 (m, 2H), 7.43 (dd,  $J = 8.7, 1.7$  Hz, 1H), 2.58 (s, 3H).

$^{13}\text{C}$  NMR (126 MHz,  $\text{CDCl}_3$ )  $\delta$  150.7, 148.2, 147.6 (q,  $^2J_{\text{C-F}} = 35$  Hz), 141.2, 137.4, 131.0, 129.6, 129.5, 129.0, 128.9, 125.6, 125.6, 121.9 (q,  $^1J_{\text{C-F}} = 276$  Hz), 116.3 (q,  $^3J_{\text{C-F}} = 2$  Hz), 21.8.

$^{19}\text{F}$  NMR (471 MHz,  $\text{CDCl}_3$ )  $\delta$  -67.4.

HRMS (ESI)  $m/z$  calcd for  $\text{C}_{17}\text{H}_{13}\text{F}_3\text{N}^+$   $[\text{M}+\text{H}]^+$ : 288.0995, Found 288.0998.

The spectral data were in accordance with those reported in the literature.<sup>8</sup>

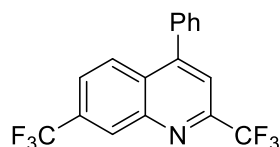

4-Phenyl-2,7-bis(trifluoromethyl)quinoline (**3la**).

The compound (85.7mg, 83%) was prepared from the general procedure **A** (petroleum ether : ethyl acetate = 100:1→50:1, v/v) as a yellow oil.

$^1\text{H}$  NMR (500 MHz,  $\text{CDCl}_3$ )  $\delta$  8.62 (s, 1H), 8.15 (d,  $J = 8.9$  Hz, 1H), 7.79 (dd,  $J = 8.5, 1.8$  Hz, 2H), 7.63-7.58 (m, 3H), 7.55-7.47 (m, 2H).

$^{13}\text{C}$  NMR (126 MHz,  $\text{CDCl}_3$ )  $\delta$  151.4, 149.1 (q,  $^2J_{\text{C-F}} = 35$  Hz), 147.0, 136.5, 132.6 (q,  $^2J_{\text{C-F}} = 33$  Hz), 129.6, 129.6, 129.2, 129.0, 128.5 (q,  $^3J_{\text{C-F}} = 5$  Hz), 127.6, 124.3 (q,  $^3J_{\text{C-F}} = 3$  Hz), 123.6 (q,  $^1J_{\text{C-F}} = 273$  Hz), 121.6 (q,  $^1J_{\text{C-F}} = 275$  Hz), 118.9 (q,  $^3J_{\text{C-F}} = 2$  Hz).

$^{19}\text{F}$  NMR (471 MHz,  $\text{CDCl}_3$ )  $\delta$  -63.1, -67.8.

HRMS (ESI)  $m/z$  calcd for  $\text{C}_{17}\text{H}_{10}\text{F}_6\text{N}^+$   $[\text{M}+\text{H}]^+$ : 342.0712, Found 342.0715.

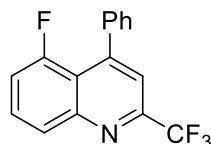

5-Fluoro-4-phenyl-2-(trifluoromethyl)quinoline (**3ma**).

The compound **3ma** (55.2 mg, 63%) and **3m'a** (16.7 mg, 19%) was prepared from the general procedure **A** (petroleum ether : ethyl acetate = 100:1→50:1, v/v) as a yellow solid and a white solid, respectively.

M. p. 87-88 °C.

$^1\text{H}$  NMR (500 MHz,  $\text{CDCl}_3$ )  $\delta$  8.14 (d,  $J = 8.6$  Hz, 1H), 7.78 (ddd,  $J = 8.0, 8.0, 5.2$  Hz, 1H), 7.63 (s, 1H), 7.52-7.47 (m, 3H), 7.46-7.41 (m, 2H), 7.29 (ddd,  $J = 11.7, 7.8, 0.9$  Hz, 1H).

$^{13}\text{C}$  NMR (126 MHz,  $\text{CDCl}_3$ )  $\delta$  158.1 (d,  $^1J_{\text{C-F}} = 258$  Hz), 149.0 (q,  $^3J_{\text{C-F}} = 2$  Hz), 148.0 (q,  $^2J_{\text{C-F}} = 35$  Hz), 139.4 (d,  $^4J_{\text{C-F}} = 4$  Hz), 130.4 (d,  $^3J_{\text{C-F}} = 10$  Hz), 128.6, 128.4 (d,  $^4J_{\text{C-F}} = 4$  Hz), 128.0, 126.9 (d,  $^4J_{\text{C-F}} = 4.0$  Hz), 121.5 (q,  $^1J_{\text{C-F}} = 275$  Hz), 119.2, 118.2 (d,  $^3J_{\text{C-F}} = 10$  Hz), 118.1 (d,  $^2J_{\text{C-F}} = 24$  Hz), 113.7 (d,  $^2J_{\text{C-F}} = 22$  Hz).

$^{19}\text{F}$  NMR (471 MHz,  $\text{CDCl}_3$ )  $\delta$  -67.7, -104.9.

HRMS (ESI)  $m/z$  calcd for  $\text{C}_{16}\text{H}_{10}\text{F}_4\text{N}^+$   $[\text{M}+\text{H}]^+$ : 292.0744, Found 292.0747.

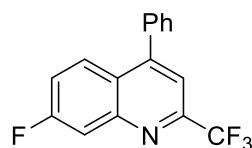

7-Fluoro-4-phenyl-2-(trifluoromethyl)quinoline (**3m'a**).

M. p. 100-102 °C.

$^1\text{H}$  NMR (500 MHz,  $\text{CDCl}_3$ )  $\delta$  8.00 (dd,  $J = 9.3, 6.0$  Hz, 1H), 7.91 (dd,  $J = 9.7, 2.6$  Hz, 1H), 7.65 (s, 1H), 7.60-7.54 (m, 3H), 7.53-7.48 (m, 2H), 7.41 (ddd,  $J = 9.4, 8.0, 2.6$  Hz, 1H).

$^{13}\text{C}$  NMR (126 MHz,  $\text{CDCl}_3$ )  $\delta$  163.6 (d,  $^1J_{\text{C-F}} = 252$  Hz), 153.3, 149.2 (d,  $^3J_{\text{C-F}} = 12$  Hz), 148.8 (q,  $^2J_{\text{C-F}} = 35$  Hz), 137.0, 129.6, 129.4, 129.1, 128.5 (d,  $^3J_{\text{C-F}} = 10$  Hz), 124.7, 121.6 (q,  $^1J_{\text{C-F}} = 274$  Hz), 119.3 (d,  $^2J_{\text{C-F}} = 25$  Hz), 116.6 (q,  $^3J_{\text{C-F}} = 2$  Hz), 114.1 (d,  $^2J_{\text{C-F}} = 21$  Hz).

$^{19}\text{F}$  NMR (471 MHz,  $\text{CDCl}_3$ )  $\delta$  -67.7, -107.7.

HRMS (ESI)  $m/z$  calcd for  $\text{C}_{16}\text{H}_{10}\text{F}_4\text{N}^+$   $[\text{M}+\text{H}]^+$ : 292.0744, Found 292.0748.

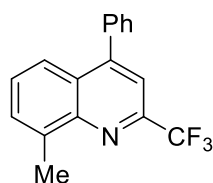

8-Methyl-4-phenyl-2-(trifluoromethyl)quinoline (**3na**).

The compound (72.4 mg, 84%) was prepared from the general procedure **A** (petroleum ether : ethyl acetate = 100:1→50:1, v/v) as a pale yellow oil. The compound (68.8 mg, 79%) was prepared from the general procedure **B** (petroleum ether : ethyl acetate = 100:1→50:1, v/v) as a pale yellow oil.

$^1\text{H}$  NMR (500 MHz,  $\text{CDCl}_3$ )  $\delta$  7.85 (d,  $J = 8.5$  Hz, 1H), 7.73 (s, 1H), 7.67 (d,  $J = 6.9$  Hz, 1H), 7.61-7.48 (m, 6H), 2.94 (s, 3H).

$^{13}\text{C}$  NMR (126 MHz,  $\text{CDCl}_3$ )  $\delta$  150.9, 147.0, 146.3 (q,  $^2J_{\text{C-F}} = 35$  Hz), 138.9, 137.8, 130.6, 129.7, 128.9, 128.8, 128.3, 127.6, 123.9, 122.1 (q,  $^1J_{\text{C-F}} = 275$  Hz), 116.9 (q,  $^3J_{\text{C-F}} = 2$  Hz), 18.3.

$^{19}\text{F}$  NMR (471 MHz,  $\text{CDCl}_3$ )  $\delta$  -67.3.

HRMS (ESI)  $m/z$  calcd for  $\text{C}_{17}\text{H}_{13}\text{F}_3\text{N}^+$   $[\text{M}+\text{H}]^+$ : 288.0995, Found 288.0999.

The spectral data were in accordance with those reported in the literature.<sup>6</sup>

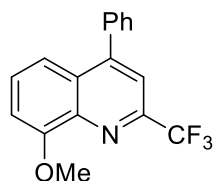

8-Methoxy-4-phenyl-2-(trifluoromethyl)quinoline (**3oa**).

The compound (73.3 mg, 80%) was prepared from the general procedure **A** (petroleum ether : ethyl acetate = 100:1→30:1, v/v) as a white solid; the compound (74.6 mg, 81%) was prepared from the general procedure **B** (petroleum ether : ethyl acetate = 100:1→30:1, v/v) as a white solid. M. p. 70-72 °C.

$^1\text{H}$  NMR (500 MHz,  $\text{CDCl}_3$ )  $\delta$  7.70 (s, 1H), 7.57-7.47 (m, 7H), 7.16 (dd,  $J = 4.9, 3.9$  Hz, 1H), 4.12 (s, 3H).

$^{13}\text{C}$  NMR (126 MHz,  $\text{CDCl}_3$ )  $\delta$  156.2, 150.8, 146.3 (q,  $^2J_{\text{C-F}} = 35$  Hz), 139.9, 137.6, 129.6, 129.0, 128.9, 128.8, 121.8 (q,  $^1J_{\text{C-F}} = 276$  Hz), 117.9, 117.6, 108.8, 56.5. (One carbon is invisible)

$^{19}\text{F}$  NMR (471 MHz,  $\text{CDCl}_3$ )  $\delta$  -66.9.

HRMS (ESI)  $m/z$  calcd for  $\text{C}_{17}\text{H}_{13}\text{F}_3\text{NO}^+$   $[\text{M}+\text{H}]^+$ : 304.0944, Found 304.0946.

The spectral data were in accordance with those reported in the literature.<sup>5</sup>

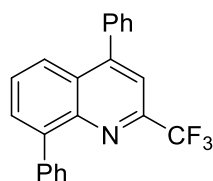

4,8-Diphenyl-2-(trifluoromethyl)quinoline (**3pa**).

The compound (96.2 mg, 91%) was prepared from the general procedure **A** (petroleum ether : ethyl acetate = 100:1→50:1, v/v) as a yellow solid.

M. p. 112-113 °C.

$^1\text{H}$  NMR (500 MHz,  $\text{CDCl}_3$ )  $\delta$  8.02 (dd,  $J = 8.5, 1.4$  Hz, 1H), 7.92 (dd,  $J = 7.1, 1.4$  Hz, 1H), 7.88 (dd,  $J = 8.2, 1.3$  Hz, 2H), 7.76 (s, 1H), 7.70 (dd,  $J = 8.5, 7.2$  Hz, 1H), 7.63-7.55 (m, 7H), 7.52-7.47 (m, 1H).

$^{13}\text{C}$  NMR (126 MHz,  $\text{CDCl}_3$ )  $\delta$  151.1, 147.0 (q,  $^2J_{\text{C-F}} = 35$  Hz), 145.4, 141.8, 138.8, 137.7, 131.4, 131.2, 129.6, 129.0, 128.9, 128.4, 128.0, 127.9, 127.7, 125.5, 121.9 (q,  $^1J_{\text{C-F}} = 275$  Hz), 117.1 (q,  $^3J_{\text{C-F}} = 2$  Hz).

$^{19}\text{F}$  NMR (471 MHz,  $\text{CDCl}_3$ )  $\delta$  -67.3.

HRMS (ESI)  $m/z$  calcd for  $\text{C}_{22}\text{H}_{15}\text{F}_3\text{N}^+$   $[\text{M}+\text{H}]^+$ : 350.1151, Found 350.1153.

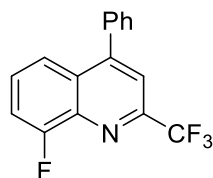

8-Fluoro-4-phenyl-2-(trifluoromethyl)quinoline (**3qa**).

The compound (74.5 mg, 85%) was prepared from the general procedure **3** (petroleum ether : ethyl acetate = 100:1→50:1, v/v) as a yellow oil; The compound (70.0 mg, 80%) was prepared from the general procedure **B** (petroleum ether : ethyl acetate = 100:1→50:1, v/v) as a yellow oil.

$^1\text{H}$  NMR (500 MHz,  $\text{CDCl}_3$ )  $\delta$  7.78 (d,  $J = 8.6$  Hz, 1H), 7.73 (s, 1H), 7.59-7.46 (m, 7H).

$^{13}\text{C}$  NMR (126 MHz,  $\text{CDCl}_3$ )  $\delta$  158.3 (d,  $^1J_{\text{C-F}} = 255$  Hz), 151.1 (d,  $^4J_{\text{C-F}} = 3$  Hz), 147.7 (q,  $^2J_{\text{C-F}} = 36$  Hz), 138.4 (d,  $^3J_{\text{C-F}} = 12$  Hz), 136.8, 129.5, 129.4, 129.1, 129.0 (d,  $^2J_{\text{C-F}} = 17$  Hz), 128.5 (d,  $^3J_{\text{C-F}} = 8$  Hz), 121.8 (d,  $^4J_{\text{C-F}} = 5$  Hz), 121.5 (q,  $^1J_{\text{C-F}} = 274$  Hz), 118.1 (q,  $^3J_{\text{C-F}} = 2$  Hz), 114.6 (d,  $^2J_{\text{C-F}} = 19$  Hz).

$^{19}\text{F}$  NMR (471 MHz,  $\text{CDCl}_3$ )  $\delta$  -67.4, -122.0.

HRMS (ESI)  $m/z$  calcd for  $\text{C}_{16}\text{H}_{10}\text{F}_4\text{N}^+$   $[\text{M}+\text{H}]^+$ : 292.0744, Found 292.0749.

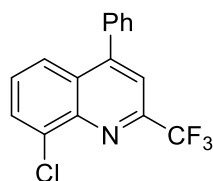

8-Chloro-4-phenyl-2-(trifluoromethyl)quinoline (**3ra**).

The compound (83.5 mg, 90%) was prepared from the general procedure **A** (petroleum ether : ethyl acetate = 100:1→50:1, v/v) as a red oil.

$^1\text{H}$  NMR (500 MHz,  $\text{CDCl}_3$ )  $\delta$  7.90 (dd,  $J = 7.9, 1.2$  Hz, 2H), 7.74 (d,  $J = 1.7$  Hz, 1H), 7.63-7.46 (m, 6H).

$^{13}\text{C}$  NMR (126 MHz,  $\text{CDCl}_3$ )  $\delta$  151.7, 147.8 (q,  $^2J_{\text{C-F}} = 35$  Hz), 144.2, 136.8, 134.9, 130.7, 129.5, 129.3, 128.9, 128.9, 128.3, 125.0, 121.5 (q,  $^1J_{\text{C-F}} = 275$  Hz), 118.0 (q,  $^3J_{\text{C-F}} = 2$  Hz).

$^{19}\text{F}$  NMR (471 MHz,  $\text{CDCl}_3$ )  $\delta$  -67.3.

HRMS (ESI)  $m/z$  calcd for  $\text{C}_{16}\text{H}_{10}\text{ClF}_3\text{N}^+$   $[\text{M}+\text{H}]^+$ : 308.0488, Found 308.0450.

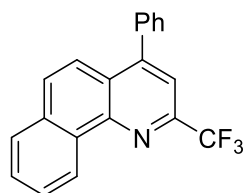

4-Phenyl-2-(trifluoromethyl)benzo[*h*]quinoline (**3sa**).

The compound (67.5 mg, 69%) was prepared from the general procedure **A** (petroleum ether : ethyl acetate = 100:1→50:1, v/v) as a white solid.

M. p. 87-89 °C.

$^1\text{H}$  NMR (500 MHz,  $\text{CDCl}_3$ )  $\delta$  9.44 (dd,  $J = 8.0, 1.4$  Hz, 1H), 7.91 (dd,  $J = 7.8, 1.4$  Hz, 1H), 7.8-7.74 (m, 5H), 7.61-7.53 (m, 5H).

$^{13}\text{C}$  NMR (126 MHz,  $\text{CDCl}_3$ )  $\delta$  150.2, 146.6, 145.9 (q,  $^2J_{\text{C-F}} = 35$  Hz), 137.6, 133.5, 131.4, 129.8, 129.6, 129.1, 128.9, 128.8, 127.7, 127.7, 125.7, 125.4, 122.4, 121.9 (q,  $^1J_{\text{C-F}} = 274$  Hz), 118.2 (q,  $^3J_{\text{C-F}} = 2$  Hz).

$^{19}\text{F}$  NMR (471 MHz,  $\text{CDCl}_3$ )  $\delta$  -67.0.

HRMS (ESI)  $m/z$  calcd for  $\text{C}_{20}\text{H}_{13}\text{F}_3\text{N}^+$   $[\text{M}+\text{H}]^+$ : 324.0955, Found 324.0998.

The spectral data were in accordance with those reported in the literature.<sup>5</sup>

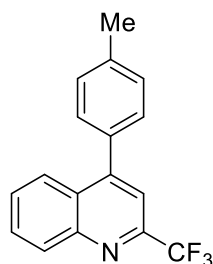

4-(*p*-Tolyl)-2-(trifluoromethyl)quinoline (**3ab**).

The compound (84.5 mg, 98%) was prepared from the general procedure **A** (petroleum ether : ethyl acetate = 100:1→50:1, v/v) as a yellow oil.

$^1\text{H}$  NMR (500 MHz,  $\text{CDCl}_3$ )  $\delta$  8.29 (d,  $J = 8.5$  Hz, 1H), 8.02 (d,  $J = 8.5$  Hz, 1H), 7.83-7.79 (ddd,  $J = 8.8, 6.7, 1.4$  Hz, 1H), 7.68 (s, 1H), 7.63-7.58 (ddd,  $J = 8.5, 6.8, 1.2$  Hz, 1H), 7.42 (d,  $J = 8.1$  Hz, 2H), 7.37 (d,  $J = 7.9$  Hz, 2H), 2.48 (s, 3H).

$^{13}\text{C}$  NMR (126 MHz,  $\text{CDCl}_3$ )  $\delta$  151.1, 147.9, 147.6 (q,  $^2J_{\text{C-F}} = 35$  Hz), 139.2, 134.3, 130.6, 130.6, 129.6, 129.5, 128.6, 127.6, 126.1, 121.8 (q,  $^1J_{\text{C-F}} = 276$  Hz), 117.0 (q,  $^3J_{\text{C-F}} = 2$  Hz), 21.4.

$^{19}\text{F}$  NMR (471 MHz,  $\text{CDCl}_3$ )  $\delta$  -67.4.

HRMS (ESI)  $m/z$  calcd for  $\text{C}_{17}\text{H}_{13}\text{F}_3\text{N}^+$   $[\text{M}+\text{H}]^+$ : 288.0995, Found 288.0999.

The spectral data were in accordance with those reported in the literature.<sup>8</sup>

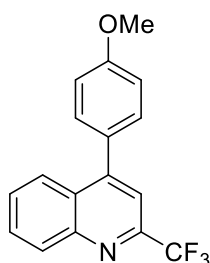

4-(4-Methoxyphenyl)-2-(trifluoromethyl)quinoline (**3ac**).

The compound (79.9 mg, 87%) was prepared from the general procedure **A** (petroleum ether : ethyl acetate = 100:1→50:1, v/v) as a yellow oil; the compound (78.4 mg, 86%) was prepared from the general procedure **B** (petroleum ether : ethyl acetate = 100:1→50:1, v/v) as a yellow oil.

$^1\text{H}$  NMR (500 MHz,  $\text{CDCl}_3$ )  $\delta$  8.27 (d,  $J = 8.4$  Hz, 1H), 8.04 (d,  $J = 8.0$  Hz, 1H), 7.81 (ddd,  $J = 8.3, 6.7, 1.4$  Hz, 1H), 7.66 (s, 1H), 7.61 (ddd,  $J = 7.8, 7.8, 1.1$  Hz, 1H), 7.47 (ddd,  $J = 8.2, 6.9, 1.3$  Hz, 2H), 7.13-7.06 (m, 2H), 3.91 (s, 3H).

$^{13}\text{C}$  NMR (126 MHz,  $\text{CDCl}_3$ )  $\delta$  160.5, 150.8, 148.0, 147.7 (q,  $^2J_{\text{C-F}} = 35$  Hz), 131.0, 130.6, 130.6, 129.5, 128.6, 127.7, 126.1, 121.8 (q,  $^1J_{\text{C-F}} = 273$  Hz), 117.0 (q,  $^3J_{\text{C-F}} = 2$  Hz), 114.4, 55.6.

$^{19}\text{F}$  NMR (471 MHz,  $\text{CDCl}_3$ )  $\delta$  -67.5.

HRMS (ESI)  $m/z$  calcd for  $\text{C}_{17}\text{H}_{13}\text{F}_3\text{NO}^+$   $[\text{M}+\text{H}]^+$ : 304.0944, Found 304.0947.

The spectral data were in accordance with those reported in the literature.<sup>5</sup>

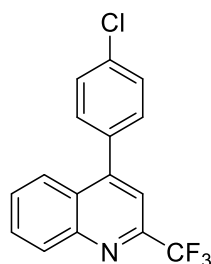

4-(4-Chlorophenyl)-2-(trifluoromethyl)quinoline (**3ad**).

The compound (81.5 mg, 88%) was prepared from the general procedure **A** (petroleum ether : ethyl acetate = 100:1→50:1, v/v) as a white solid.

M. p. 93-94 °C.

$^1\text{H}$  NMR (500 MHz,  $\text{CDCl}_3$ )  $\delta$  8.28 (d,  $J = 8.4$  Hz, 1H), 7.93 (d,  $J = 8.5$  Hz, 1H), 7.82 (ddd,  $J = 8.3, 6.0, 1.4$  Hz, 1H), 7.67-7.60 (m, 2H), 7.56-7.51 (m, 2H), 7.50-7.44 (m, 2H).

$^{13}\text{C}$  NMR (126 MHz,  $\text{CDCl}_3$ )  $\delta$  149.6, 147.8, 147.6 (q,  $^2J_{\text{C-F}} = 34$  Hz), 135.5, 135.4, 130.8, 130.7, 130.6, 129.1, 128.9, 127.2, 125.5, 121.6 (q,  $^1J_{\text{C-F}} = 275$  Hz), 116.9 (q,  $^3J_{\text{C-F}} = 2$  Hz).

$^{19}\text{F}$  NMR (471 MHz,  $\text{CDCl}_3$ )  $\delta$  -67.4.

HRMS (ESI)  $m/z$  calcd for  $\text{C}_{16}\text{H}_{10}\text{ClF}_3\text{N}^+$   $[\text{M}+\text{H}]^+$ : 308.0448, Found 308.0452.

The spectral data were in accordance with those reported in the literature.<sup>5</sup>

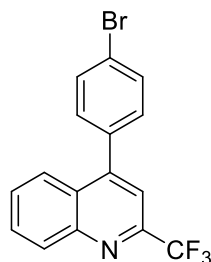

4-(4-Bromophenyl)-2-(trifluoromethyl)quinoline (**3ae**).

The compound (85.5 mg, 80%) was prepared from the general procedure **A** (petroleum ether : ethyl acetate = 100:1→50:1, v/v) as a pale yellow solid.

M. p. 94-97 °C.

<sup>1</sup>H NMR (500 MHz, CDCl<sub>3</sub>) δ 8.29 (d, *J* = 8.5 Hz, 1H), 8.02-7.90 (dd, *J* = 31.6, 8.2 Hz, 1H), 7.84 (dd, *J* = 7.6, 5.3 Hz, 1H), 7.77-7.59 (m, 4H), 7.40 (d, *J* = 8.2 Hz, 2H).

<sup>13</sup>C NMR (126 MHz, CDCl<sub>3</sub>) δ 149.6, 147.8, 147.6 (q, <sup>1</sup>*J*<sub>C-F</sub> = 35 Hz), 136.0, 132.1, 131.1, 130.7, 130.6, 128.9, 127.1, 125.5, 123.6, 121.6 (q, <sup>1</sup>*J*<sub>C-F</sub> = 275 Hz), 116.9 (q, <sup>3</sup>*J*<sub>C-F</sub> = 2 Hz).

<sup>19</sup>F NMR (471 MHz, CDCl<sub>3</sub>) δ -67.5.

HRMS (ESI) *m/z* calcd for C<sub>16</sub>H<sub>10</sub>BrF<sub>3</sub>N<sup>+</sup> [M+H]<sup>+</sup>: 351.9943, Found 351.9948.

The spectral data were in accordance with those reported in the literature.<sup>8</sup>

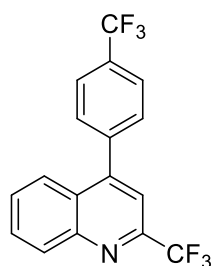

2-(Trifluoromethyl)-4-(4-(trifluoromethyl)phenyl)quinoline (**3af**).

The compound (85.0 mg, 83%) was prepared from the general procedure **A** (petroleum ether : ethyl acetate = 100:1→50:1, v/v) as a white solid.

M. p. 119-121 °C.

<sup>1</sup>H NMR (500 MHz, CDCl<sub>3</sub>) δ 8.30 (d, *J* = 8.5 Hz, 1H), 7.90 (d, *J* = 8.5 Hz, 1H), 7.88-7.81 (m, 3H), 7.73-7.63 (m, 4H).

<sup>13</sup>C NMR (126 MHz, CDCl<sub>3</sub>) δ 149.4, 147.9, 147.7 (q, <sup>2</sup>*J*<sub>C-F</sub> = 35 Hz), 140.9, 131.4 (q, <sup>2</sup>*J*<sub>C-F</sub> = 35 Hz), 131.0, 130.8, 130.1, 129.2, 127.1, 126.0 (q, <sup>3</sup>*J*<sub>C-F</sub> = 2 Hz), 125.5, 124.0 (q, <sup>1</sup>*J*<sub>C-F</sub> = 275 Hz), 121.6 (q, <sup>1</sup>*J*<sub>C-F</sub> = 276 Hz), 117.1 (q, <sup>3</sup>*J*<sub>C-F</sub> = 2 Hz).



$^{19}\text{F}$  NMR (471 MHz,  $\text{CDCl}_3$ )  $\delta$  -67.2, -67.5.

HRMS (ESI)  $m/z$  calcd for  $\text{C}_{17}\text{H}_{10}\text{F}_6\text{N}^+$   $[\text{M}+\text{H}]^+$ : 342.0712, Found 342.0716.

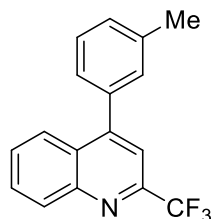

4-(*m*-Tolyl)-2-(trifluoromethyl)quinoline (**3ag**).

The compound (83.9 mg, 97%) was prepared from the general procedure **A** (petroleum ether : ethyl acetate = 100:1→50:1, v/v) as a yellow oil; The compound (74.3 mg, 86%) was prepared from the general procedure **B** (petroleum ether : ethyl acetate = 100:1→50:1, v/v) as a yellow oil.

$^1\text{H}$  NMR (500 MHz,  $\text{CDCl}_3$ )  $\delta$  8.30 (d,  $J$  = 8.4 Hz, 1H), 8.04 (dd,  $J$  = 8.5, 1.0 Hz, 1H), 7.82 (ddd,  $J$  = 8.4, 6.8, 1.3 Hz, 1H), 7.69 (s, 1H), 7.61 (ddd,  $J$  = 8.2, 6.9, 1.1 Hz, 1H), 7.44 (dd,  $J$  = 7.7, 7.7 Hz, 1H), 7.37-7.29 (m, 3H), 2.48 (s, 3H).

$^{13}\text{C}$  NMR (126 MHz,  $\text{CDCl}_3$ )  $\delta$  151.3, 147.9, 147.6 (q,  $^2J_{\text{C-F}}$  = 36 Hz), 138.8, 137.2, 130.6, 130.6, 130.2, 129.9, 128.8, 128.6, 127.6, 126.7, 126.1, 121.8 (q,  $^1J_{\text{C-F}}$  = 275 Hz), 117.1 (q,  $^3J_{\text{C-F}}$  = 2 Hz), 21.4.

$^{19}\text{F}$  NMR (471 MHz,  $\text{CDCl}_3$ )  $\delta$  -67.4.

HRMS (ESI)  $m/z$  calcd for  $\text{C}_{17}\text{H}_{13}\text{F}_3\text{N}^+$   $[\text{M}+\text{H}]^+$ : 288.0995, Found 288.0999.

The spectral data were in accordance with those reported in the literature.<sup>8</sup>

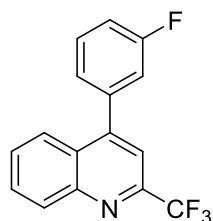

4-(3-Fluorophenyl)-2-(trifluoromethyl)quinoline (**3ah**).

The compound (82.3 mg, 94%) was prepared from the general procedure **A** (petroleum ether : ethyl acetate = 100:1→50:1, v/v) as a white solid.

M. p. 92-93 °C.

$^1\text{H}$  NMR (500 MHz,  $\text{CDCl}_3$ )  $\delta$  8.30 (d,  $J$  = 8.6 Hz, 1H), 7.97 (d,  $J$  = 8.5 Hz, 1H), 7.84 (ddd,  $J$  = 7.5, 7.5, 1.0 Hz, 1H), 7.69 (s, 1H), 7.66 (dd,  $J$  = 7.7, 7.7 Hz, 1H), 7.57-7.51 (m, 2H), 7.32-7.26 (m, 2H).

$^{13}\text{C}$  NMR (126 MHz,  $\text{CDCl}_3$ )  $\delta$  163.3 (d,  $^1J_{\text{C-F}} = 249$  Hz), 149.9, 147.9, 147.6 (q,  $^2J_{\text{C-F}} = 35$  Hz), 133.2 (d,  $^4J_{\text{C-F}} = 2$  Hz), 131.4, 131.4, 130.7 (d,  $^3J_{\text{C-F}} = 10$  Hz), 130.7 (d,  $^3J_{\text{C-F}} = 10$  Hz), 128.9, 127.4, 125.7, 121.7 (q,  $^1J_{\text{C-F}} = 275$  Hz), 117.1 (q,  $^3J_{\text{C-F}} = 2$  Hz), 116.1 (d,  $^2J_{\text{C-F}} = 22$  Hz), 116.1 (d,  $^2J_{\text{C-F}} = 22$  Hz).

$^{19}\text{F}$  NMR (471 MHz,  $\text{CDCl}_3$ )  $\delta$  -67.4, -112.1.

HRMS (ESI)  $m/z$  calcd for  $\text{C}_{16}\text{H}_{10}\text{F}_4\text{N}^+$   $[\text{M}+\text{H}]^+$ : 292.0744, Found 292.0746.

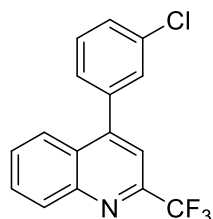

4-(3-Chlorophenyl)-2-(trifluoromethyl)quinoline (**3ai**).

The compound (91.5 mg, 99%) was prepared from the general procedure **A** (petroleum ether : ethyl acetate = 100:1→50:1, v/v) as a yellow oil; The compound (65.5 mg, 70%) was prepared from the general procedure **B** (petroleum ether : ethyl acetate = 100:1→50:1, v/v) as a yellow oil.

$^1\text{H}$  NMR (500 MHz,  $\text{CDCl}_3$ )  $\delta$  8.29 (d,  $J = 8.5$  Hz, 1H), 7.92 (d,  $J = 8.5$  Hz, 1H), 7.83 (ddd,  $J = 8.4, 6.8, 1.4$  Hz, 1H), 7.68-7.61 (m, 2H), 7.54-7.47 (m, 3H), 7.40 (m, 1H).

$^{13}\text{C}$  NMR (126 MHz,  $\text{CDCl}_3$ )  $\delta$  149.4, 147.9, 147.6 (q,  $^2J_{\text{C-F}} = 35$  Hz), 138.9, 135.0, 130.9, 130.7, 130.2, 129.6, 129.3, 129.1, 127.8, 127.2, 125.6, 121.6 (q,  $^1J_{\text{C-F}} = 275$  Hz), 117.1 (q,  $^3J_{\text{C-F}} = 2$  Hz).

$^{19}\text{F}$  NMR (471 MHz,  $\text{CDCl}_3$ )  $\delta$  -67.4.

HRMS (ESI)  $m/z$  calcd for  $\text{C}_{16}\text{H}_{10}\text{ClF}_3\text{N}^+$   $[\text{M}+\text{H}]^+$ : 308.0448, Found 308.0449.

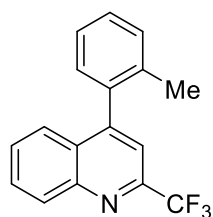

4-(*o*-Tolyl)-2-(trifluoromethyl)quinoline (**3aj**).

The compound (60.5 mg, 70%) was prepared from the general procedure **A** (petroleum ether : ethyl acetate = 100:1→50:1, v/v) as a yellow oil.

$^1\text{H}$  NMR (500 MHz,  $\text{CDCl}_3$ )  $\delta$  8.35 (d,  $J = 8.5$  Hz, 1H), 7.89-7.83 (m, 1H), 7.68 (s, 1H), 7.64-7.59 (m, 2H), 7.27 (dd,  $J = 7.5, 1.2$  Hz, 1H), 2.09 (s, 3H).

$^{13}\text{C}$  NMR (126 MHz,  $\text{CDCl}_3$ )  $\delta$  151.2, 147.7 (q,  $^2J_{\text{C-F}} = 35$  Hz), 147.6, 136.7, 136.0, 130.8, 130.6, 130.5, 129.6, 129.1, 128.7, 128.1, 126.1, 126.1, 121.8 (q,  $^1J_{\text{C-F}} = 275$  Hz), 117.3 (q,  $^3J_{\text{C-F}} = 2$  Hz), 20.0.

$^{19}\text{F}$  NMR (471 MHz,  $\text{CDCl}_3$ )  $\delta$  -67.4.

HRMS (ESI)  $m/z$  calcd for  $\text{C}_{17}\text{H}_{13}\text{F}_3\text{N}^+$   $[\text{M}+\text{H}]^+$ : 288.0995, Found 288.0997.

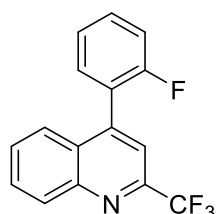

4-(2-Fluorophenyl)-2-(trifluoromethyl)quinoline (**3ak**).

The compound (76.2 mg, 87%) was prepared from the general procedure **A** (petroleum ether : ethyl acetate = 100:1→50:1, v/v) as a pale yellow oil; The compound (74.3 mg, 85%) was prepared from the general procedure **B** (petroleum ether : ethyl acetate = 100:1→50:1, v/v) as a pale yellow oil.

$^1\text{H}$  NMR (500 MHz,  $\text{CDCl}_3$ )  $\delta$  8.31 (d,  $J = 8.5$  Hz, 1H), 7.83 (ddd,  $J = 8.8, 7.8, 1.5$  Hz, 1H), 7.78 (d,  $J = 8.6$  Hz, 1H), 7.73 (s, 1H), 7.63 (ddd,  $J = 7.4, 7.4, 0.9$  Hz, 1H), 7.57-7.50 (m, 1H), 7.42 (ddd,  $J = 7.5, 7.5, 1.8$  Hz, 1H), 7.34 (ddd,  $J = 7.5, 7.5, 1.0$  Hz, 1H), 7.28 (ddd,  $J = 8.7, 8.7, 0.9$  Hz, 1H).

$^{13}\text{C}$  NMR (126 MHz,  $\text{CDCl}_3$ )  $\delta$  159.6 (d,  $^1J_{\text{C-F}} = 249$  Hz), 147.6, 147.6 (q,  $^2J_{\text{C-F}} = 35$  Hz), 145.2, 131.6 (d,  $^3J_{\text{C-F}} = 3$  Hz), 131.3 (d,  $^3J_{\text{C-F}} = 8$  Hz), 130.8, 130.6, 128.9, 127.7, 125.9 (d,  $^4J_{\text{C-F}} = 2$  Hz), 124.7 (d,  $^3J_{\text{C-F}} = 4$  Hz), 124.7 (d,  $^2J_{\text{C-F}} = 16$  Hz), 121.6 (q,  $^1J_{\text{C-F}} = 276$  Hz), 118.0 (q,  $^3J_{\text{C-F}} = 2$  Hz), 116.3 (d,  $^2J_{\text{C-F}} = 22$  Hz).

$^{19}\text{F}$  NMR (471 MHz,  $\text{CDCl}_3$ )  $\delta$  -67.4, -113.5.

HRMS (ESI)  $m/z$  calcd for  $\text{C}_{16}\text{H}_{10}\text{F}_4\text{N}^+$   $[\text{M}+\text{H}]^+$ : 292.0744, Found 292.0747.

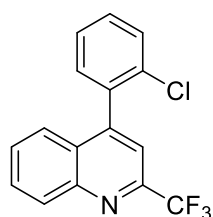

4-(2-Chlorophenyl)-2-(trifluoromethyl)quinoline (**3al**).

The compound (83.4 mg, 90%) was prepared from the general procedure **A** (petroleum ether : ethyl acetate = 100:1→50:1, v/v) as a yellow oil.

$^1\text{H}$  NMR (500 MHz,  $\text{CDCl}_3$ )  $\delta$  8.31 (d,  $J = 8.5$  Hz, 1H), 7.86-7.80 (m, 1H), 7.67 (s, 1H), 7.64-7.56 (m, 3H), 7.49 (ddd,  $J = 7.6, 7.6, 1.8$  Hz, 1H), 7.44 (ddd,  $J = 7.6, 7.6, 1.8$  Hz, 1H), 7.36 (dd,  $J = 7.5, 1.8$  Hz, 1H).

$^{13}\text{C}$  NMR (126 MHz,  $\text{CDCl}_3$ )  $\delta$  148.4, 147.6, 147.6 (q,  $^2J_{\text{C-F}} = 36$  Hz), 135.9, 133.3, 131.3, 130.9, 130.6, 130.5, 130.2, 128.9, 127.7, 127.1, 126.0, 121.8 (q,  $^1J_{\text{C-F}} = 275$  Hz), 117.7 (q,  $^3J_{\text{C-F}} = 2$  Hz).

$^{19}\text{F}$  NMR (471 MHz,  $\text{CDCl}_3$ )  $\delta$  -67.4.

HRMS (ESI)  $m/z$  calcd for  $\text{C}_{16}\text{H}_{10}\text{ClF}_3\text{N}^+$   $[\text{M}+\text{H}]^+$ : 308.0448, Found 308.0453.

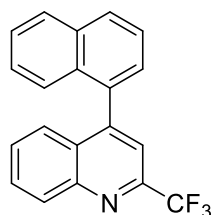

4-(1-Naphthalenyl)-2-(trifluoromethyl)quinoline (**3am**).

The compound (92.4 mg, 95%) was prepared from the general procedure **A** (petroleum ether : ethyl acetate = 100:1→50:1, v/v) as a pale yellow solid; the compound (93.8 mg, 96%) was prepared from the general procedure **B** (petroleum ether : ethyl acetate = 100:1→50:1, v/v) as a pale yellow solid.

M. p. 96-98 °C.

$^1\text{H}$  NMR (500 MHz,  $\text{CDCl}_3$ )  $\delta$  8.35 (d,  $J = 8.5$  Hz, 1H), 8.07-8.00 (m, 3H), 7.98-7.91 (m, 2H), 7.84 (ddd,  $J = 8.4, 6.8, 1.4$  Hz, 1H), 7.79 (s, 1H), 7.65-7.58 (m, 4H).

$^{13}\text{C}$  NMR (126 MHz,  $\text{CDCl}_3$ )  $\delta$  151.0, 147.9, 147.7 (q,  $^2J_{\text{C-F}} = 35$  Hz), 134.6, 133.3, 133.3, 130.7, 130.6, 129.1, 128.8, 128.6, 128.4, 128.0, 127.7, 127.2, 127.0, 127.0, 126.1, 121.8 (q,  $^1J_{\text{C-F}} = 276$  Hz), 117.3 (q,  $^3J_{\text{C-F}} = 2$  Hz).

$^{19}\text{F}$  NMR (471 MHz,  $\text{CDCl}_3$ )  $\delta$  -67.3.

HRMS (ESI)  $m/z$  calcd for  $\text{C}_{20}\text{H}_{13}\text{F}_3\text{N}^+$   $[\text{M}+\text{H}]^+$ : 324.0995, Found 324.0998.

The spectral data were in accordance with those reported in the literature.<sup>5</sup>

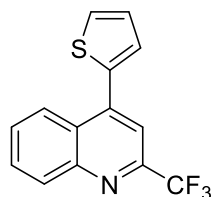

4-(Thiophen-2-yl)-2-(trifluoromethyl)quinoline (**3an**).

The compound (42.0 mg, 50%) was prepared from the general procedure **A** for 6 h (petroleum ether : ethyl acetate = 100:1→50:1, v/v) as a yellow oil.

$^1\text{H}$  NMR (500 MHz,  $\text{CDCl}_3$ )  $\delta$  8.37 (d,  $J = 8.5$  Hz, 1H), 8.29 (d,  $J = 8.5$  Hz, 1H), 7.85 (ddd,  $J = 8.4, 6.8, 1.4$  Hz, 1H), 7.78 (s, 1H), 7.69 (ddd,  $J = 8.3, 6.7, 1.3$  Hz, 1H), 7.59 (d,  $J = 5.1$  Hz, 1H), 7.45 (dd,  $J = 3.6, 1.1$  Hz, 1H), 7.29-7.26 (m, 1H).

$^{13}\text{C}$  NMR (126 MHz,  $\text{CDCl}_3$ )  $\delta$  148.1, 147.6 (q,  $^2J_{\text{C-F}} = 35$  Hz), 143.4, 137.9, 130.8, 130.7, 129.5, 129.1, 128.3, 128.2, 127.1, 125.7, 121.6 (q,  $^1J_{\text{C-F}} = 276$  Hz), 117.3 (q,  $^3J_{\text{C-F}} = 2$  Hz).

$^{19}\text{F}$  NMR (471 MHz,  $\text{CDCl}_3$ )  $\delta$  -67.5.

HRMS (ESI)  $m/z$  calcd for  $\text{C}_{14}\text{H}_9\text{F}_3\text{NS}^+$   $[\text{M}+\text{H}]^+$ : 280.0402, Found 280.0403.

The spectral data were in accordance with those reported in the literature.<sup>5</sup>

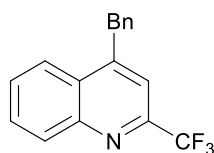

4-Benzyl-2-(trifluoromethyl)quinoline (**3ao**).

The compound (62.4 mg, 72%) was prepared from the general procedure **A** (petroleum ether : ethyl acetate = 100:1→50:1, v/v) as a pale yellow solid.

M. p. 86-88 °C.

$^1\text{H}$  NMR (500 MHz,  $\text{CDCl}_3$ )  $\delta$  8.26 (d,  $J = 8.4$  Hz, 1H), 8.10 (d,  $J = 8.5$  Hz, 1H), 7.80 (ddd,  $J = 8.4, 6.9, 1.2$  Hz, 1H), 7.67-7.62 (ddd,  $J = 8.4, 7.5, 1.0$  Hz, 1H), 7.50 (s, 1H), 7.36-7.31 (m, 2H), 7.31-7.26 (m, 1H), 7.21 (d,  $J = 7.4$  Hz, 2H), 4.51 (s, 2H).

$^{13}\text{C}$  NMR (126 MHz,  $\text{CDCl}_3$ )  $\delta$  149.7, 148.2 (q,  $^2J_{\text{C-F}} = 34$  Hz), 147.8, 138.2, 131.3, 130.8, 129.3, 129.2, 128.9, 128.6, 127.3, 124.3, 122.0 (q,  $^1J_{\text{C-F}} = 274$  Hz), 117.7 (q,  $^3J_{\text{C-F}} = 2$  Hz), 38.8.

$^{19}\text{F}$  NMR (471 MHz,  $\text{CDCl}_3$ )  $\delta$  -67.5.

HRMS (ESI)  $m/z$  calcd for  $\text{C}_{17}\text{H}_{13}\text{F}_3\text{NO}^+$   $[\text{M}+\text{H}]^+$ : 288.0995, Found 288.0996.

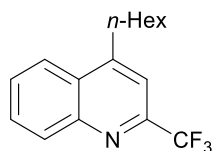

4-Hexyl-2-(trifluoromethyl)quinoline (**3ap**).

The compound (65.4 mg, 77%) was prepared from the general procedure **A** (petroleum ether : ethyl acetate = 100:1→50:1, v/v) as a brown solid.

M. p. 52-54 °C.

$^1\text{H}$  NMR (500 MHz,  $\text{CDCl}_3$ )  $\delta$  8.21 (d,  $J = 8.5$  Hz, 1H), 8.06 (d,  $J = 8.5$  Hz, 1H), 7.76 (ddd,  $J = 8.6, 7.6, 1.4$  Hz, 1H), 7.64 (ddd,  $J = 8.6, 8.2, 1.2$  Hz, 1H), 7.55 (s, 1H), 3.15-3.04 (t,  $J = 7.9$  Hz, 2H), 1.76 (m, 2H), 1.45 (m, 2H), 1.38-1.28 (m, 4H), 0.90 (t,  $J = 7.0$  Hz, 3H).

$^{13}\text{C}$  NMR (126 MHz,  $\text{CDCl}_3$ )  $\delta$  151.7, 147.7 (q,  $^2J_{\text{C-F}} = 34$  Hz), 147.4, 131.0, 130.3, 128.3, 128.3, 123.6, 121.9 (q,  $^1J_{\text{C-F}} = 276$  Hz), 116.3 (q,  $^3J_{\text{C-F}} = 2$  Hz), 32.5, 31.7, 30.1, 29.4, 22.6, 14.1.

$^{19}\text{F}$  NMR (471 MHz,  $\text{CDCl}_3$ )  $\delta$  -67.6.

HRMS (ESI)  $m/z$  calcd for  $\text{C}_{16}\text{H}_{19}\text{F}_3\text{NO}^+$   $[\text{M}+\text{H}]^+$ : 282.1464, Found 282.1466.

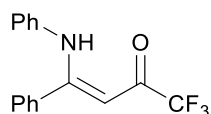

(*Z*)-1,1,1-trifluoro-4-phenyl-4-(phenylamino)but-3-en-2-one (**5**).

The compound (70.8 mg, 81%) was prepared from the general procedure **A** (petroleum ether : ethyl acetate = 100:1  $\rightarrow$  30:1, v/v) as a yellow oil.

$^1\text{H}$  NMR (500 MHz,  $\text{CDCl}_3$ )  $\delta$  12.55 (br s, 1H), 7.42 (m, 1H), 7.37-7.30 (m, 4H), 7.18 (dd,  $J = 7.7, 7.7$  Hz, 2H), 7.11 (dd,  $J = 7.4, 7.7$  Hz, 1H), 6.84 (d,  $J = 7.7$  Hz, 2H), 5.73 (s, 1H).

$^{13}\text{C}$  NMR (126 MHz,  $\text{CDCl}_3$ )  $\delta$  177.6 (q,  $^2J_{\text{C-F}} = 34$  Hz), 166.6, 138.0, 134.0, 130.8, 129.1, 128.8, 128.4, 126.1, 124.1, 117.6 (q,  $^1J_{\text{C-F}} = 288$  Hz), 92.8 (q,  $^3J_{\text{C-F}} = 1.0$  Hz).

$^{19}\text{F}$  NMR (471 MHz,  $\text{CDCl}_3$ )  $\delta$  -76.6.

HRMS (ESI)  $m/z$  calcd for  $\text{C}_{16}\text{H}_{13}\text{F}_3\text{NO}^+$   $[\text{M}+\text{H}]^+$ : 292.0944, Found 292.0946.

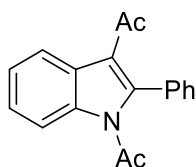

1,1'-(2-Phenyl-1H-indole-1,3-diyl)bis(1-ethanone) (**10**).

The compound (14.0 mg, 16%) was prepared from the general procedure **A** (petroleum ether : ethyl acetate = 100:1  $\rightarrow$  30:1, v/v) as a pale yellow solid.

M. p. 126-130 °C.

$^1\text{H}$  NMR (500 MHz,  $\text{CDCl}_3$ )  $\delta$  8.37-8.22 (m, 2H), 7.61-7.54 (m, 3H), 7.64-7.50 (m, 2H), 7.44-7.36 (m, 2H), 1.94 (s, 3H), 1.93 (s, 3H).

$^{13}\text{C}$  NMR (126 MHz,  $\text{CDCl}_3$ )  $\delta$  196.5, 171.7, 142.3, 136.2, 133.0, 130.8, 130.5, 129.2, 127.1, 126.1, 125.0, 122.2, 121.9, 115.6, 30.9, 27.9.

HRMS (ESI)  $m/z$  calcd for  $\text{C}_{18}\text{H}_{16}\text{NO}_2^+$   $[\text{M}+\text{H}]^+$ : 278.1176, Found 278.1179.

## 5. Experiments with scale-up reaction

### (A) Rhodium-catalysed [3+3] annulation between aniline **1a** and $\text{CF}_3$ -ynone **2a**

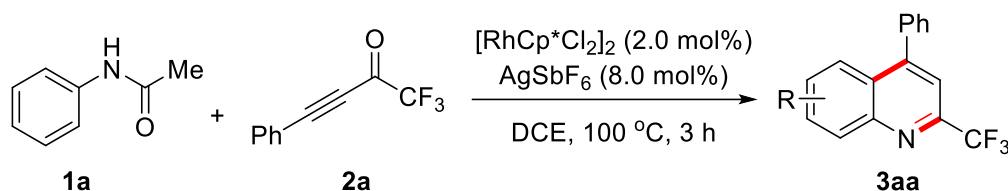

The mixture of acetanilide (**1a**, 0.54 g, 4.0 mmol, 1.0 equiv),  $\text{CF}_3$ -ynone **2a** (0.87 g, 4.4 mmol, 1.1 equiv),  $[\text{RhCp}^*\text{Cl}_2]_2$  (49.4 mg, 0.08 mmol) and  $\text{AgSbF}_6$  (55.0 mg, 0.16 mmol) in DCE (13.0 mL) was stirred at 100 °C under  $\text{N}_2$  for 3 h. After reaction completion, the solvent was removed under reduced pressure and the resulting residue was purified by column chromatography on silica gel (petroleum ether : ethyl acetate = 100:1→50:1, v/v) afforded the corresponding 2-trifluoromethylquinoline product **3aa** (1.002 g, 91%) as a yellow solid.

### (B) Rhodium-catalysed one-pot [3+3] annulation between anilide **4a** and trifluoromethyl ynone **2a**

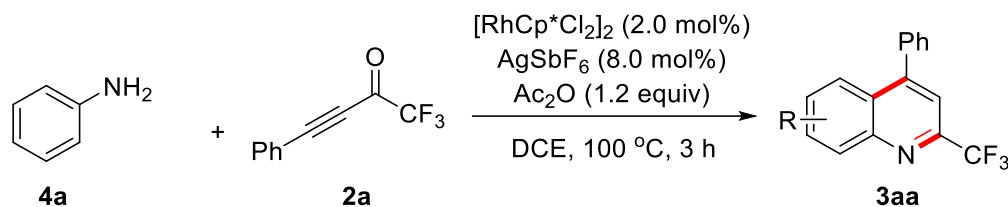

The mixture of anilide (**4a**, 0.54 g, 4.0 mmol, 1.0 equiv),  $\text{Ac}_2\text{O}$  (0.49 g, 4.8 mmol, 1.2 equiv),  $\text{CF}_3$ -ynone **2a** (0.87 g, 4.4 mmol, 1.1 equiv),  $[\text{RhCp}^*\text{Cl}_2]_2$  (49.4 mg, 0.08 mmol) and  $\text{AgSbF}_6$  (55.0 mg, 0.16 mmol) in DCE (13.0 mL) was stirred at 100 °C under  $\text{N}_2$  for 3 h. After reaction completion, the solvent was removed under reduced pressure and the resulting residue was purified by column chromatography on silica gel (petroleum ether : ethyl acetate = 100:1→50:1, v/v) afforded the corresponding 2-trifluoromethylquinoline product **3aa** (0.934 g, 85%) as a yellow solid.

## 6. Intermolecular competition experiments

### (A) Intermolecular competition experiment with anilides **1b** and **1h**

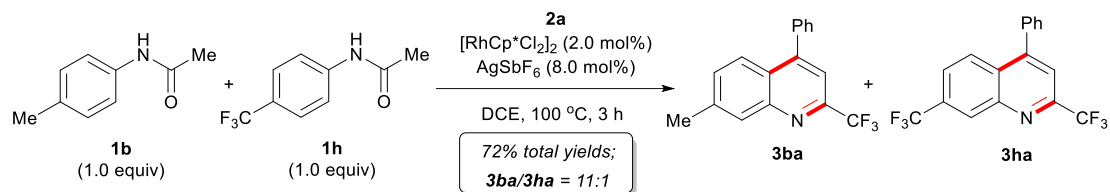

The mixture of *N*-(*p*-tolyl)acetamide (**1b**, 44.7 mg, 0.30 mmol, 1.0 equiv), *N*-{4-(trifluoromethyl)phenyl}acetamide (**1h**, 60.9 mg, 0.30 mmol, 1.0 equiv), 1,1,1-trifluoro-4-phenylbut-3-yn-2-one (**2a**, 59.4 mg, 0.30 mmol, 1.0 equiv),  $[\text{RhCp}^*\text{Cl}_2]_2$  (3.7 mg, 0.006 mmol) and  $\text{AgSbF}_6$  (8.2 mg, 0.024 mmol) in DCE (1.0 mL) was stirred at 100 °C under  $\text{N}_2$  for 3 h. After reaction completion, the solvent was removed under reduced pressure. The resulting residue was purified by column chromatography on silica gel on silica gel (petroleum ether : ethyl acetate = 100:1→50:1, v/v) to afford **3ba** (56.8 mg, 66%) as a yellow oil and **3ha** (6.9 mg, 6%) as a white solid.

### (B) Intermolecular competition experiment with $\text{CF}_3$ -ynones **2b** and **2f**

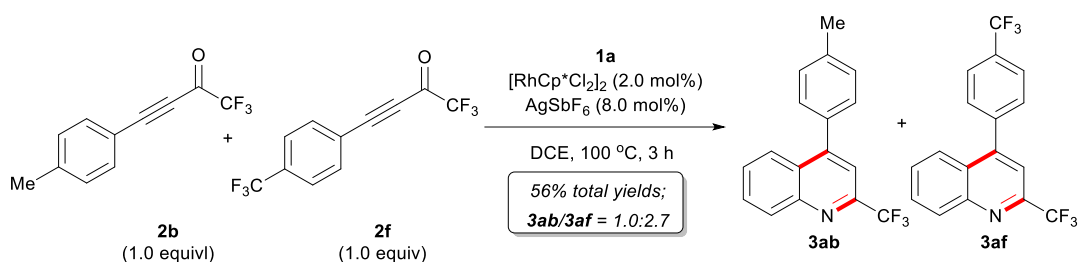

The mixture of *N*-phenylacetamide (**1a**, 40.5 mg, 0.30 mmol, 1.0 equiv), 1,1,1-trifluoro-4-(*p*-tolyl)but-3-yn-2-one (**2b**, 63.7 mg, 0.30 mmol, 1.0 equiv), 1,1,1-trifluoro-4-{4-(trifluoromethyl)phenyl}but-3-yn-2-one (**2f**, 79.8 mg, 0.30 mmol, 1.0 equiv),  $[\text{RhCp}^*\text{Cl}_2]_2$  (3.7 mg, 0.006 mmol) and  $\text{AgSbF}_6$  (8.2 mg, 0.024 mmol) in DCE (1.0 mL) was stirred at 100 °C under  $\text{N}_2$  for 3 h. After reaction completion, the solvent was removed under reduced pressure. The resulting residue was purified by column chromatography on silica gel on silica gel (petroleum ether : ethyl acetate = 100:1→50:1, v/v) to afford **3ab** (13.2 mg, 15%) as a yellow oil and **3af** (42.9 mg, 41%) as a white solid.



## 7. Deuterium-labeling experiments

### (A) Rhodium-catalyzed [3+3] annulation of anilide [D]<sub>5</sub>-**1a** with CF<sub>3</sub>-ynone **2a** in the presence of DCE/*t*-AmOH

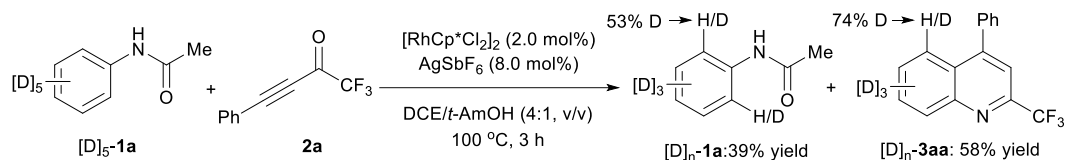

The mixture of anilide [D]<sub>5</sub>-**1a** (42.0 mg, 0.30 mmol, 1.0 equiv), 1,1,1-trifluoro-4-phenylbut-3-yn-2-one (**2a**, 65.4 mg, 0.33 mmol, 1.1 equiv), [RhCp\*Cl<sub>2</sub>]<sub>2</sub> (3.7 mg, 0.006 mmol) and AgSbF<sub>6</sub> (8.2 mg, 0.024 mmol) in DCE/*t*-AmOH (4:1, v/v, 1.0 mL) was stirred at 100 °C under N<sub>2</sub> for 3 h. After reaction completion, the solvent was removed under reduced pressure. The resulting residue was purified by column chromatography on silica gel on silica gel (petroleum ether : ethyl acetate = 100:1→50:1→10:1, v/v) to afford [D]<sub>n</sub>-**3aa** (48.7 mg, 58%) as a yellow solid and [D]<sub>n</sub>-**1a** (16.6 mg, 39%) as a white solid. The deuterium incorporation was estimated by <sup>1</sup>H-NMR spectroscopy.

### (B) Kinetic isotope effect studies

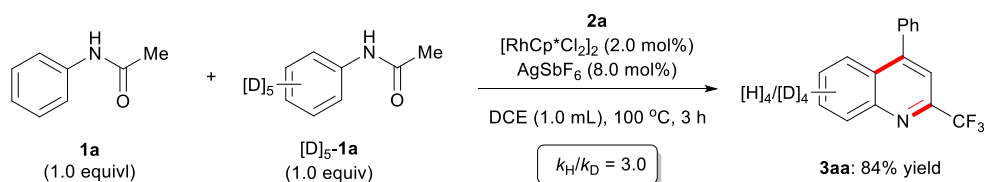

The mixture of anilide **1a** (40.5 mg, 0.30 mmol, 1.0 equiv), anilide [D]<sub>5</sub>-**1a** (42.0 mg, 0.30 mmol, 1.0 equiv), 1,1,1-trifluoro-4-phenylbut-3-yn-2-one (**2a**, 59.4 mg, 0.30 mmol, 1.0 equiv), [RhCp\*Cl<sub>2</sub>]<sub>2</sub> (3.7 mg, 0.006 mmol) and AgSbF<sub>6</sub> (8.2 mg, 0.024 mmol) in DCE (1.0 mL) was stirred at 100 °C under N<sub>2</sub> for 3 h. After reaction completion, the solvent was removed under reduced pressure. The resulting residue was purified by column chromatography on silica gel (petroleum ether : ethyl acetate = 100:1→50:1, v/v) to afford [D]<sub>n</sub>-**3aa** (69.1 mg, 84%) as a yellow solid. The deuterium incorporation was estimated by <sup>1</sup>H-NMR spectroscopy.

## 8. NMR spectra of compounds 3, 5 and 10.

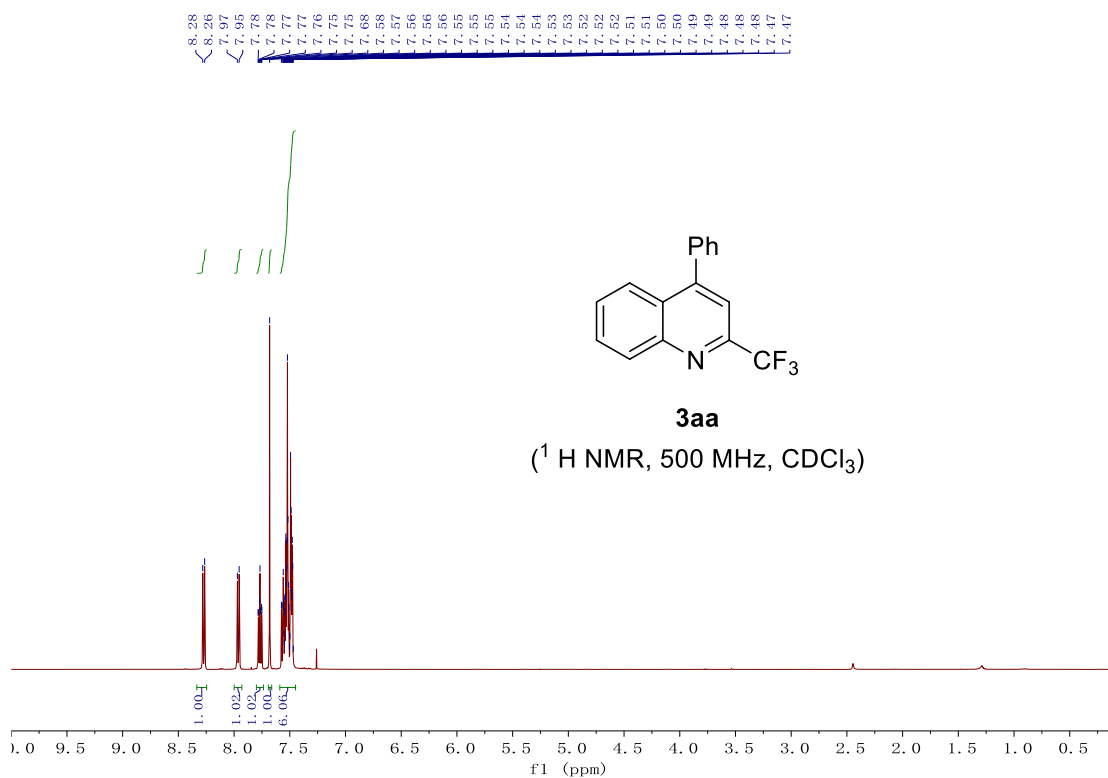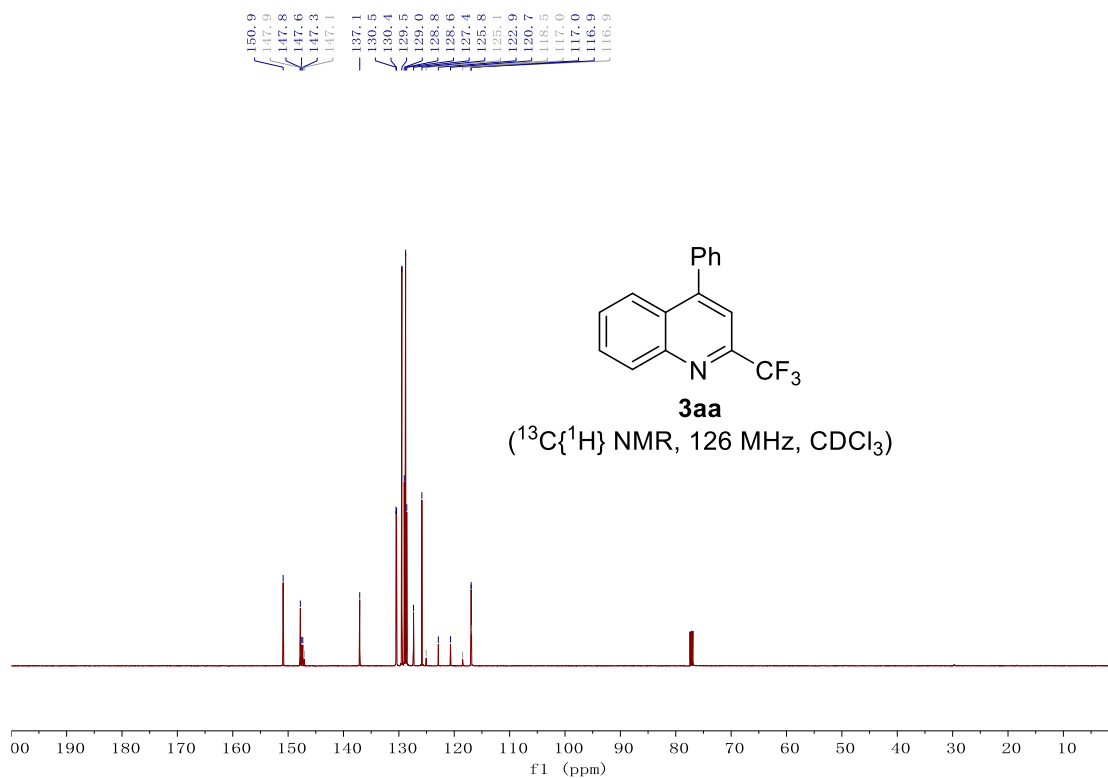

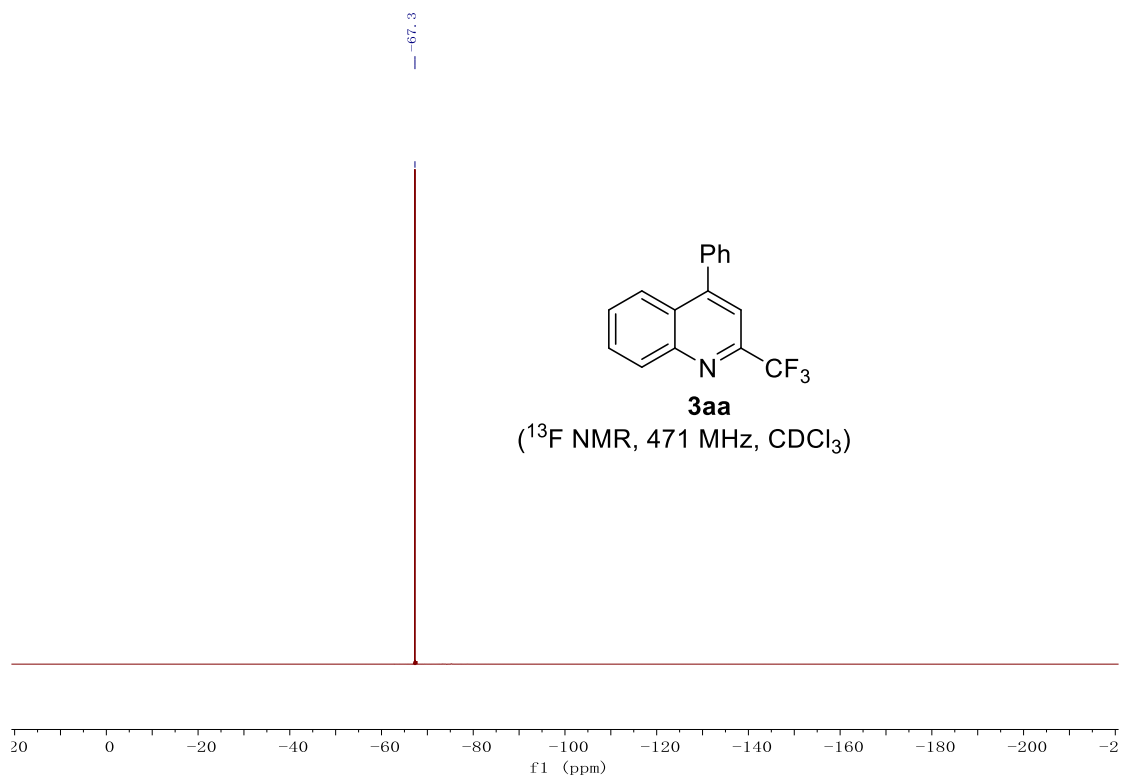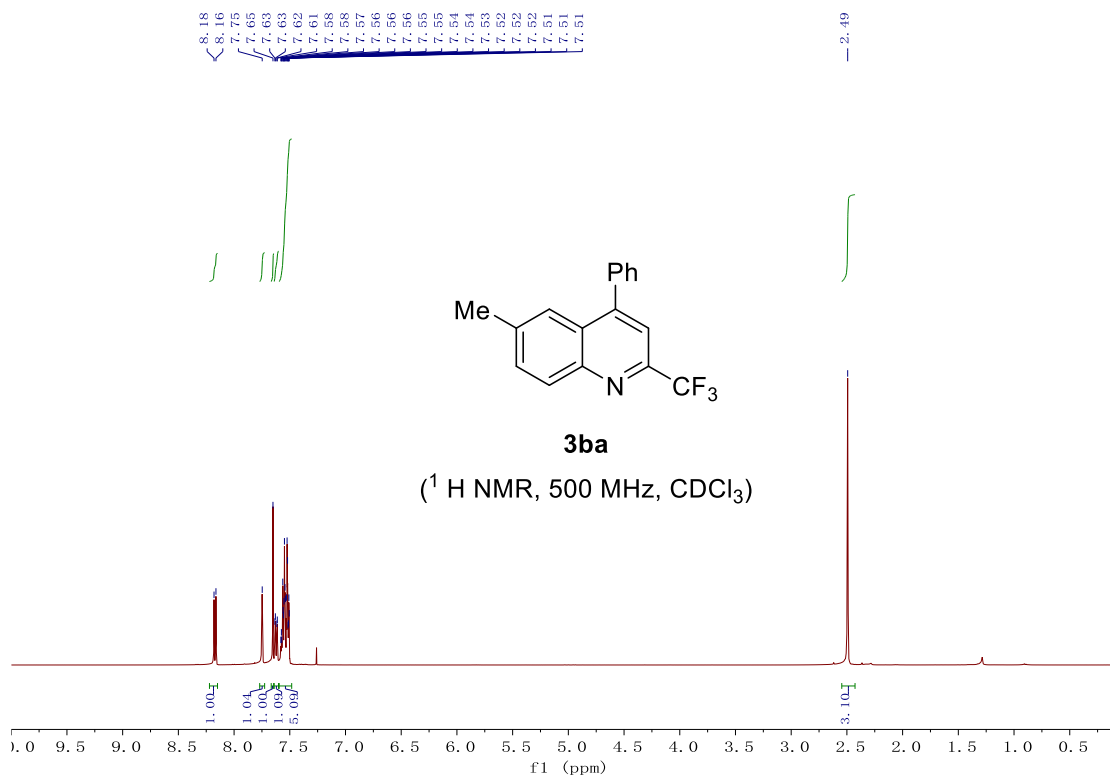

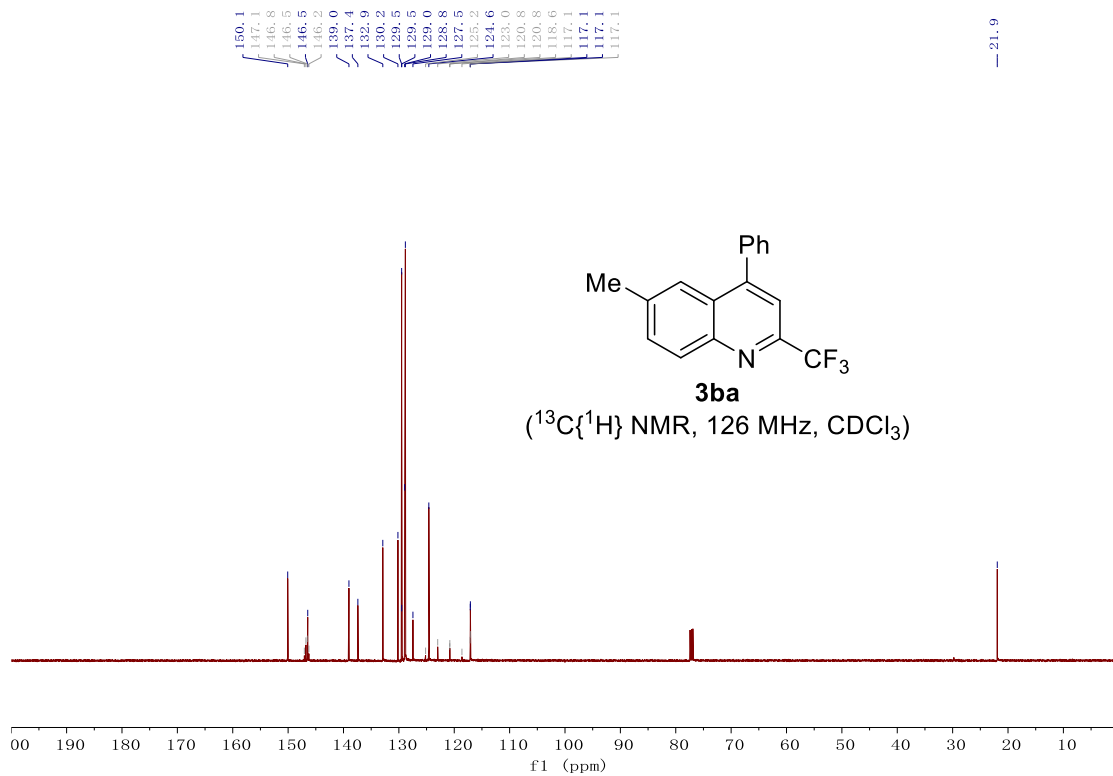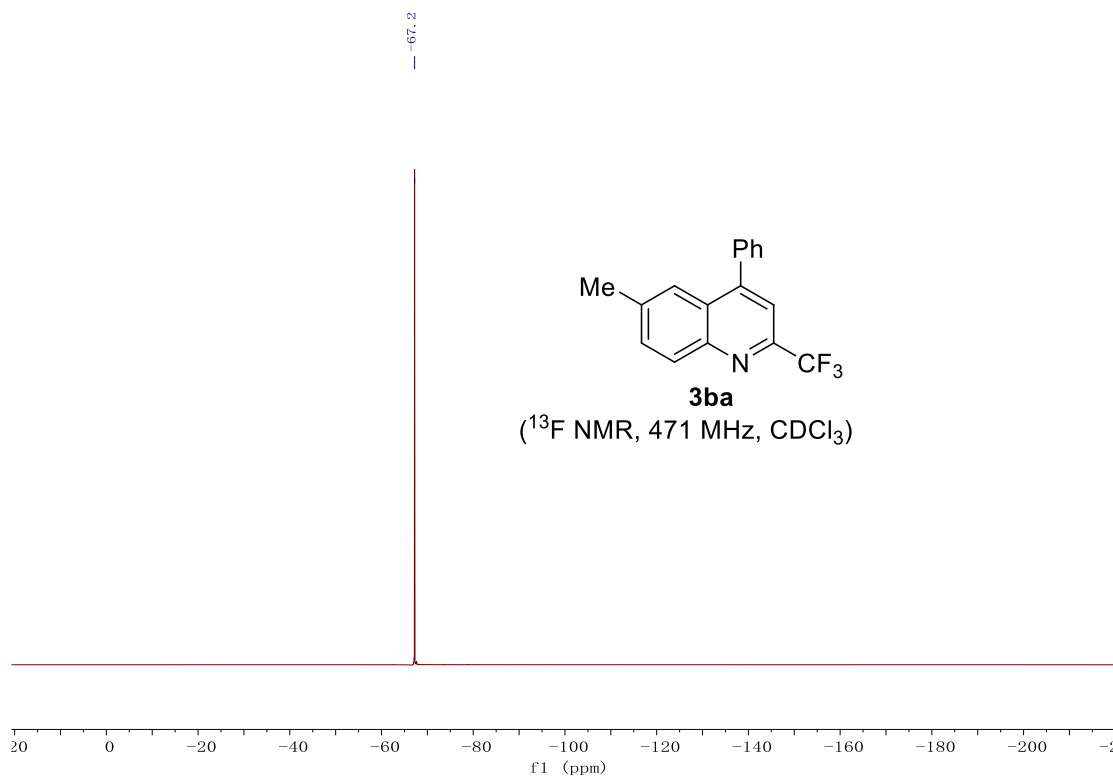

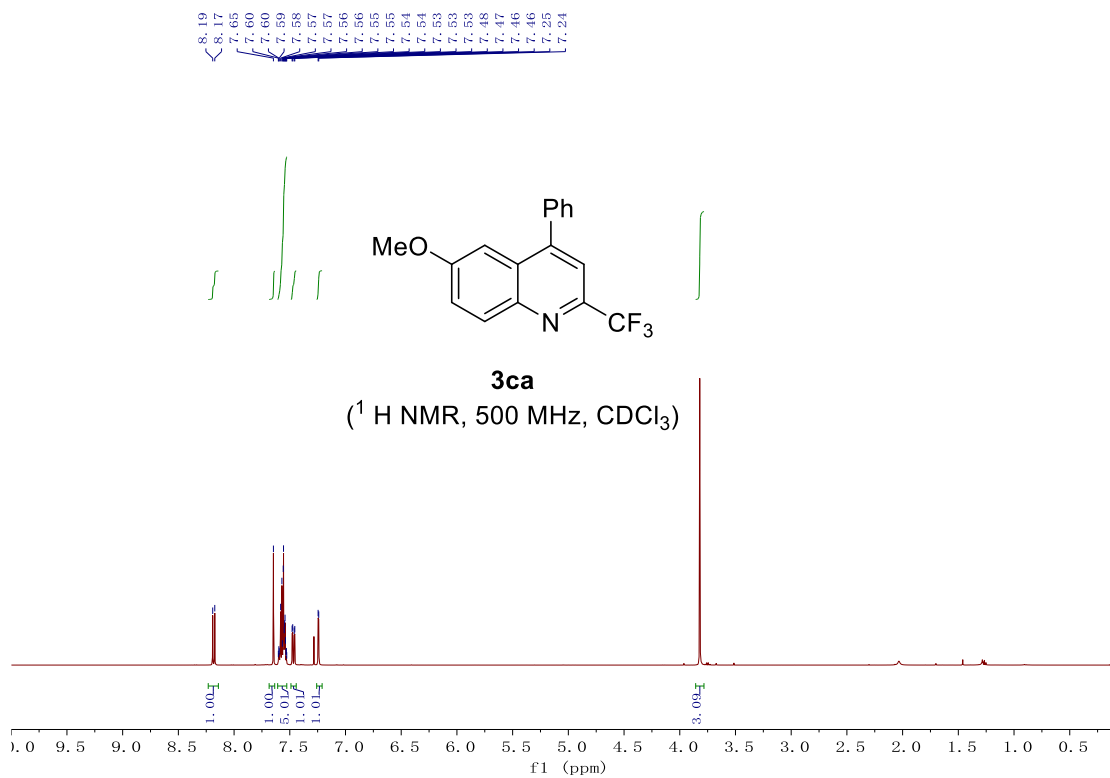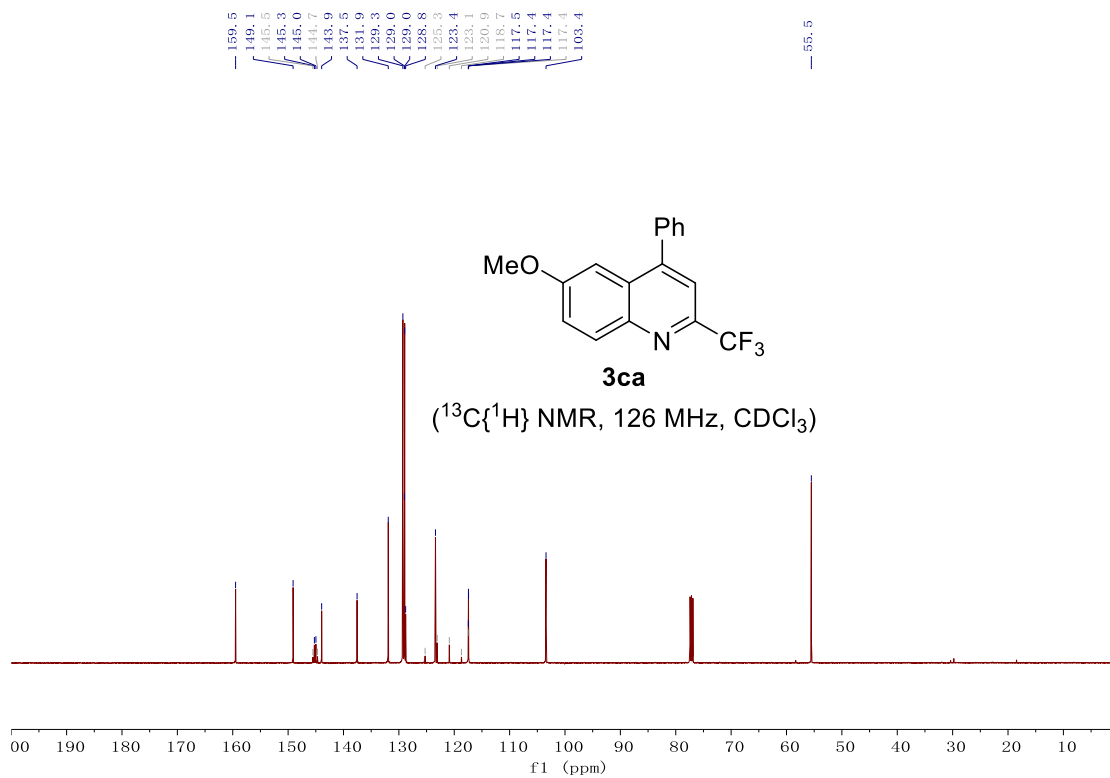

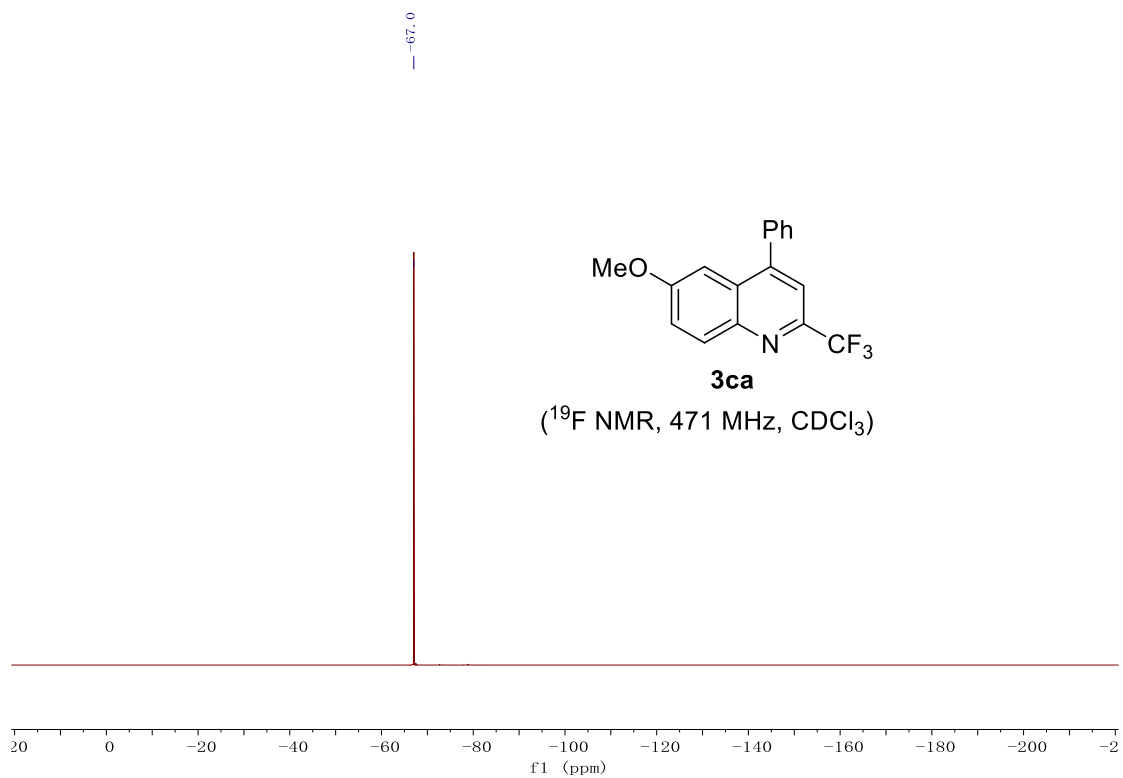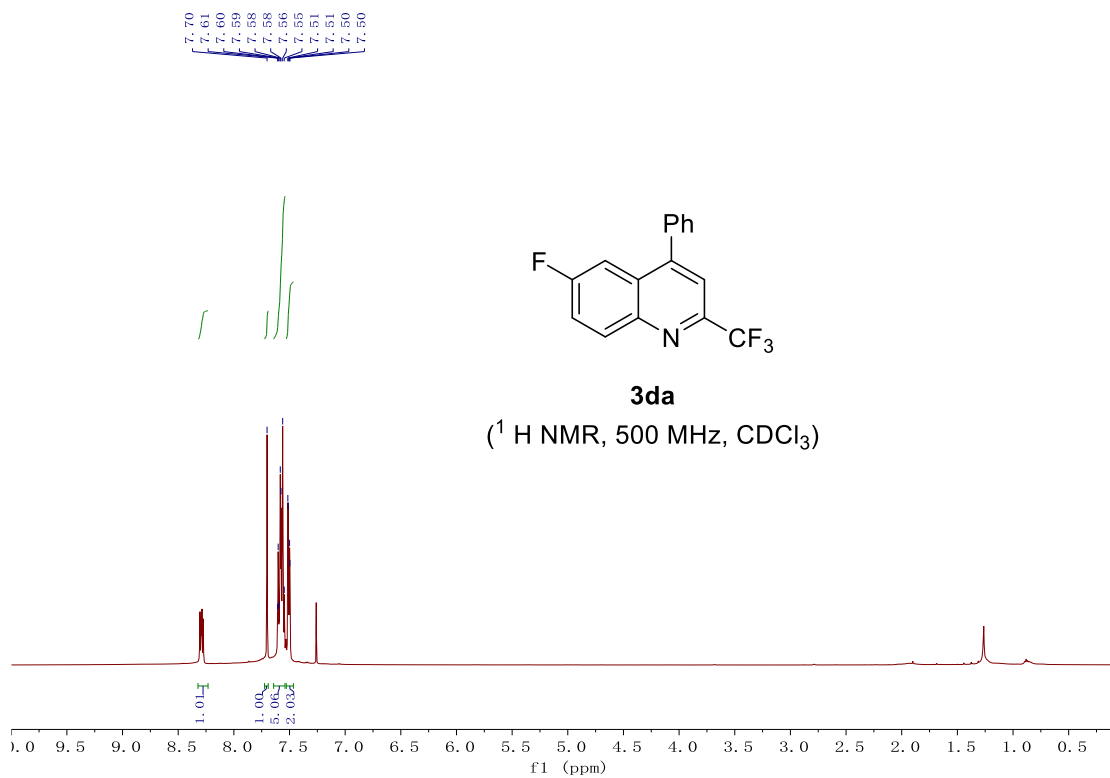

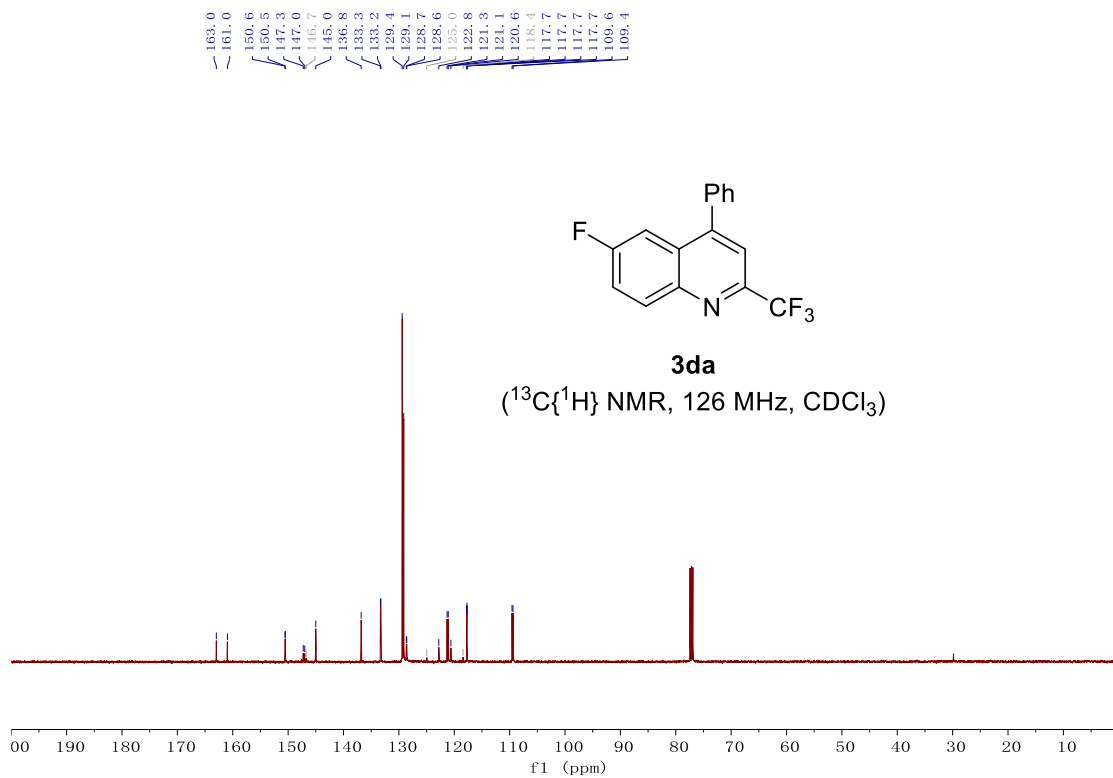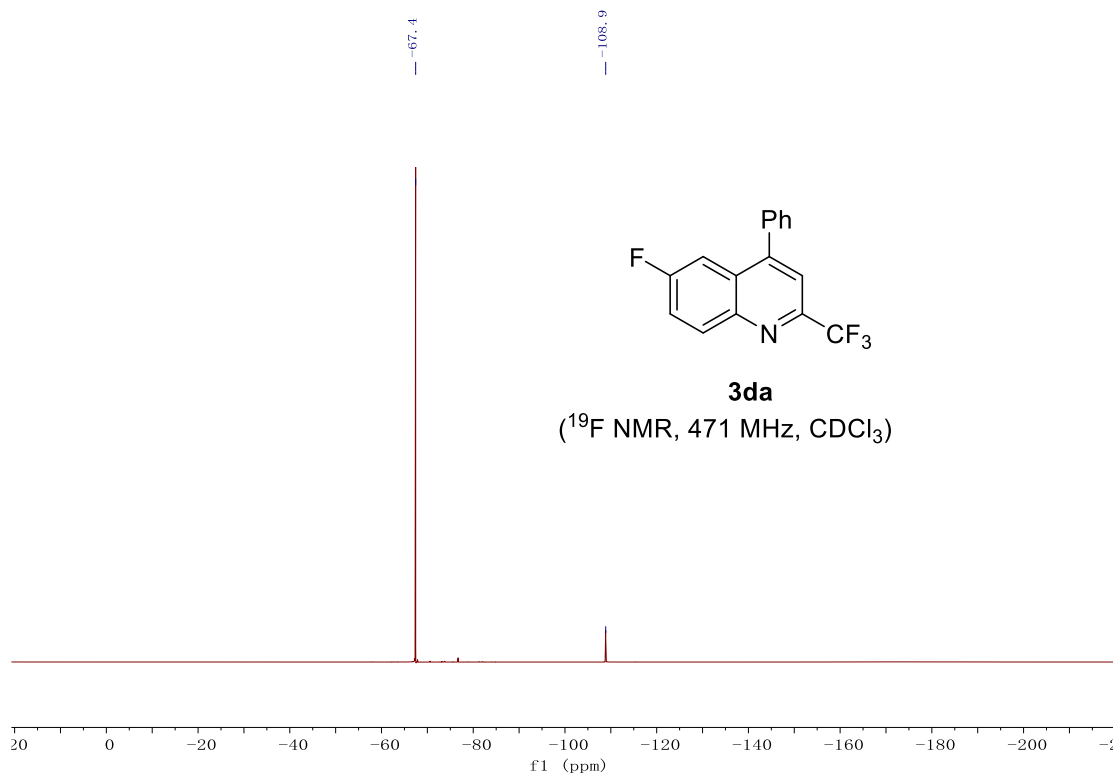

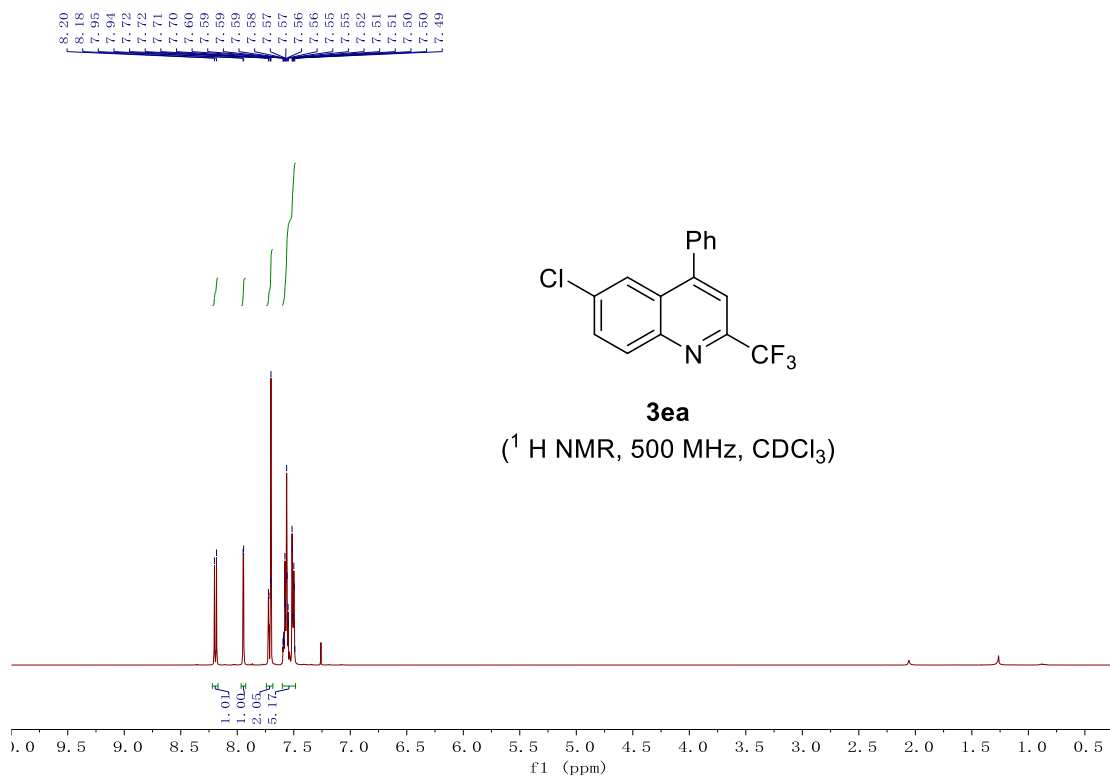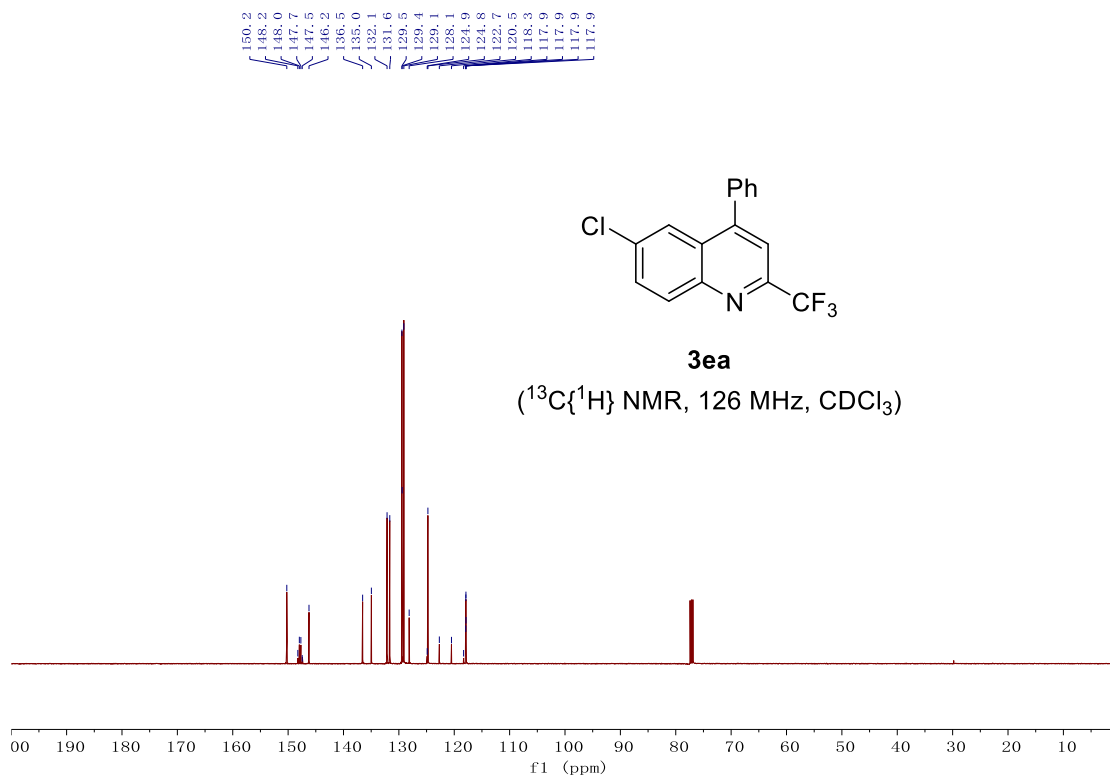



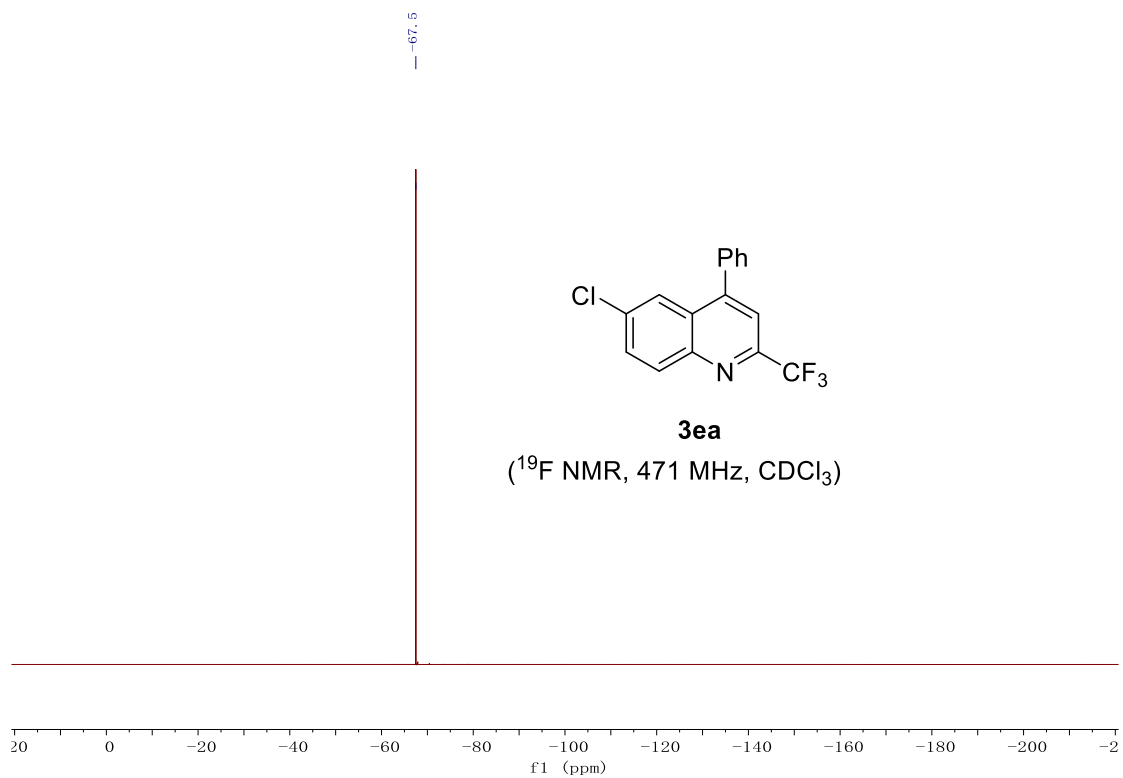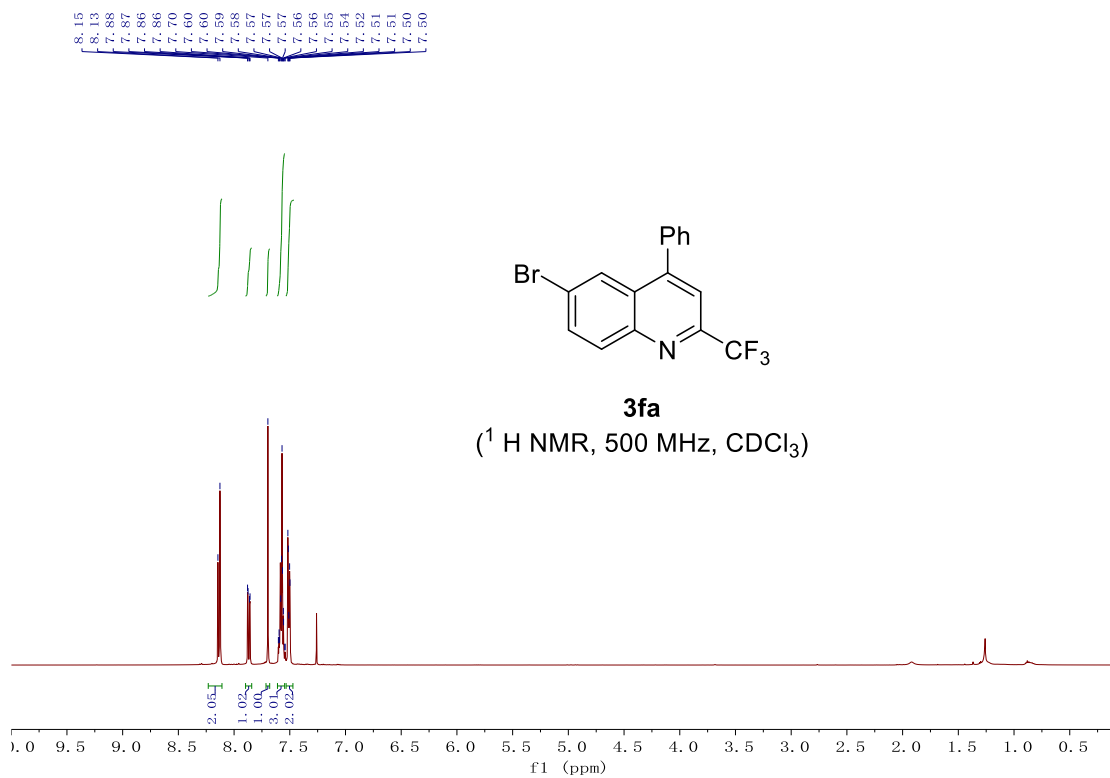

150.2  
148.4  
148.1  
147.8  
147.6  
146.5  
136.5  
134.3  
132.2  
129.5  
129.1  
128.6  
128.2  
124.9  
123.4  
122.7  
120.5  
118.3  
118.0  
117.9  
117.9

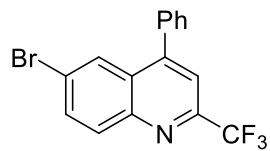

**3fa**

( $^{13}\text{C}\{^1\text{H}\}$  NMR, 126 MHz,  $\text{CDCl}_3$ )

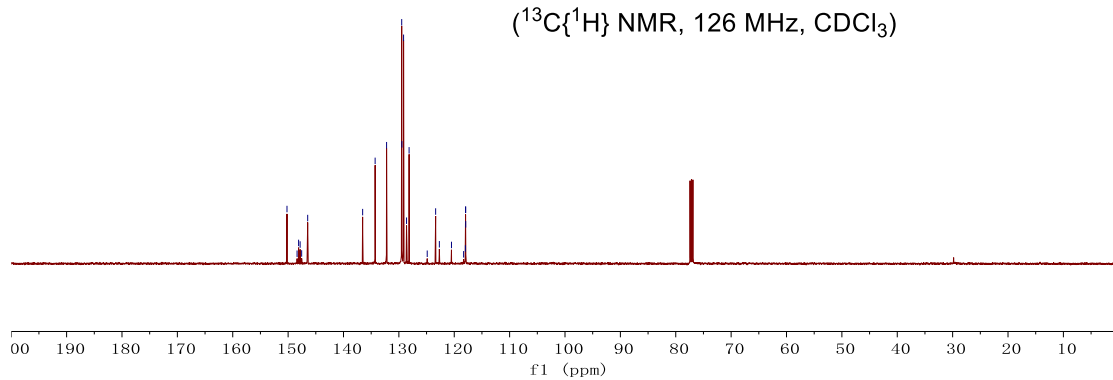

-67.5

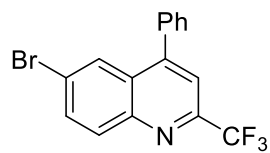

**3fa**

( $^{19}\text{F}$  NMR, 471 MHz,  $\text{CDCl}_3$ )

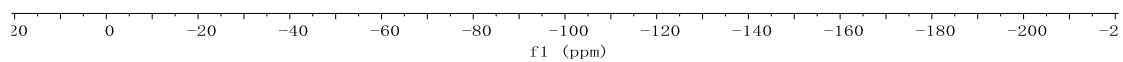

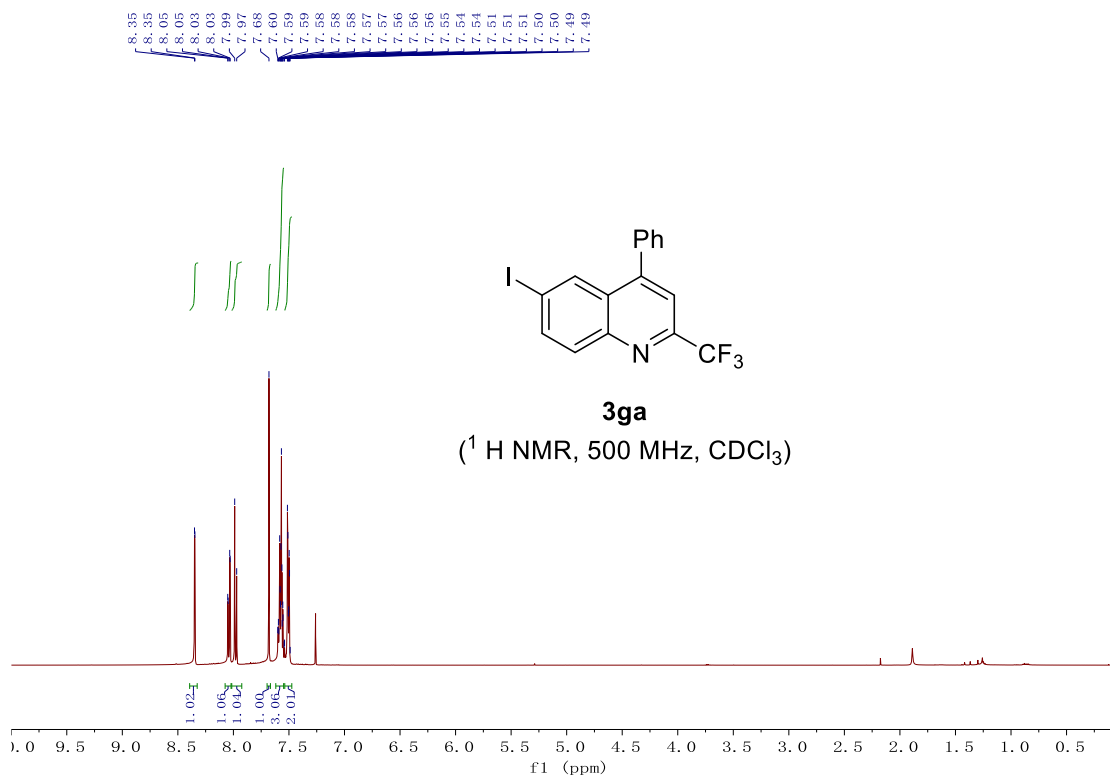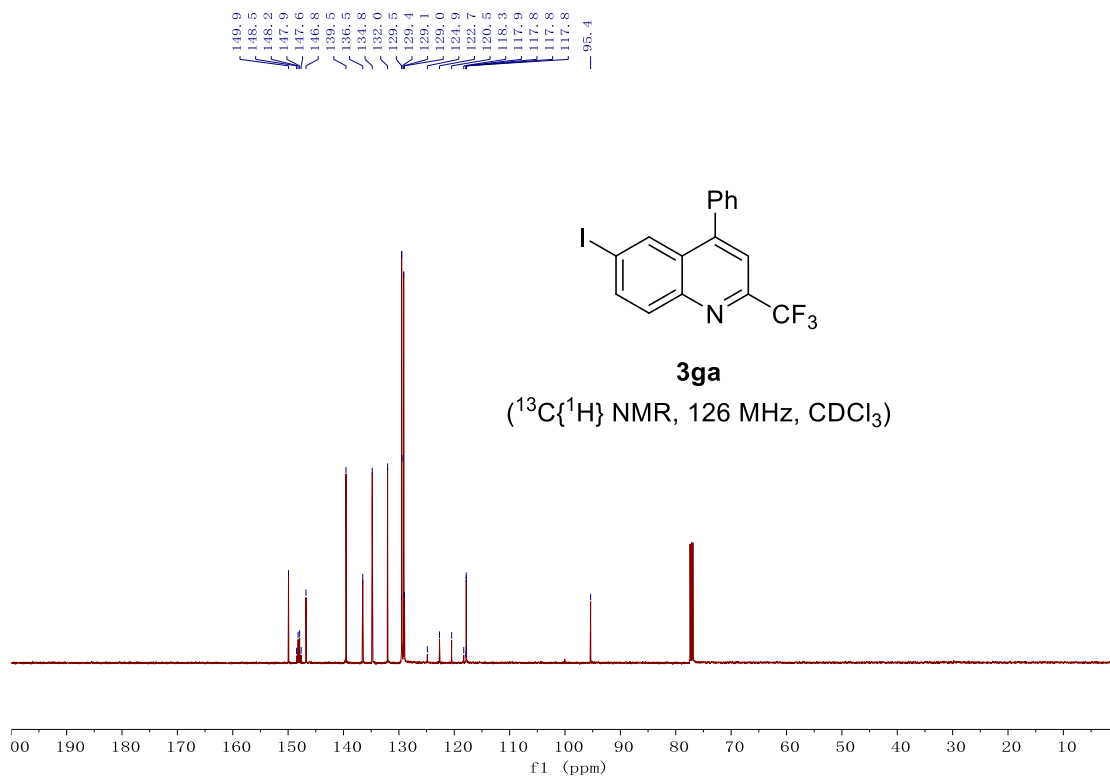

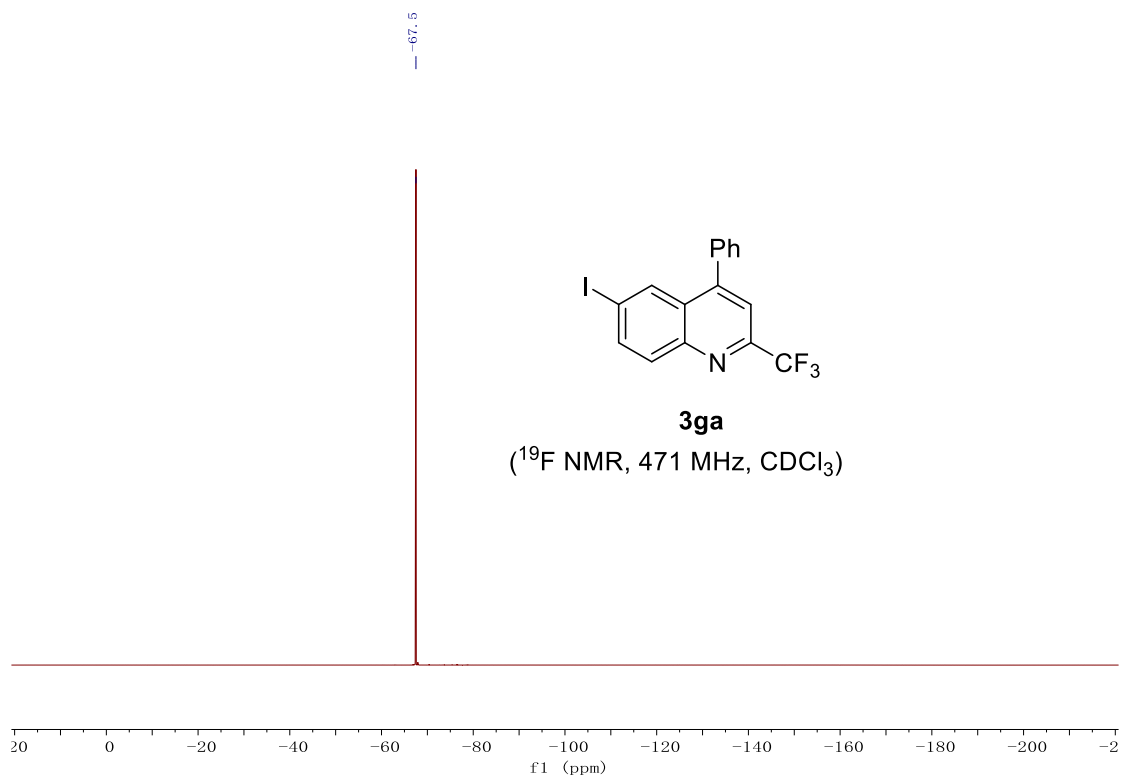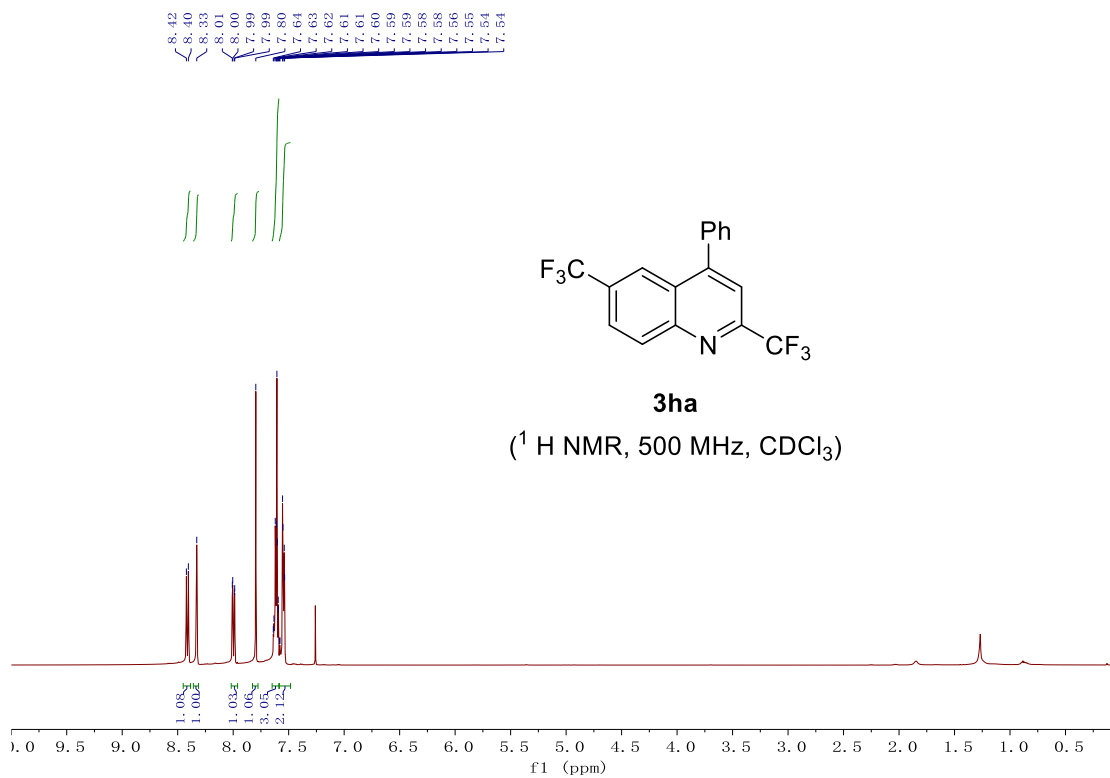

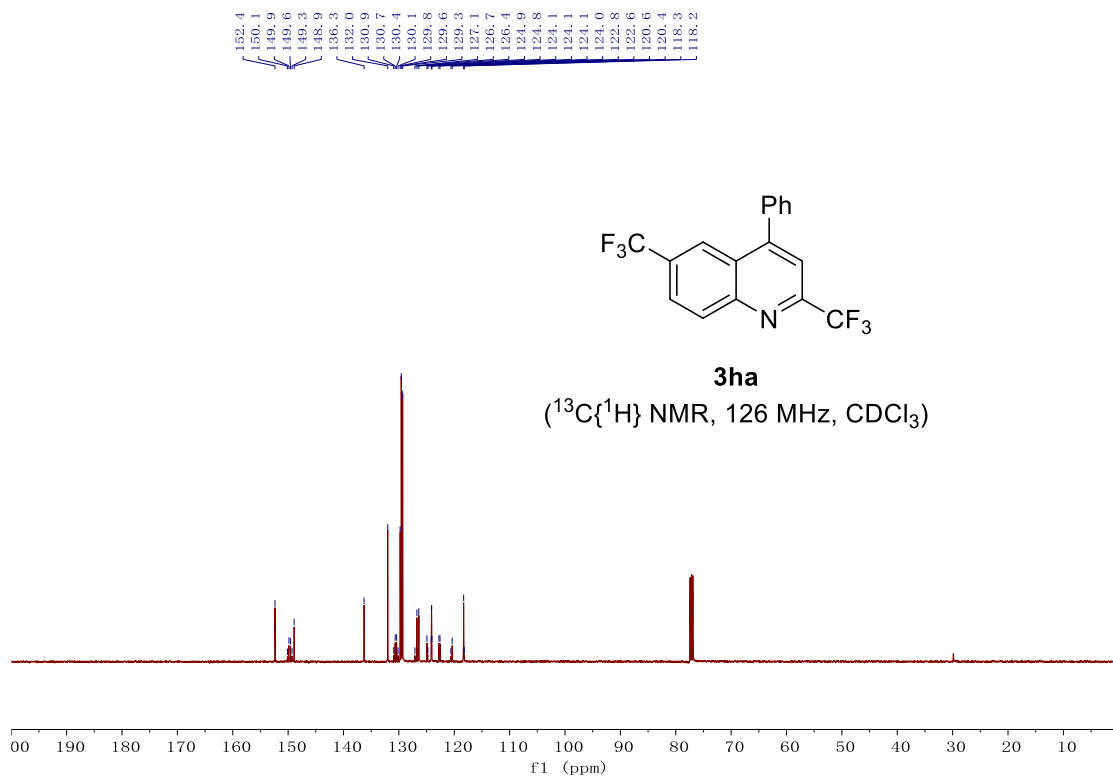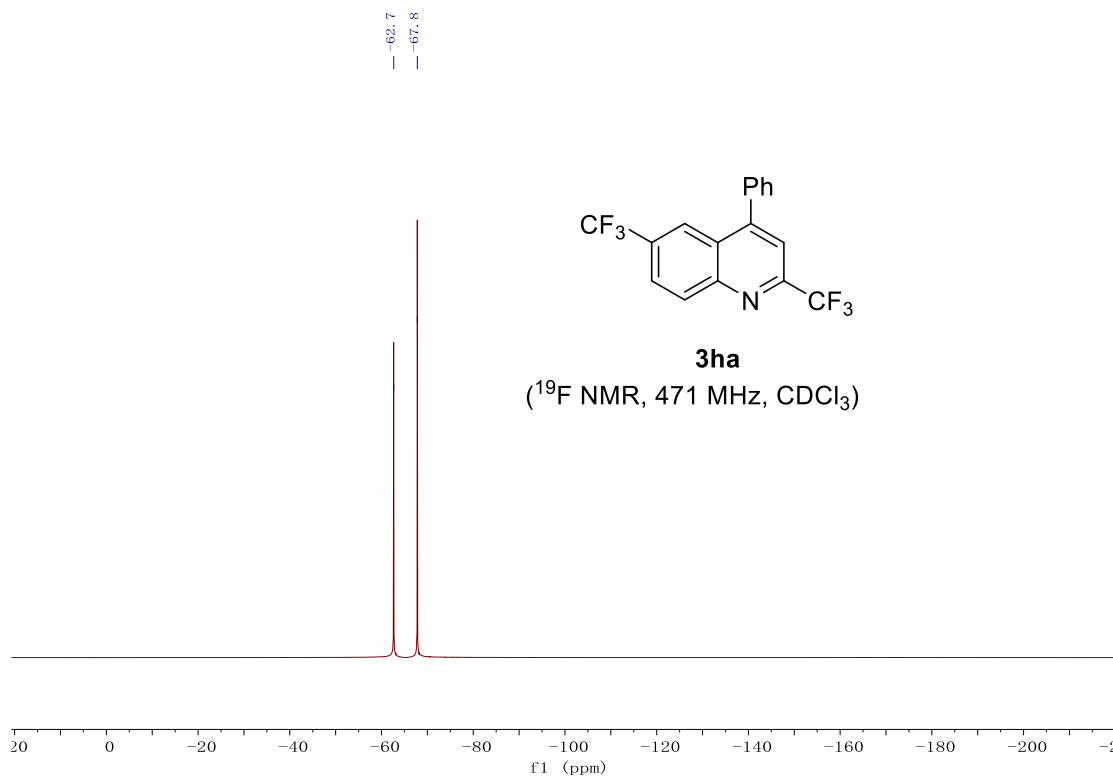

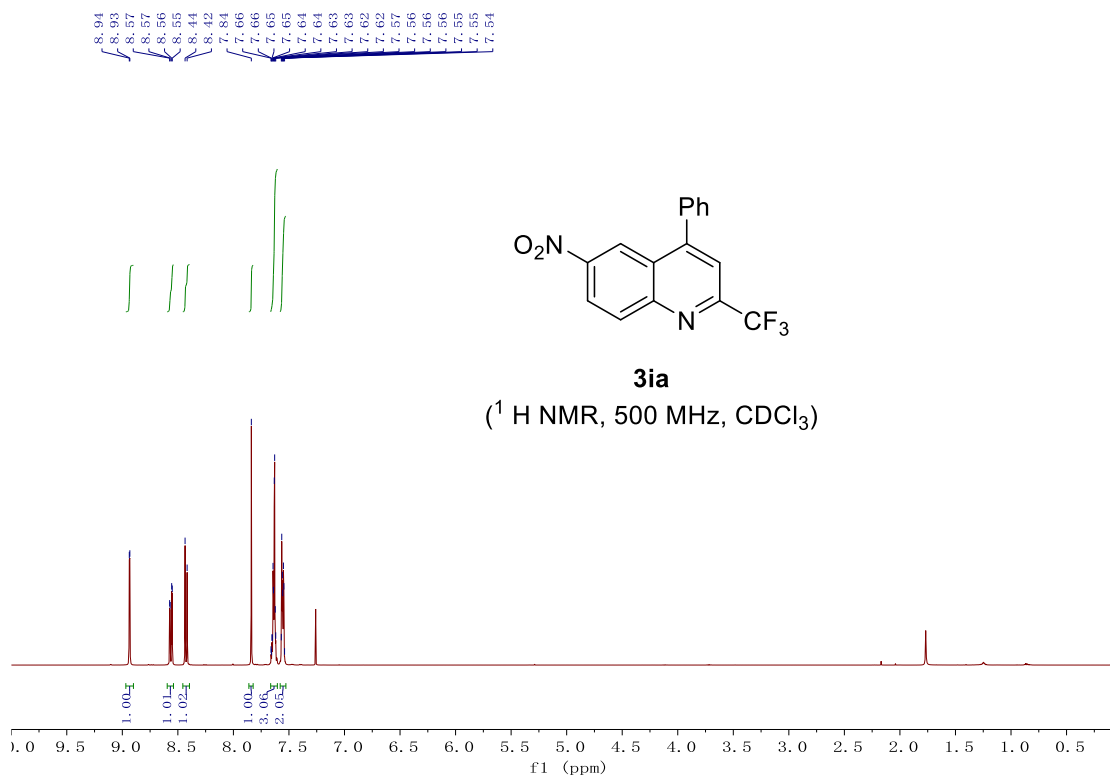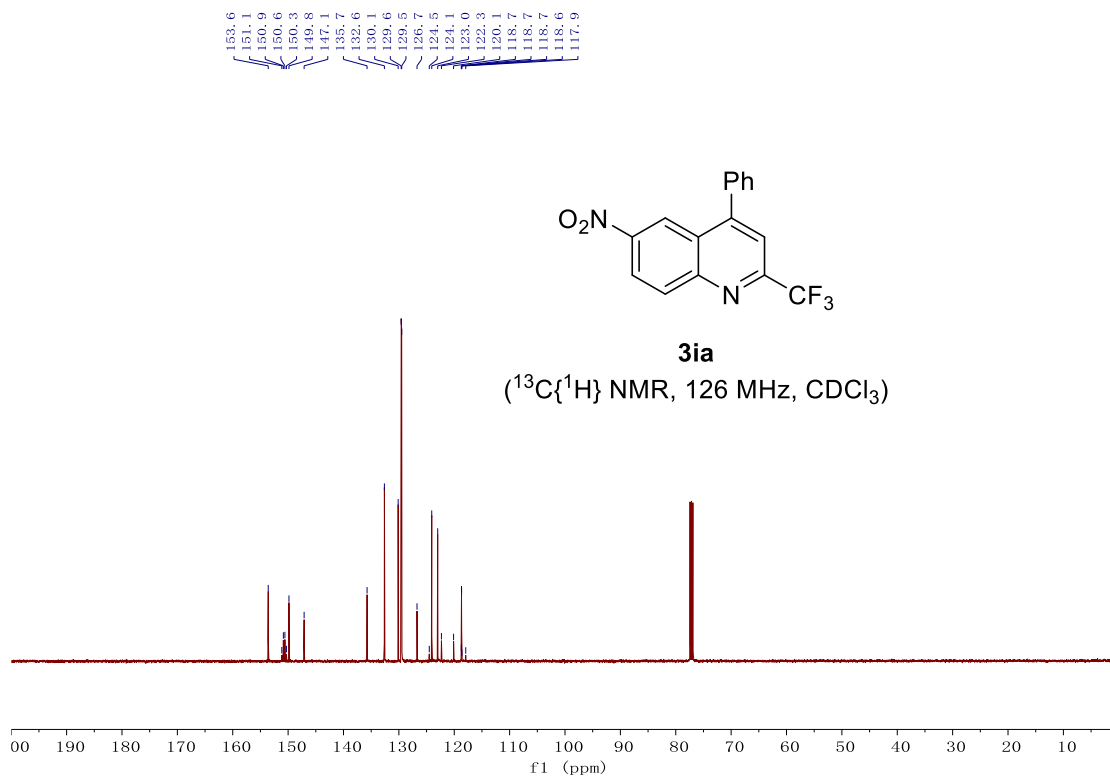

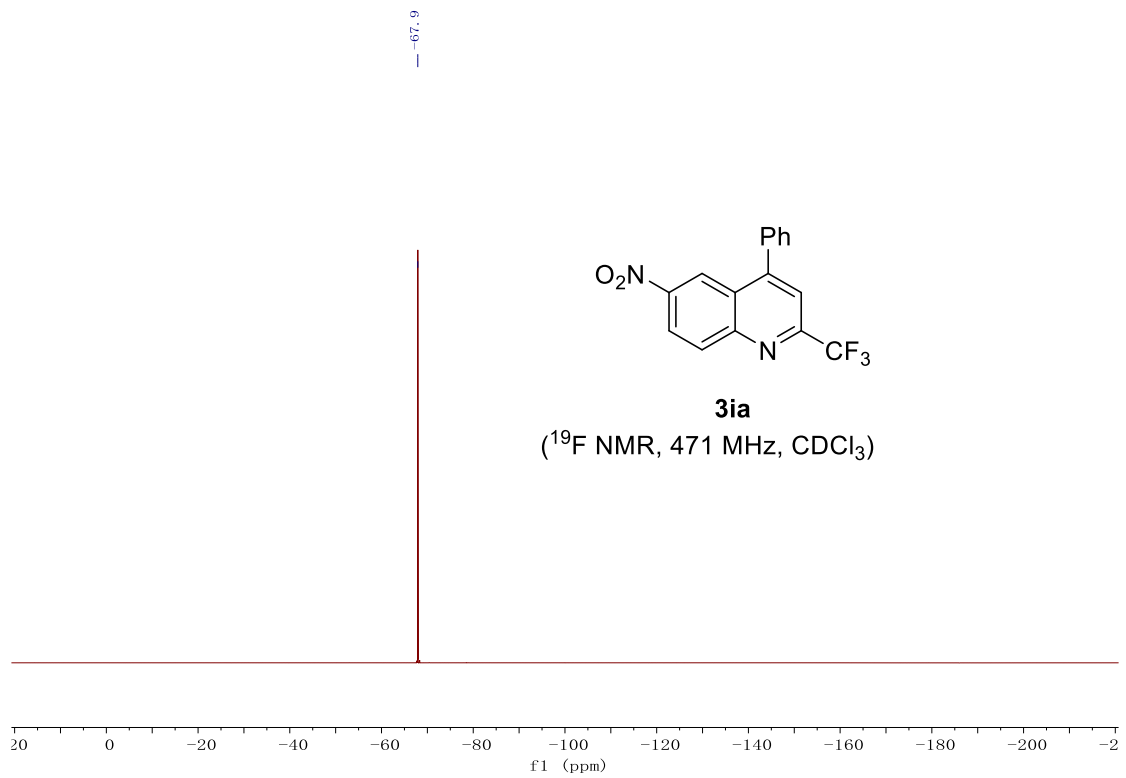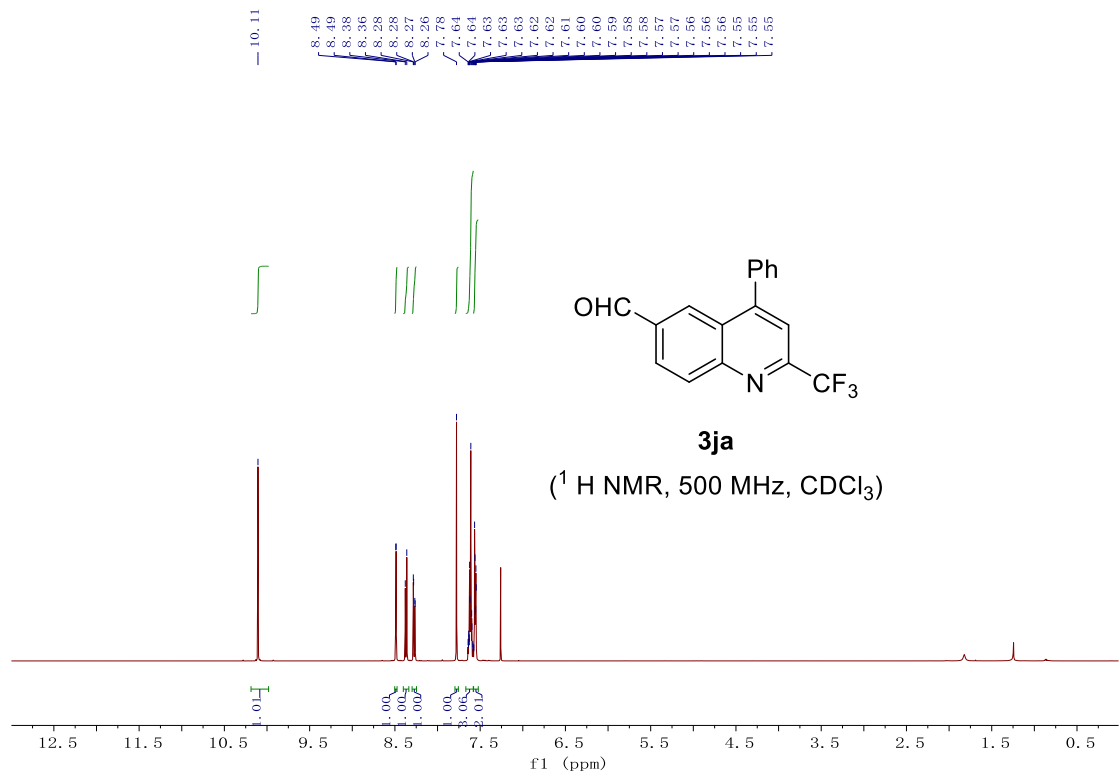

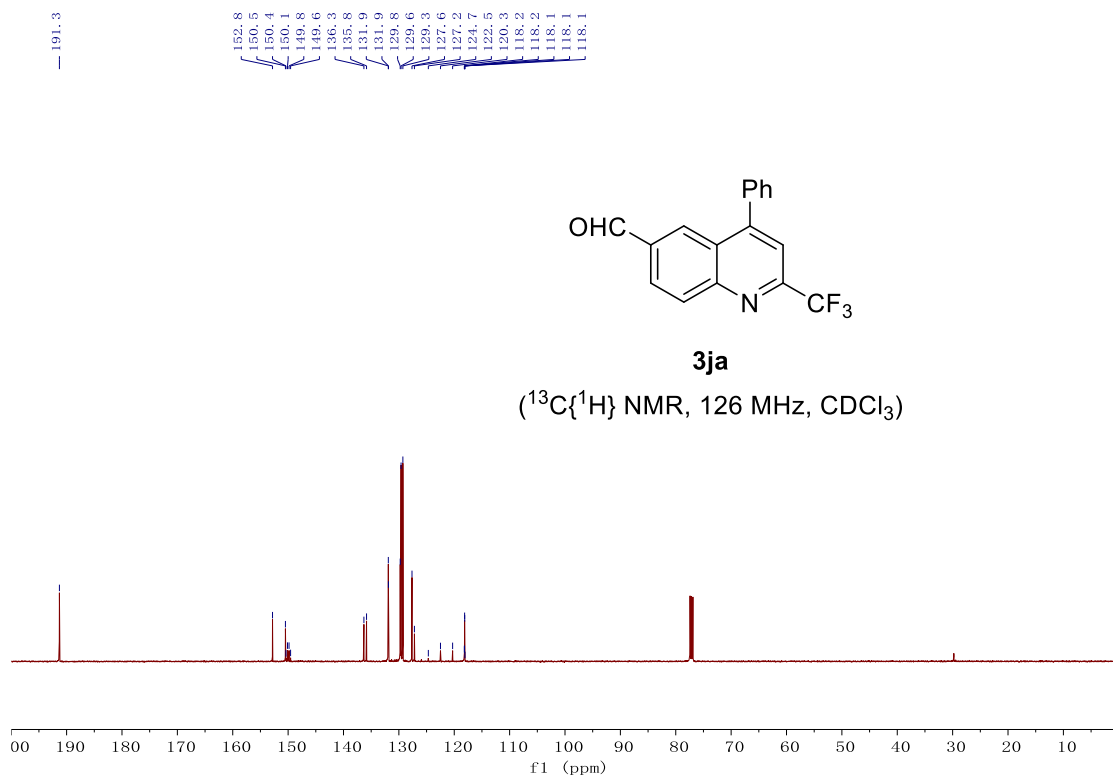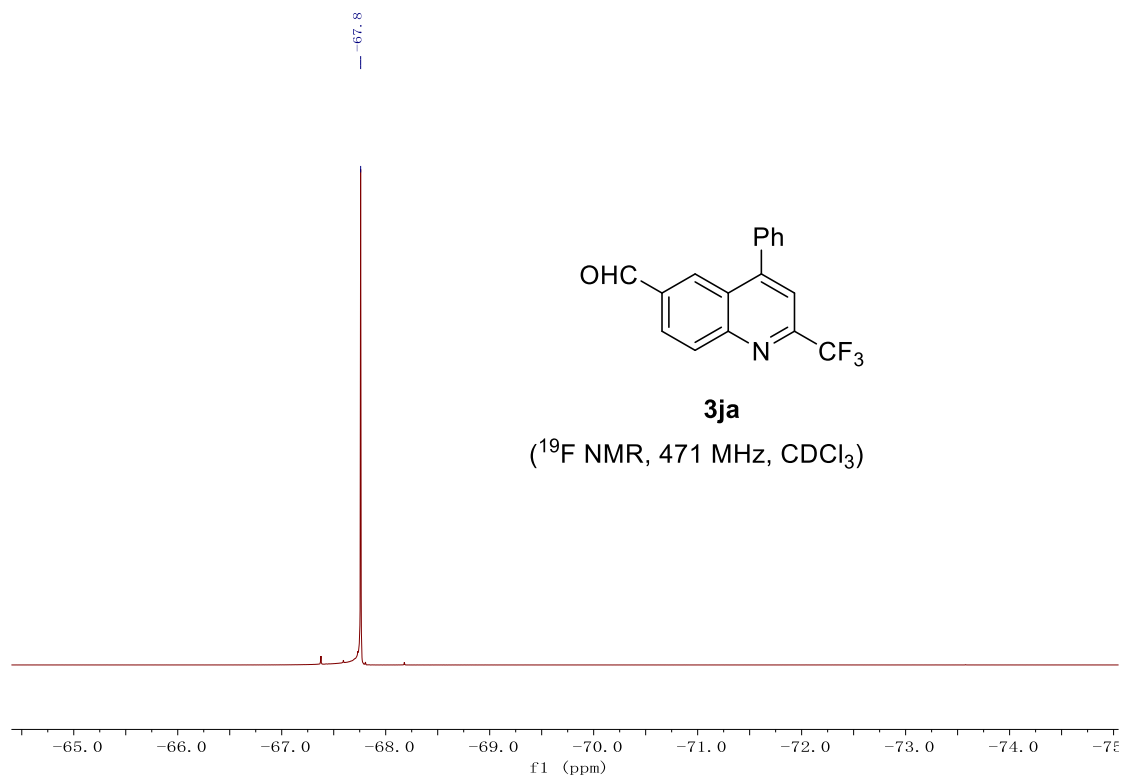



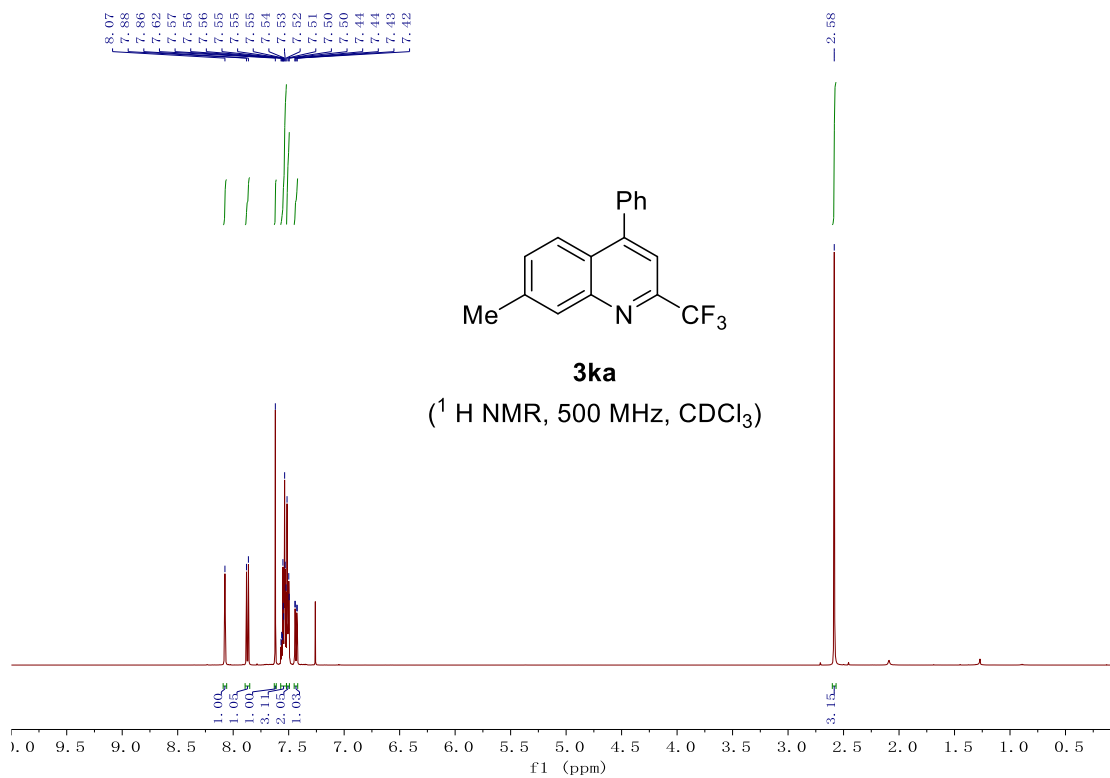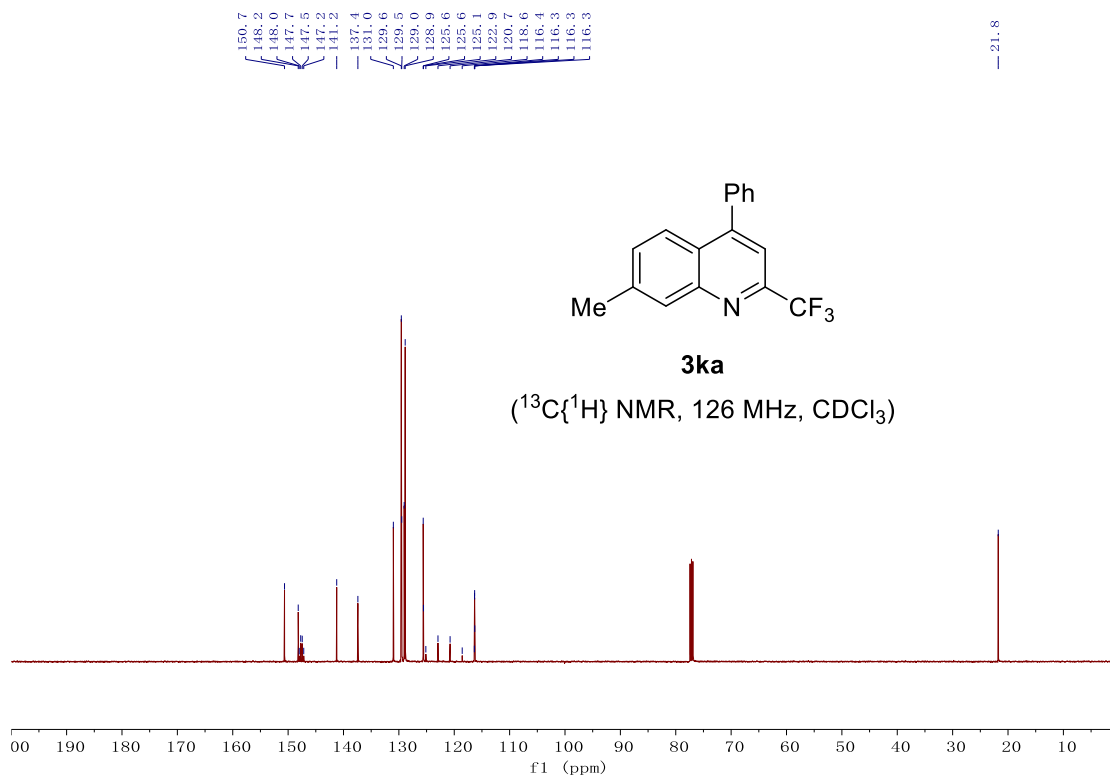

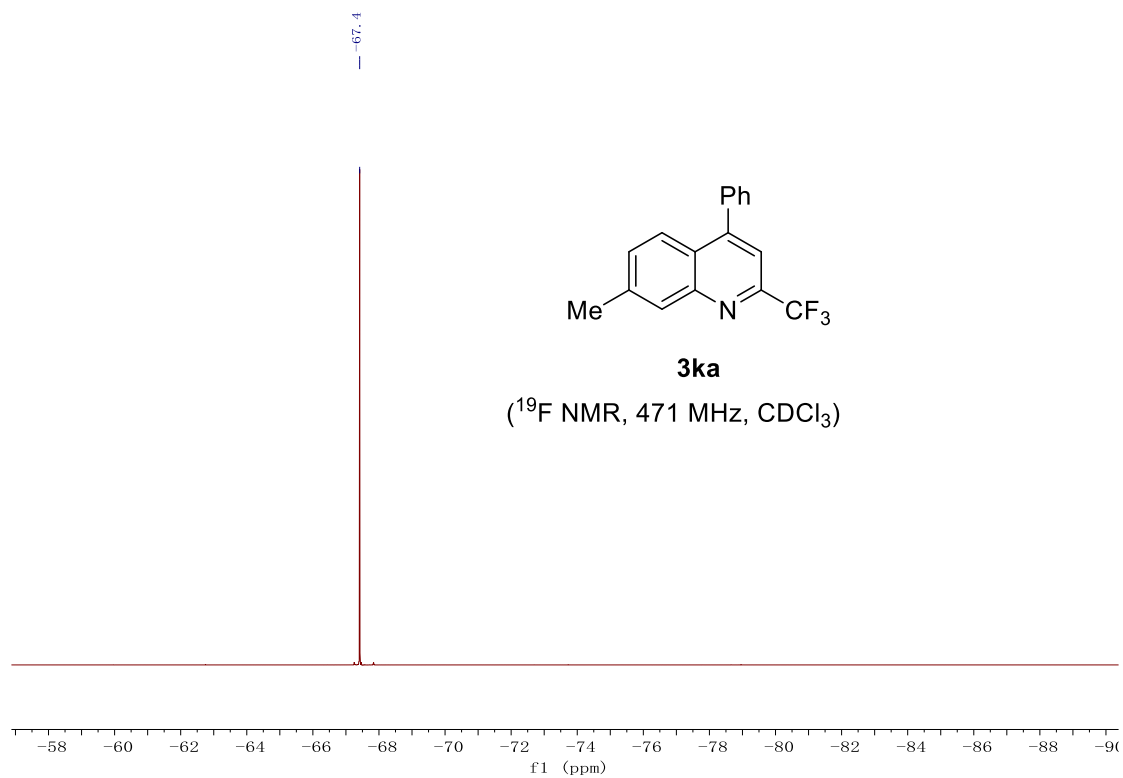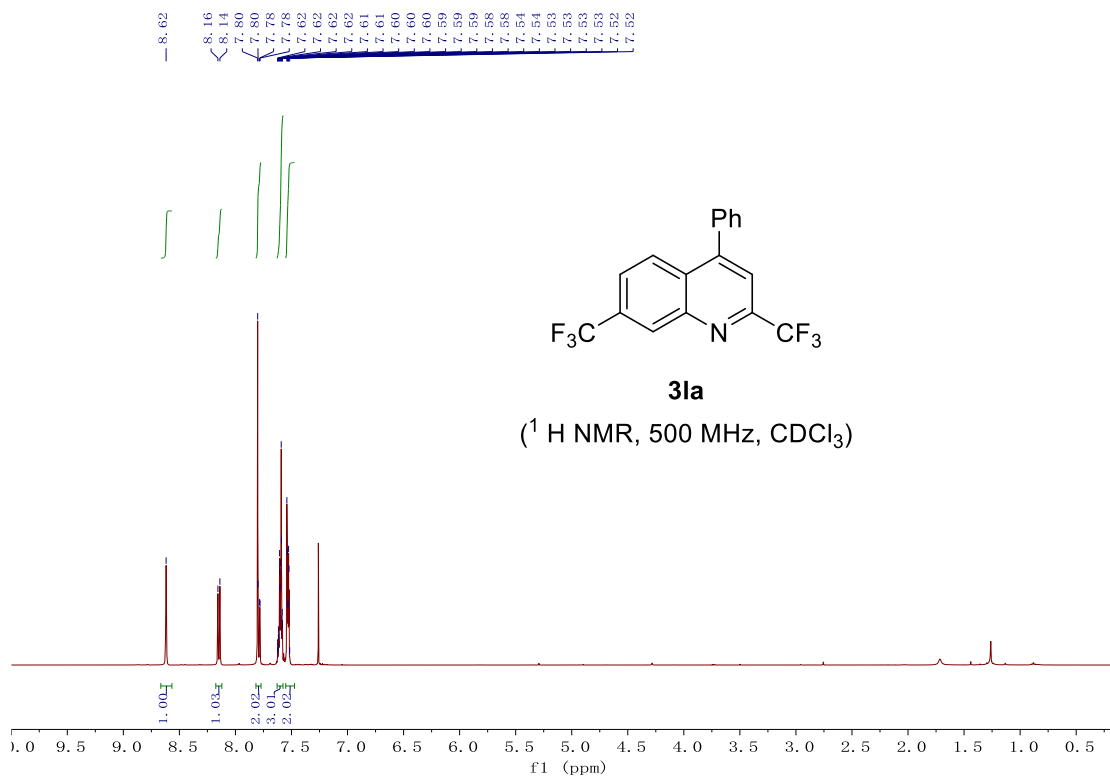

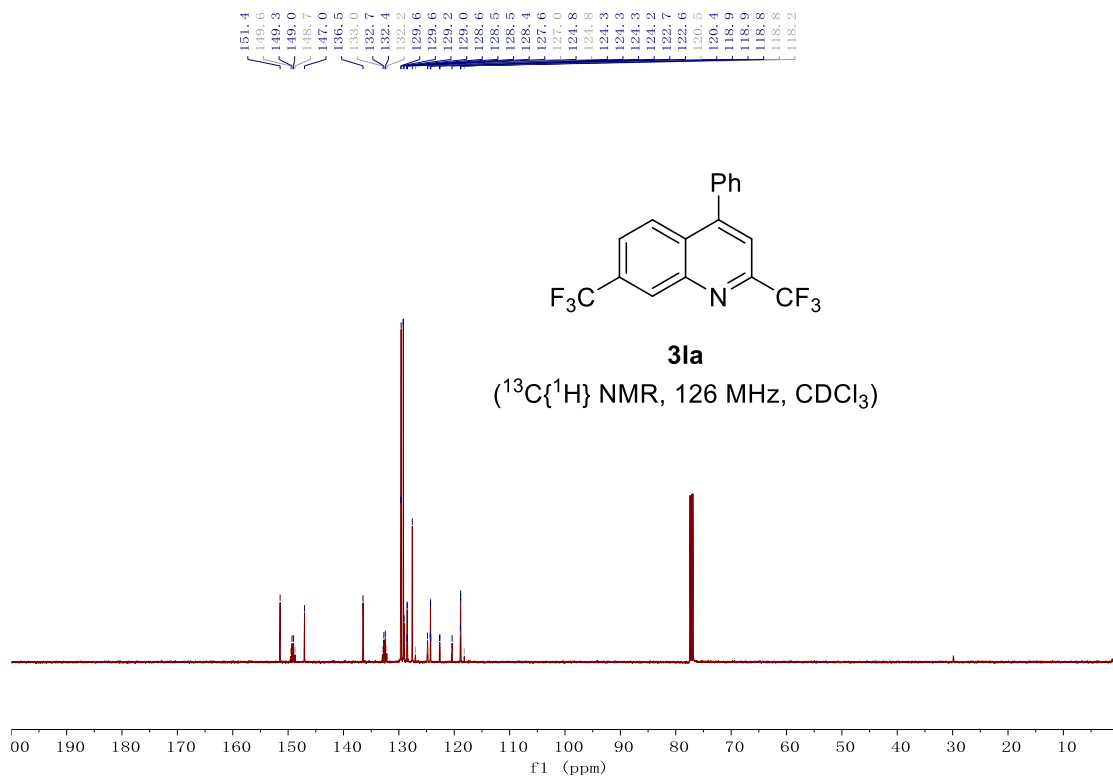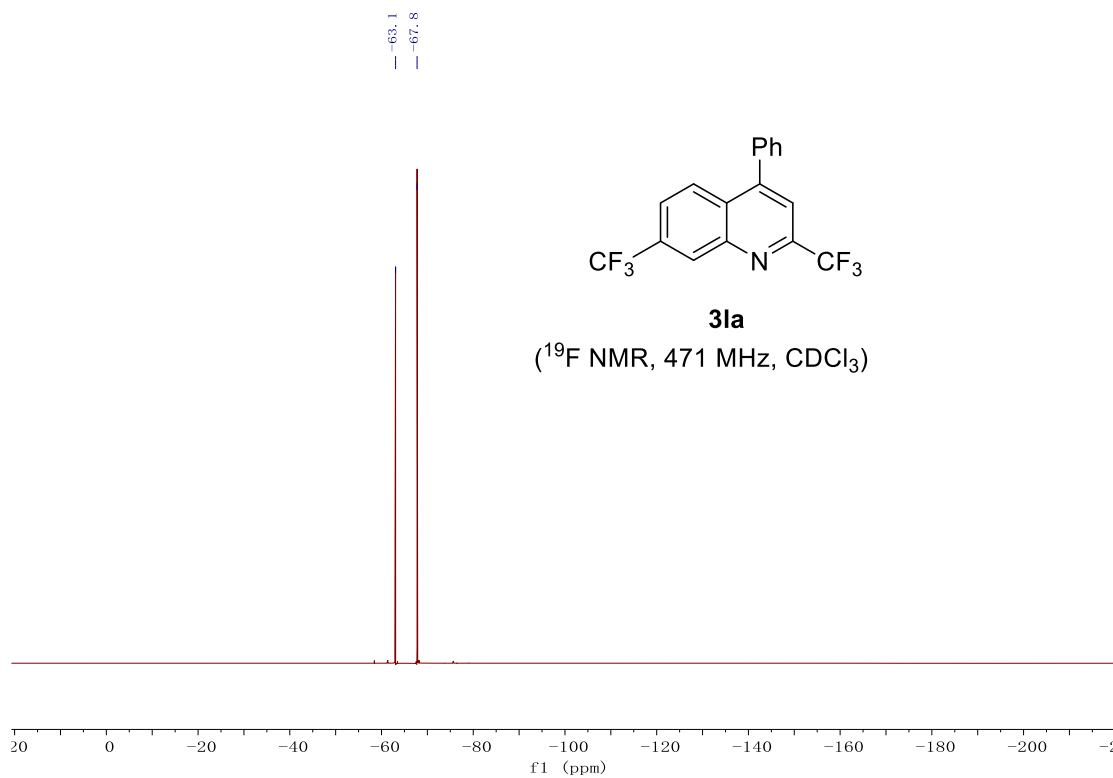

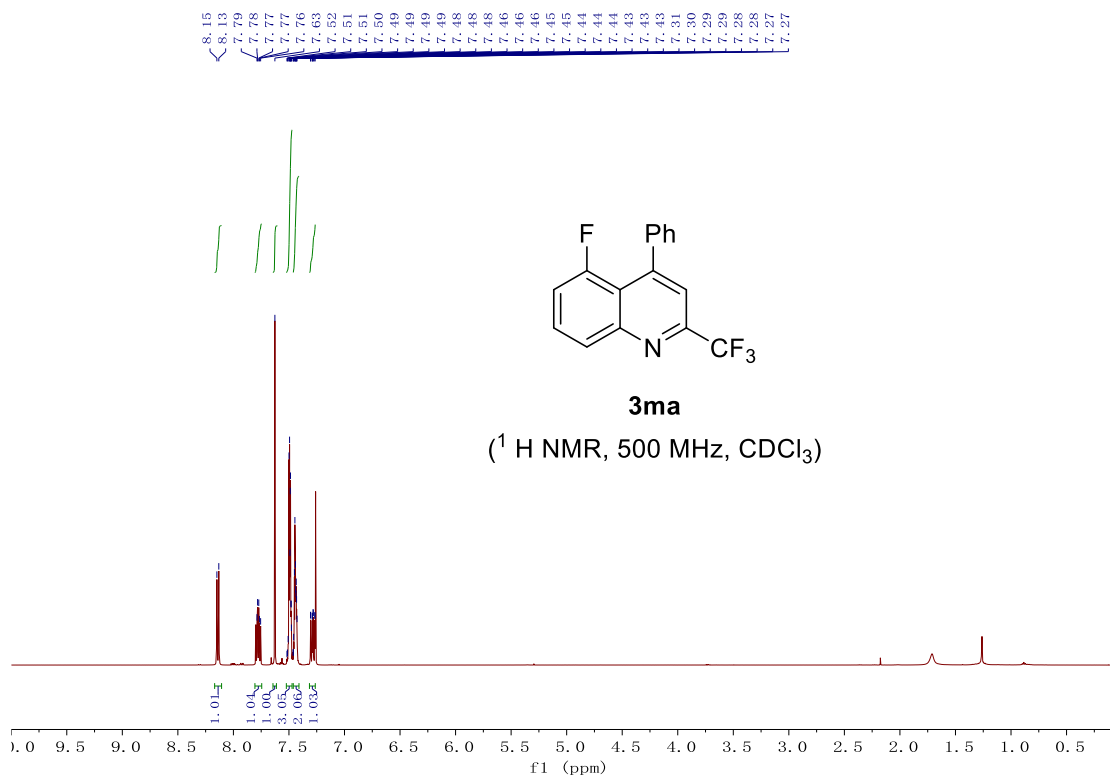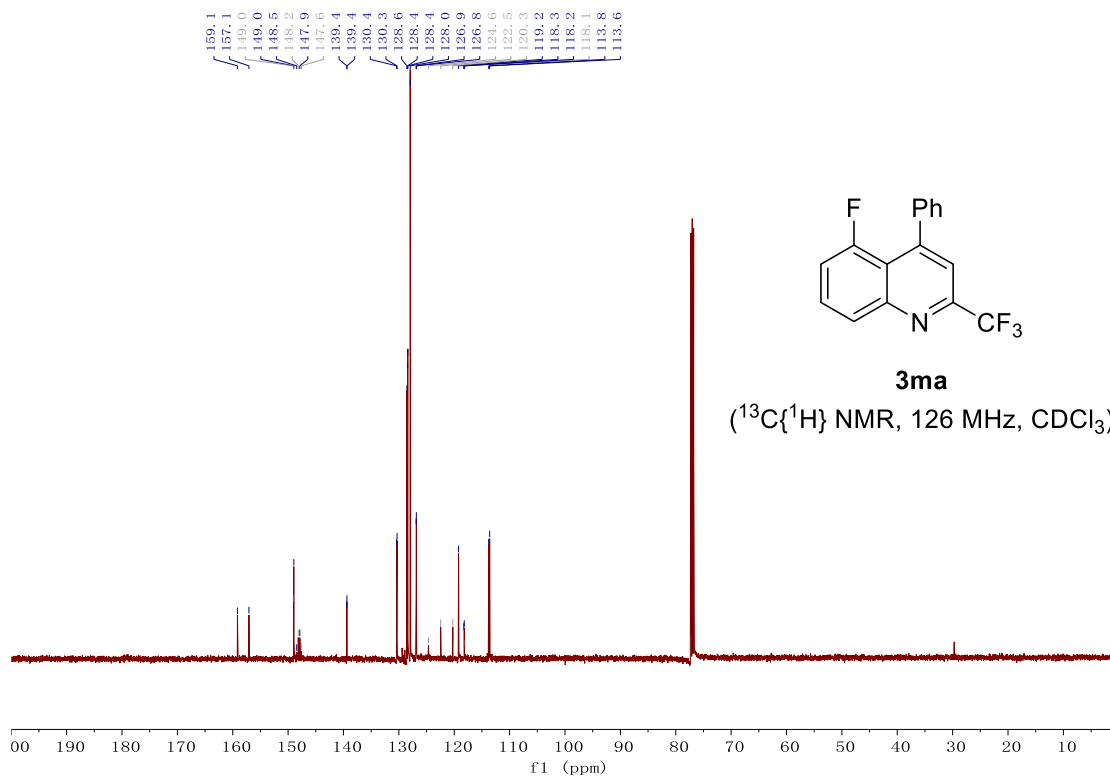



164.7  
162.7  
151.3  
149.2  
149.1  
149.0  
148.7  
148.4  
137.0  
129.6  
129.4  
129.1  
128.5  
128.4  
124.9  
124.7  
122.7  
120.5  
119.4  
119.2  
118.3  
116.6  
116.6  
116.6  
114.2  
114.0

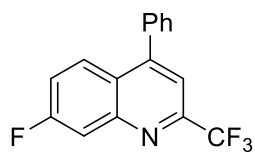

**3m'a**

(<sup>13</sup>C{<sup>1</sup>H} NMR, 126 MHz, CDCl<sub>3</sub>)

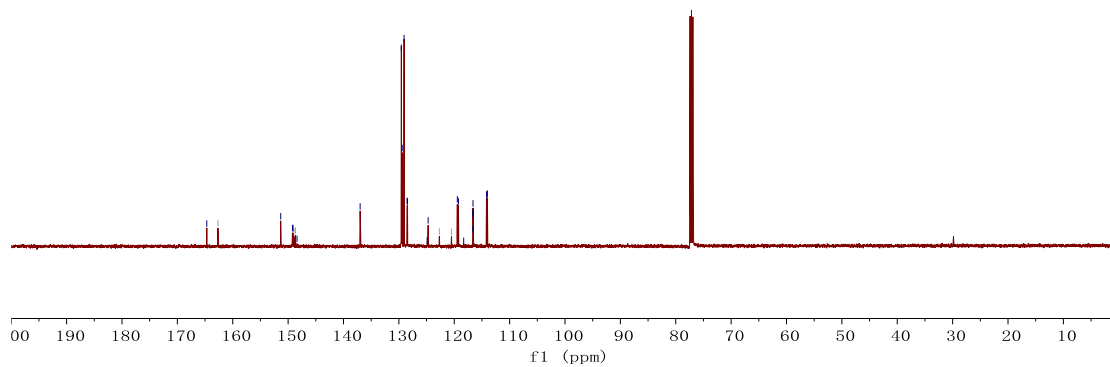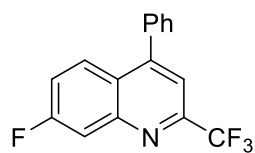

**3m'a**

(<sup>19</sup>F NMR, 471 MHz, CDCl<sub>3</sub>)

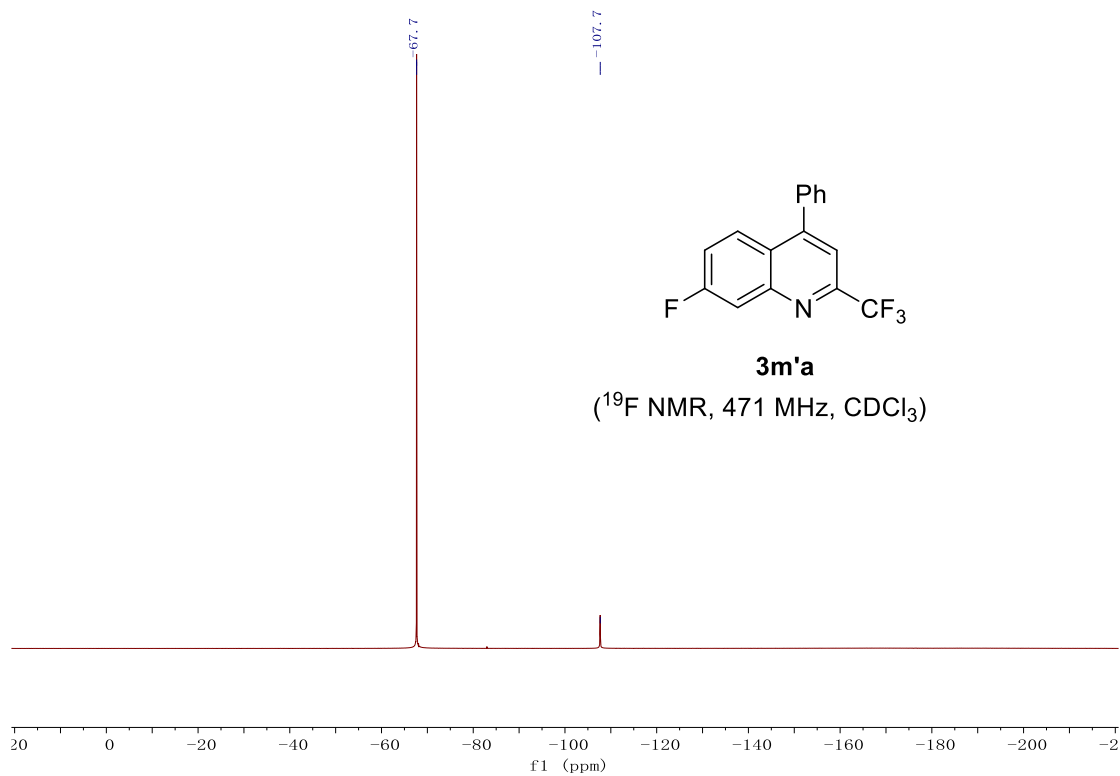

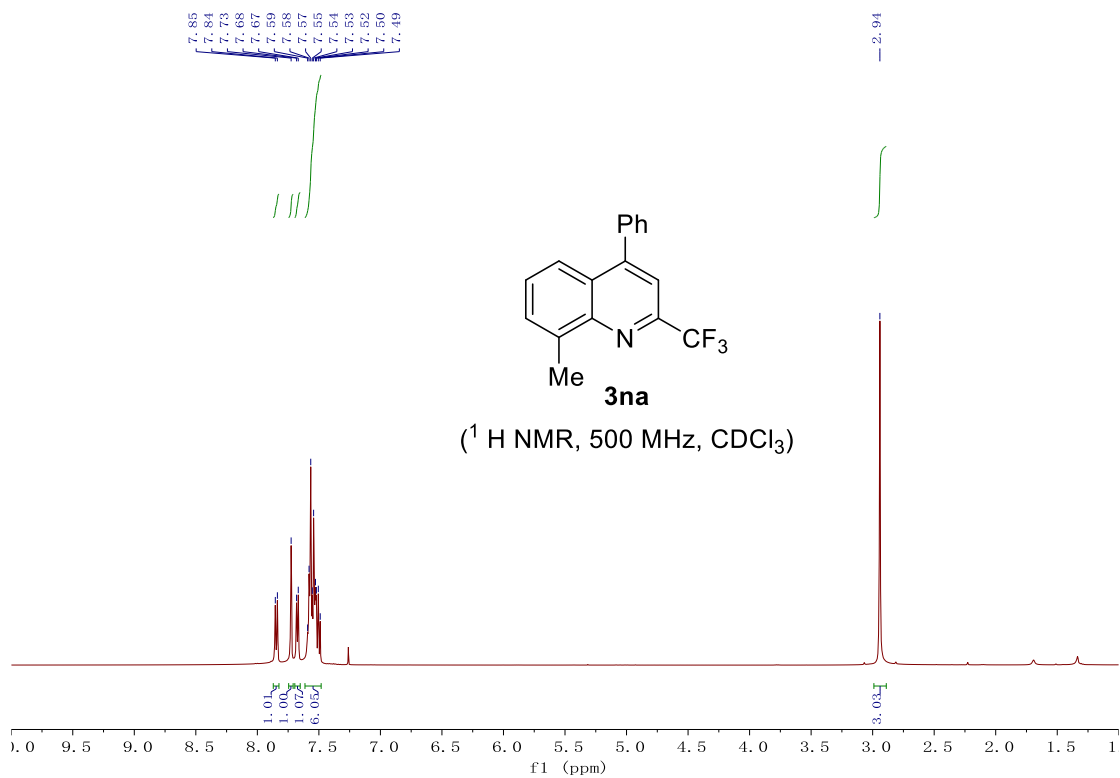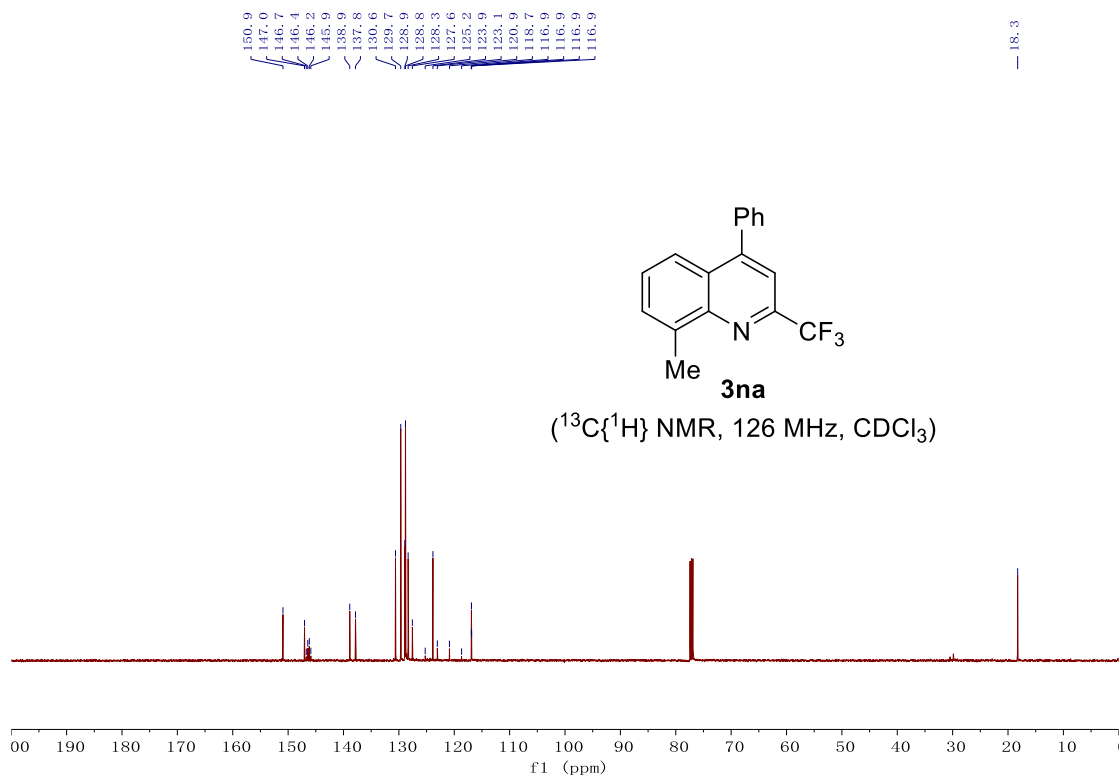

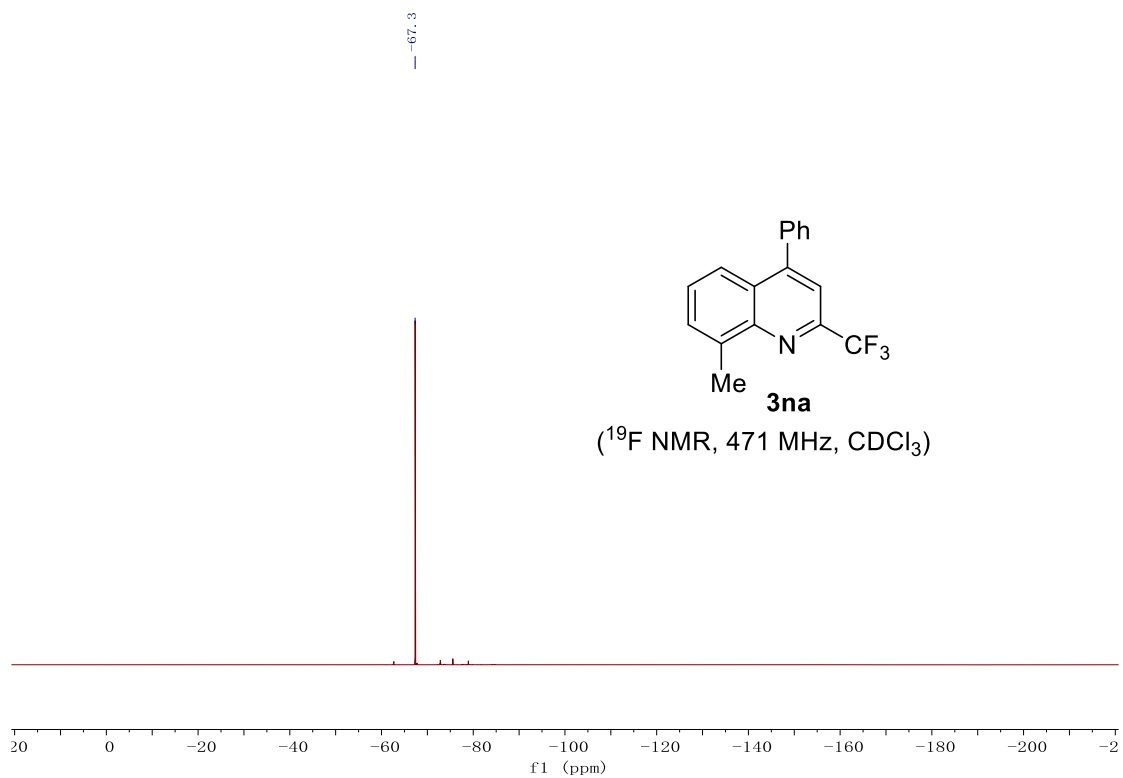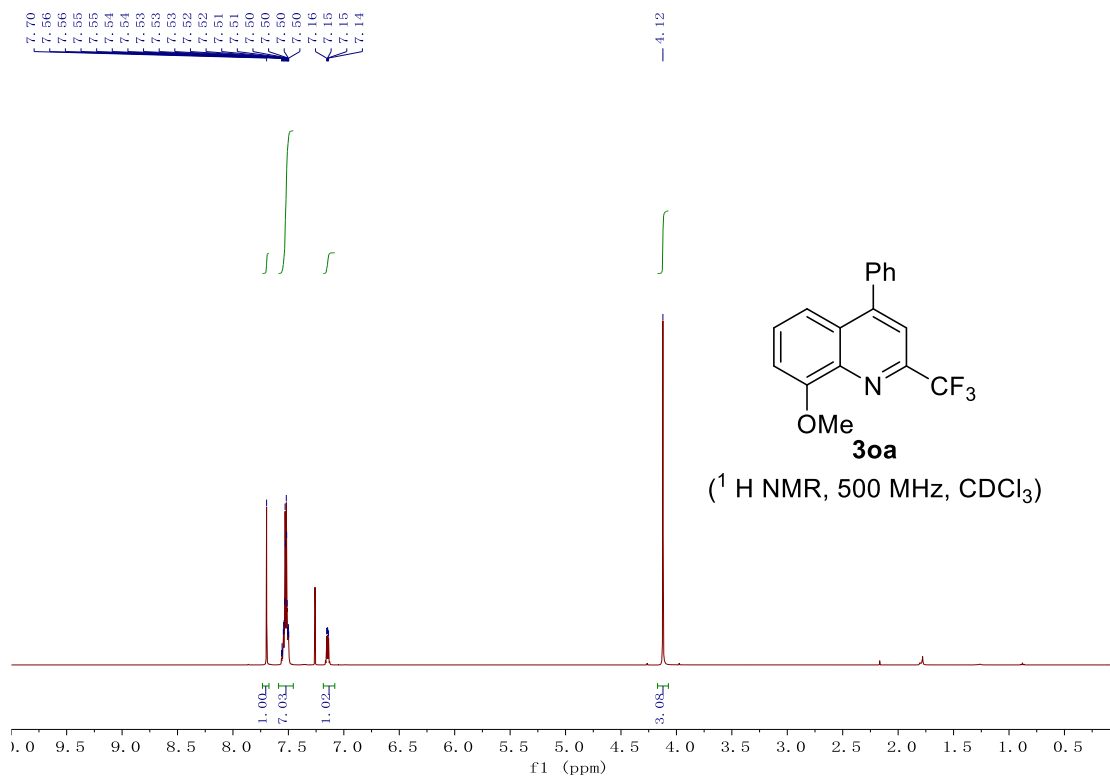



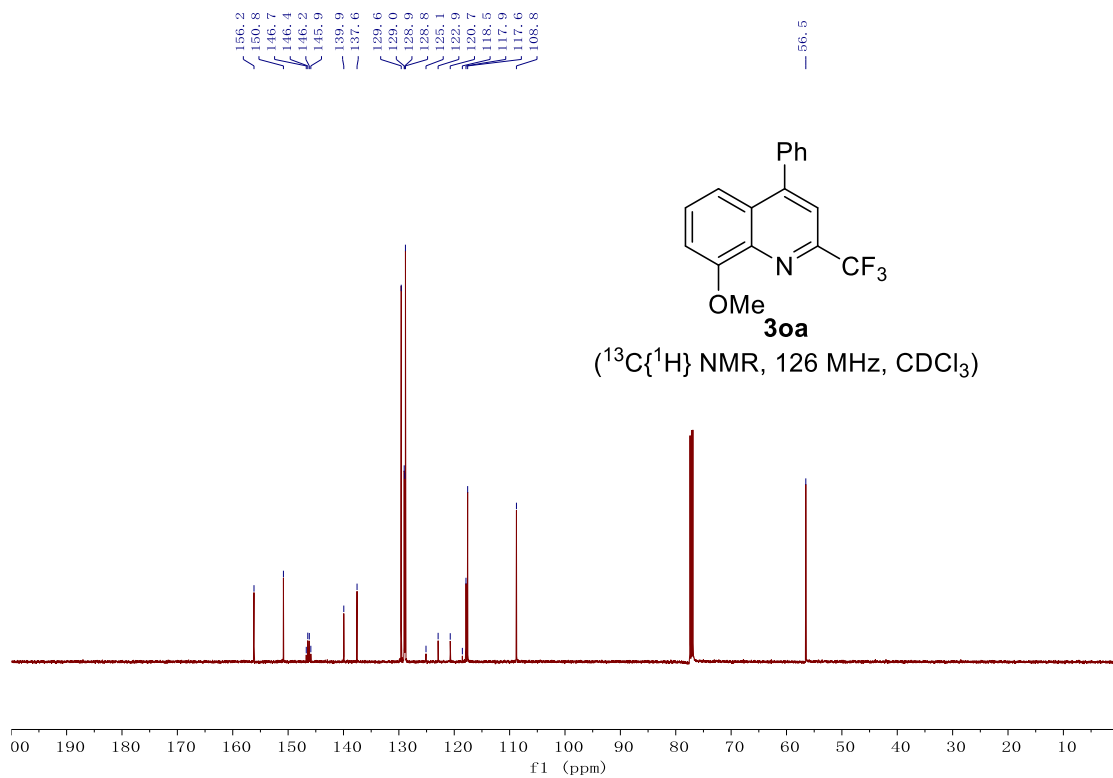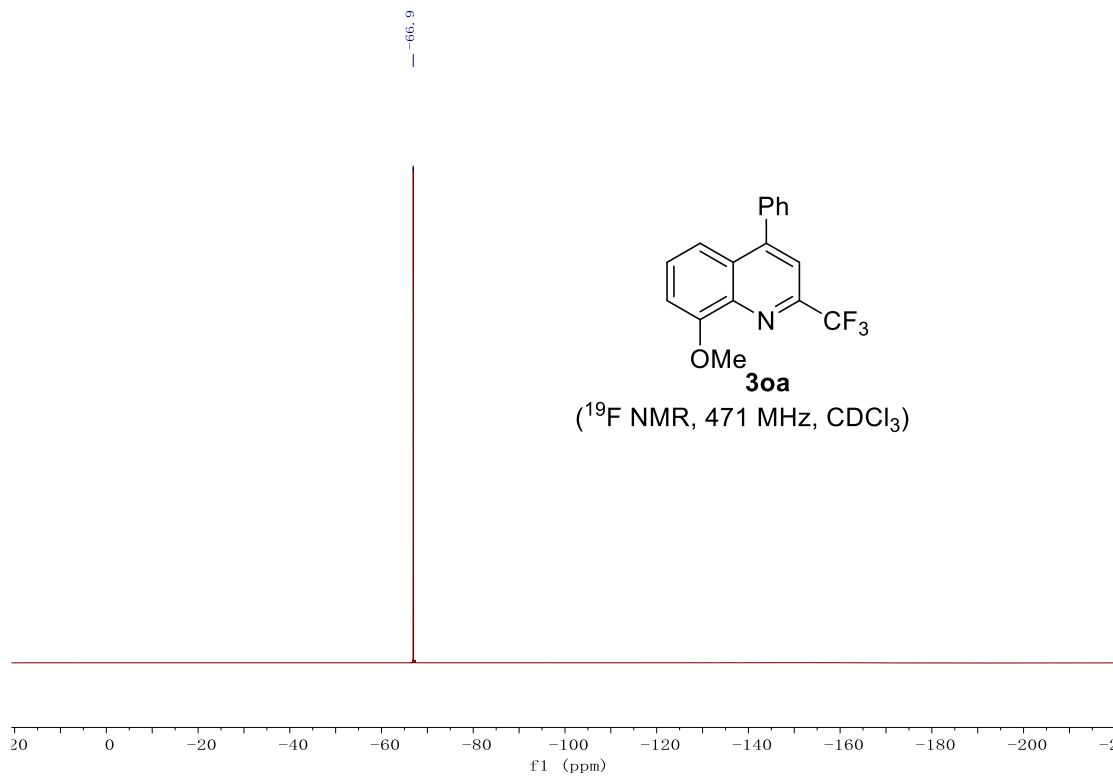

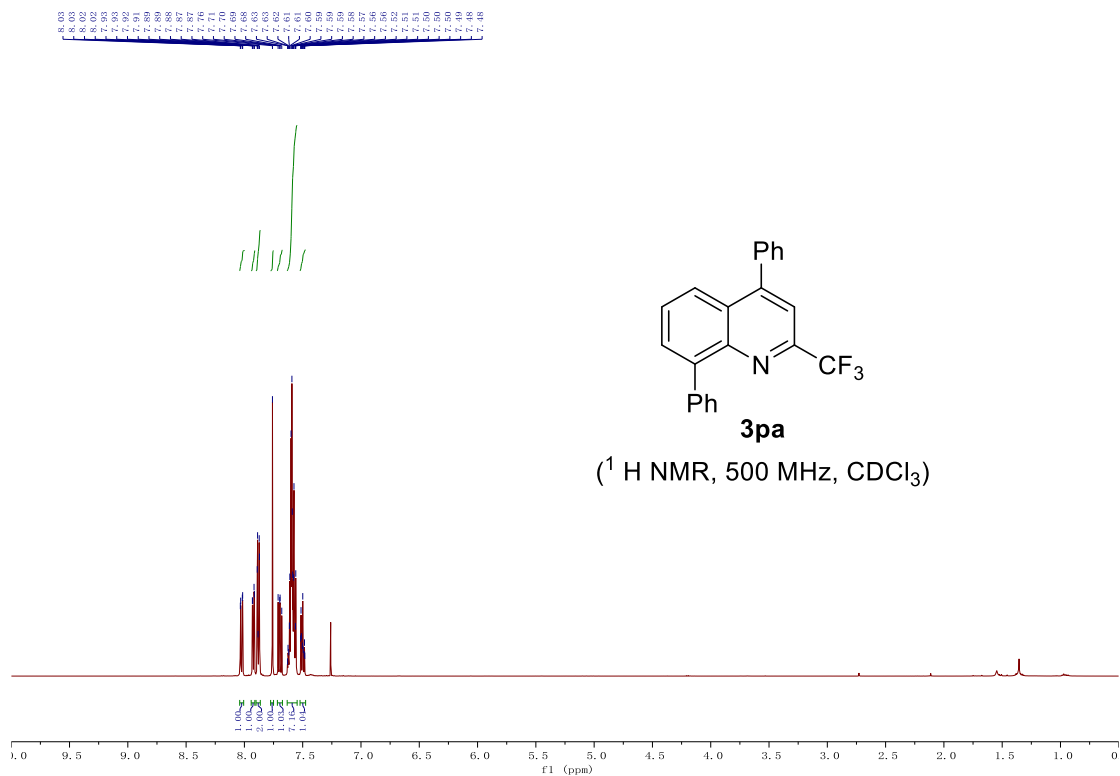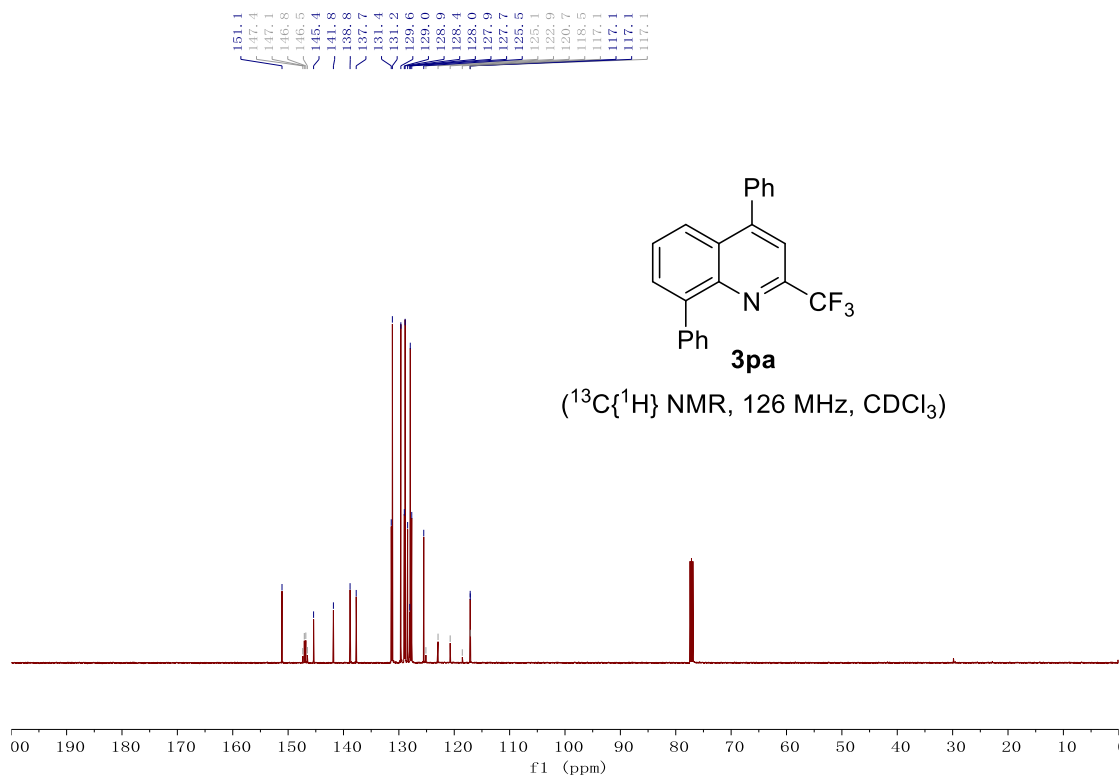

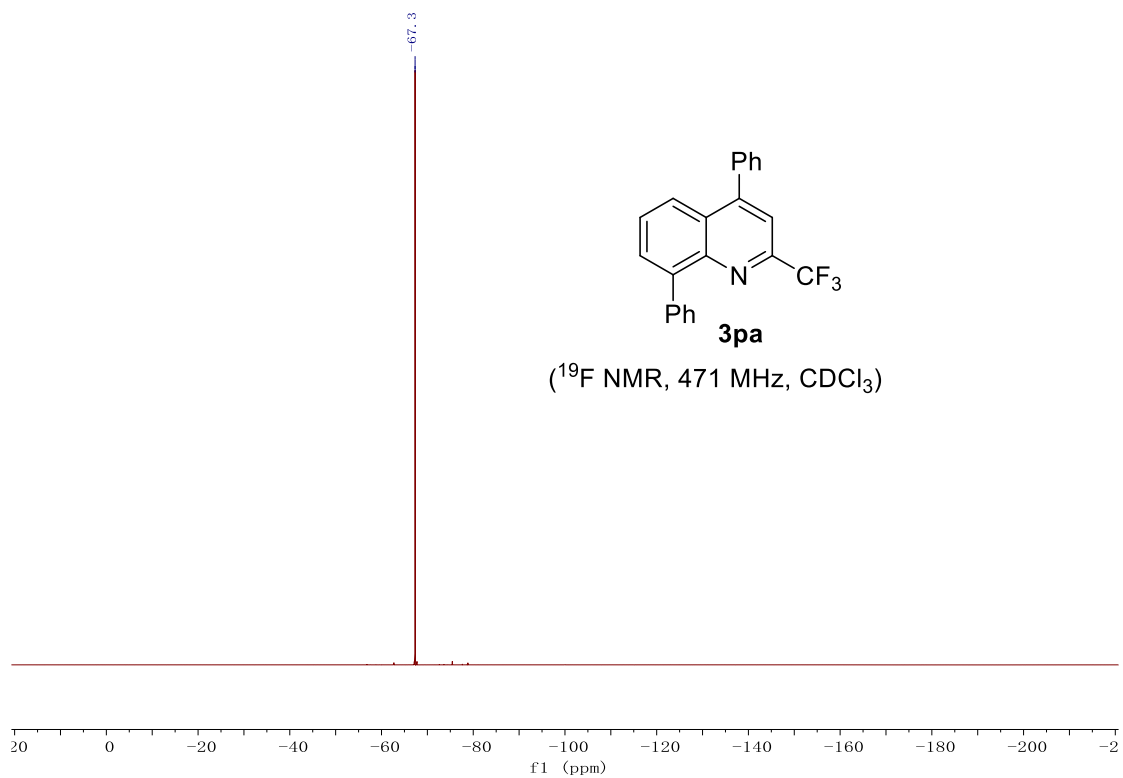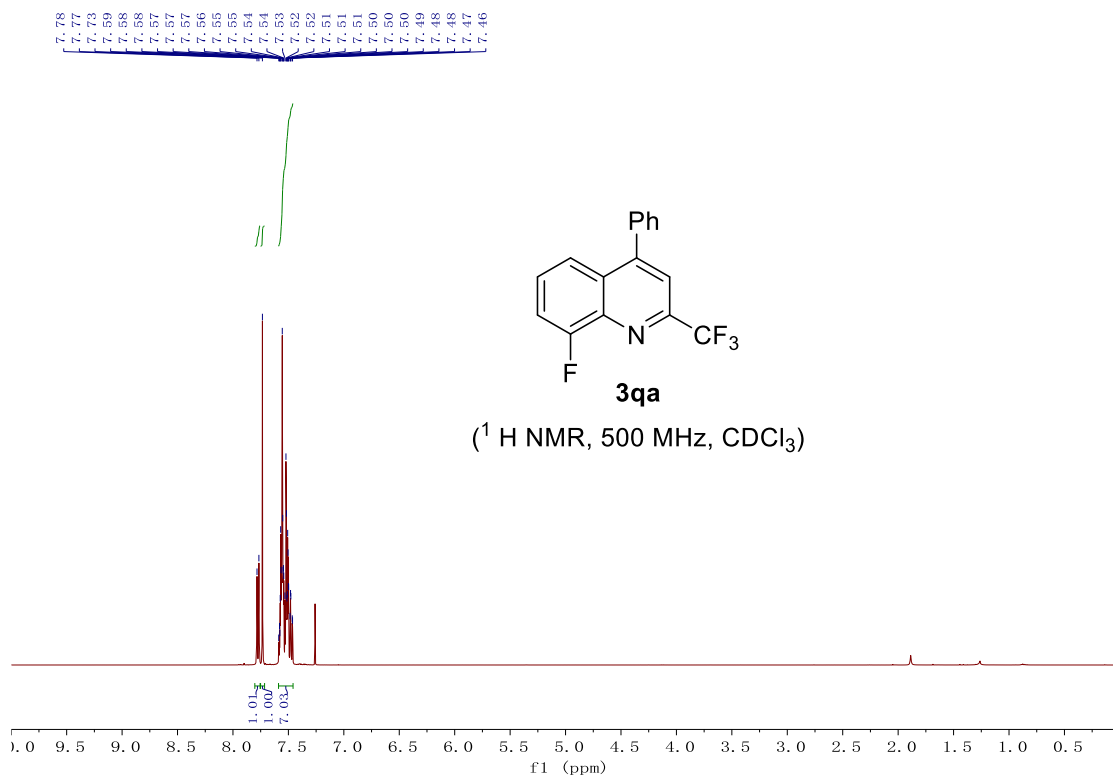

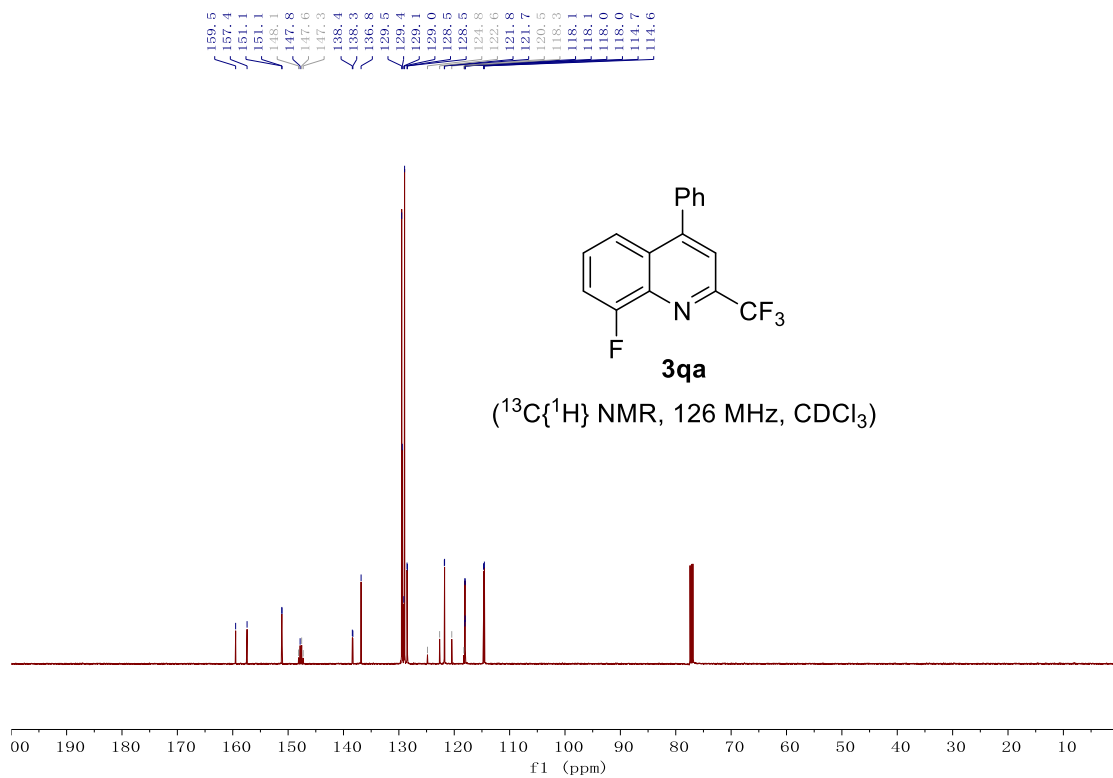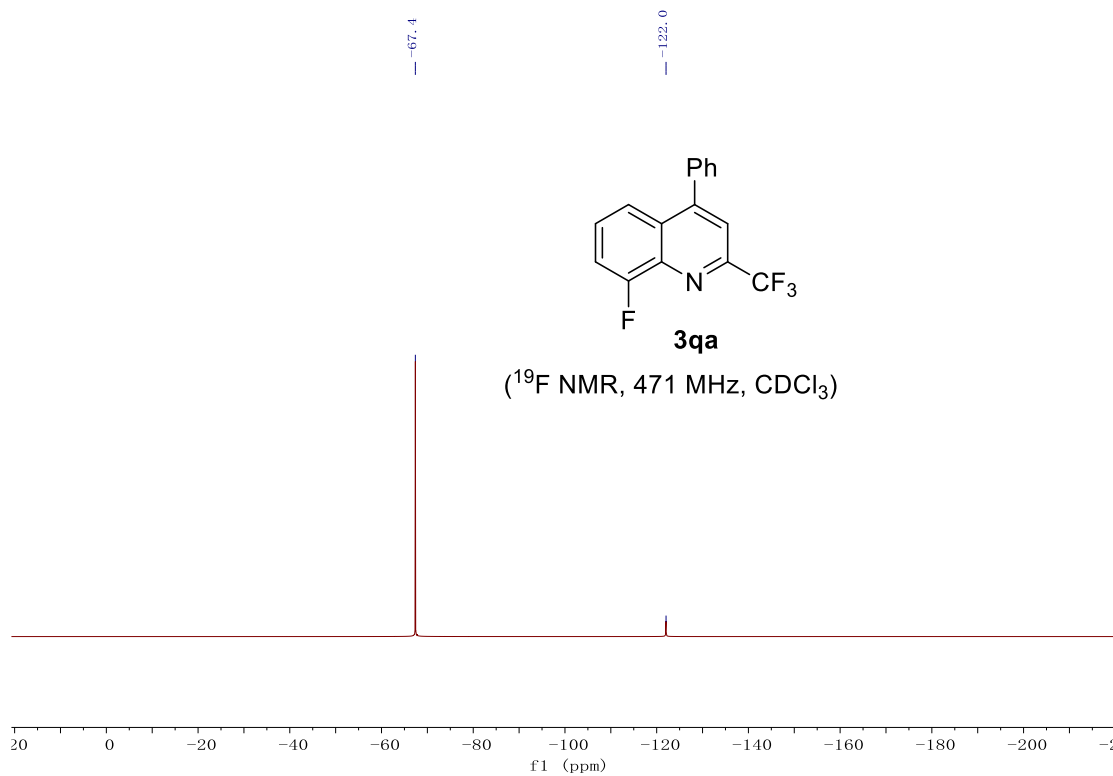

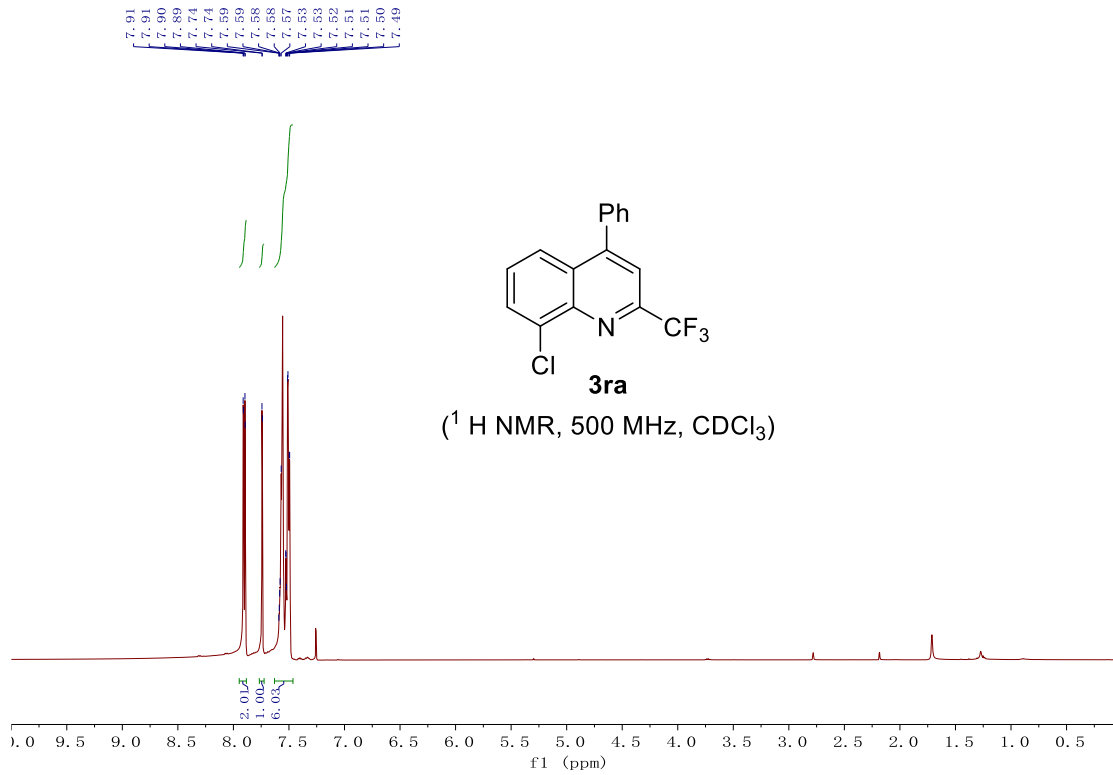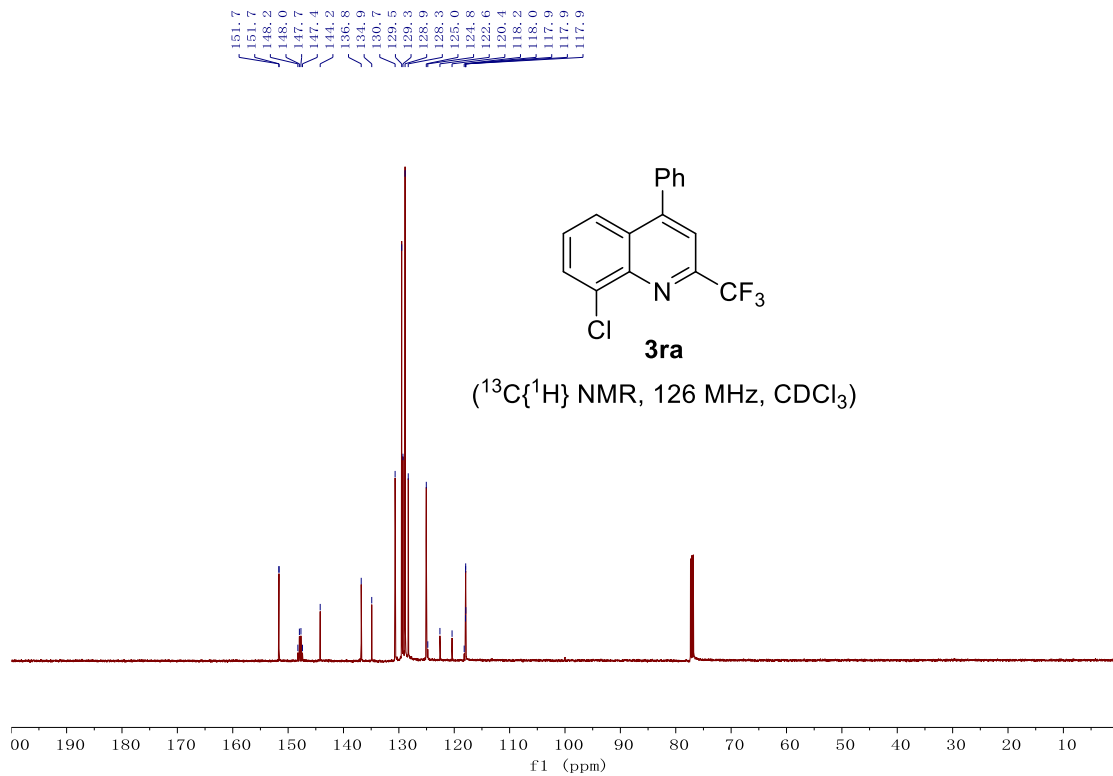

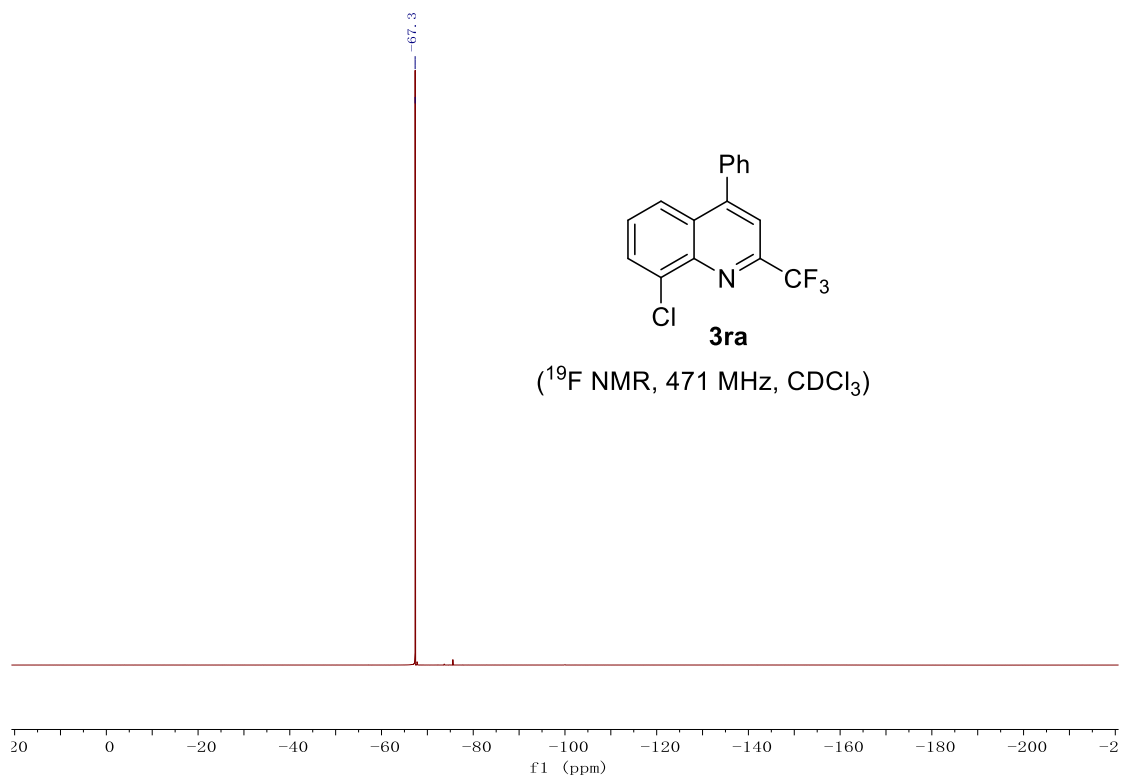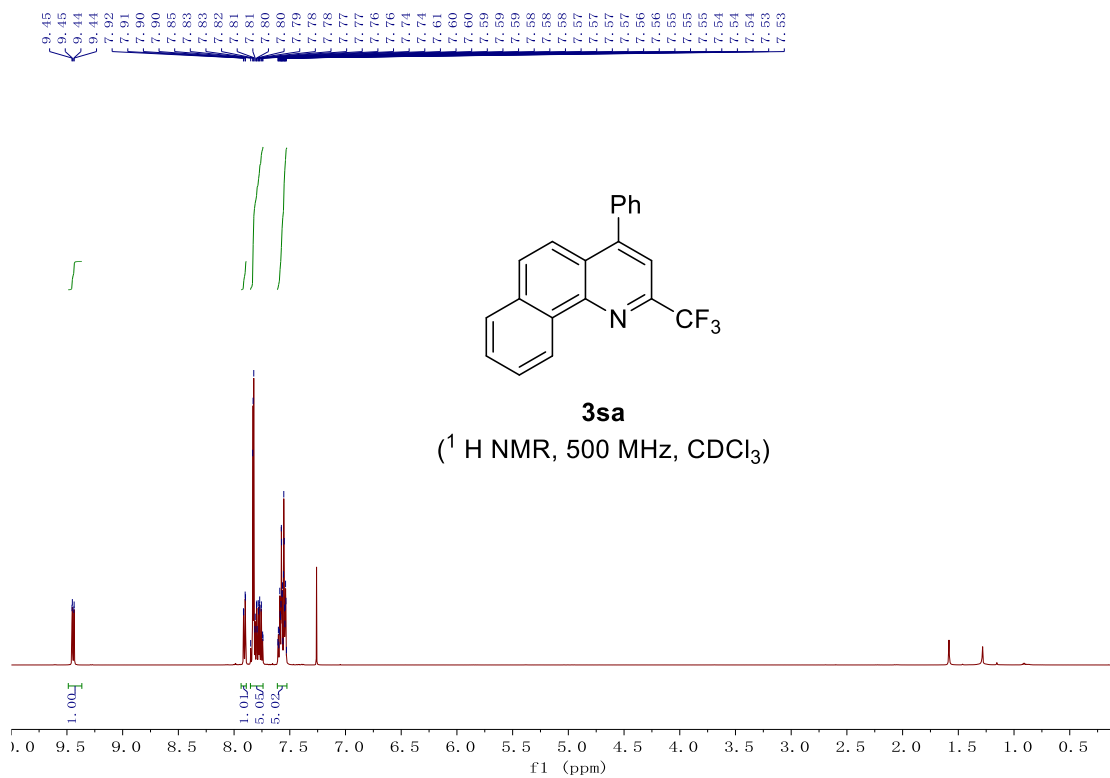

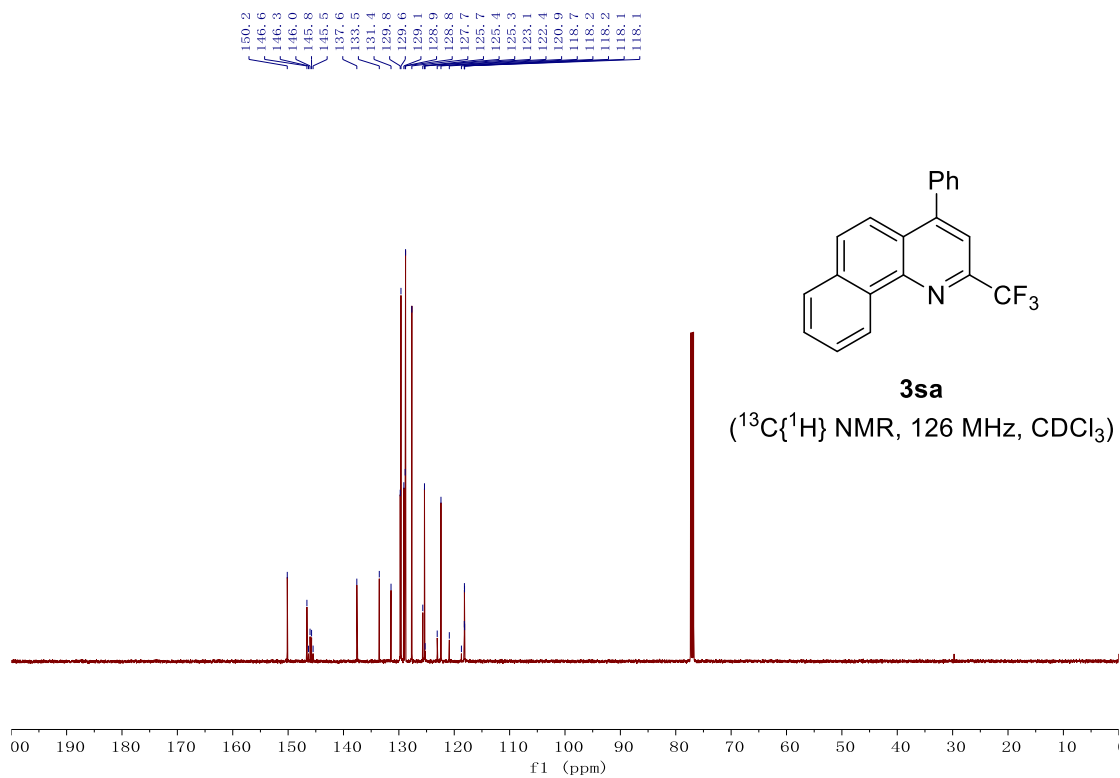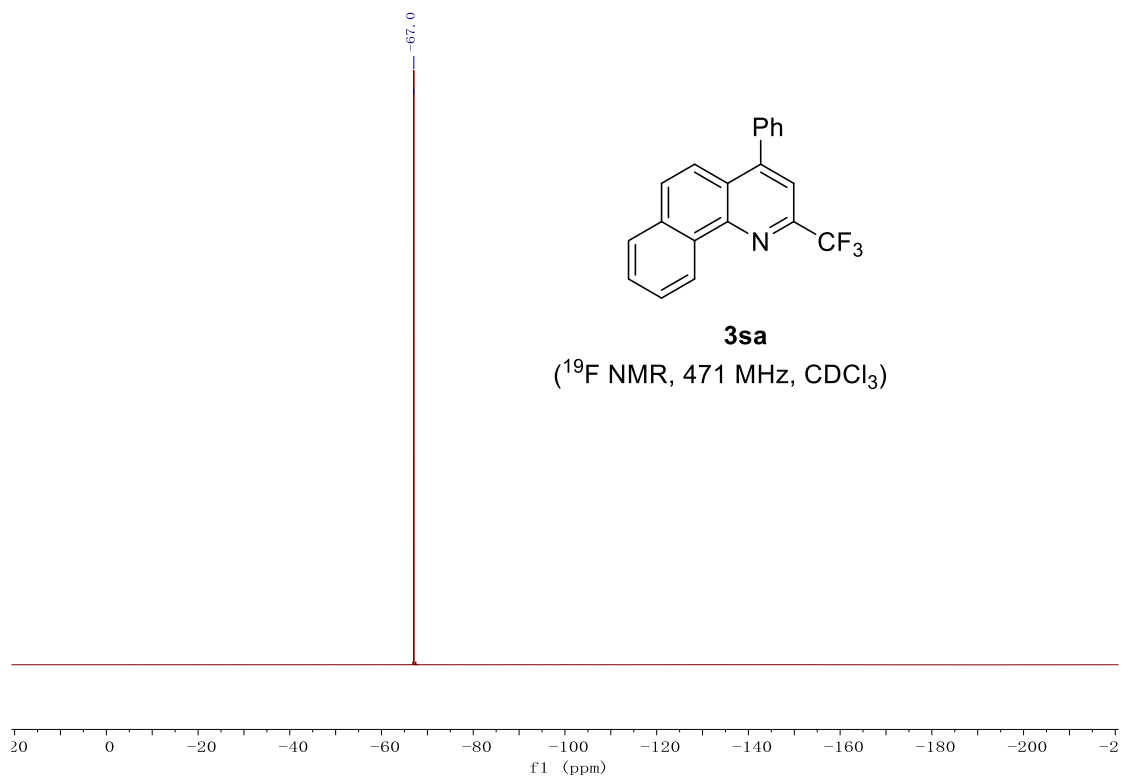

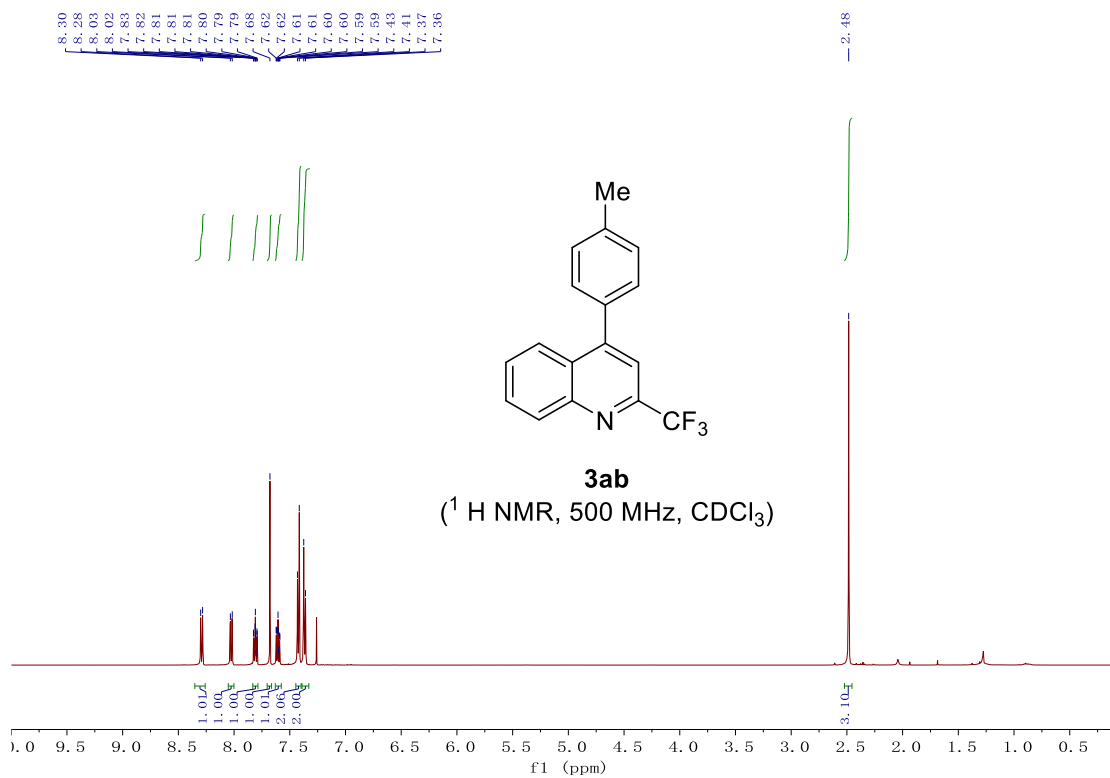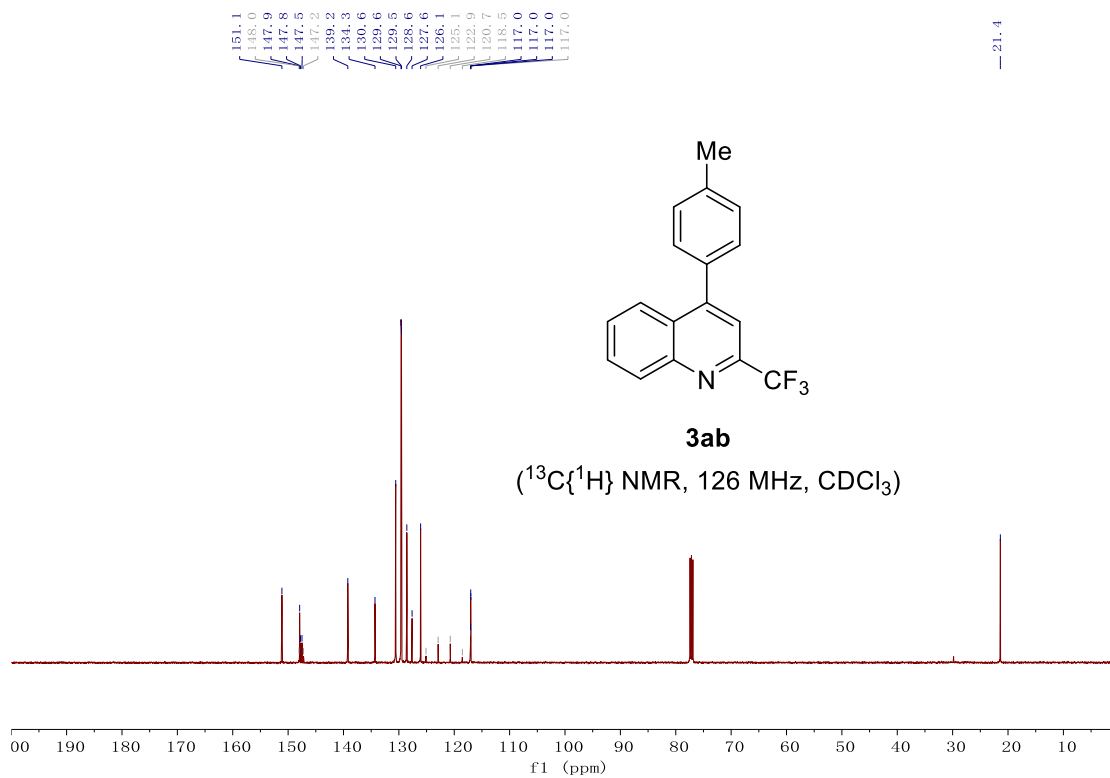



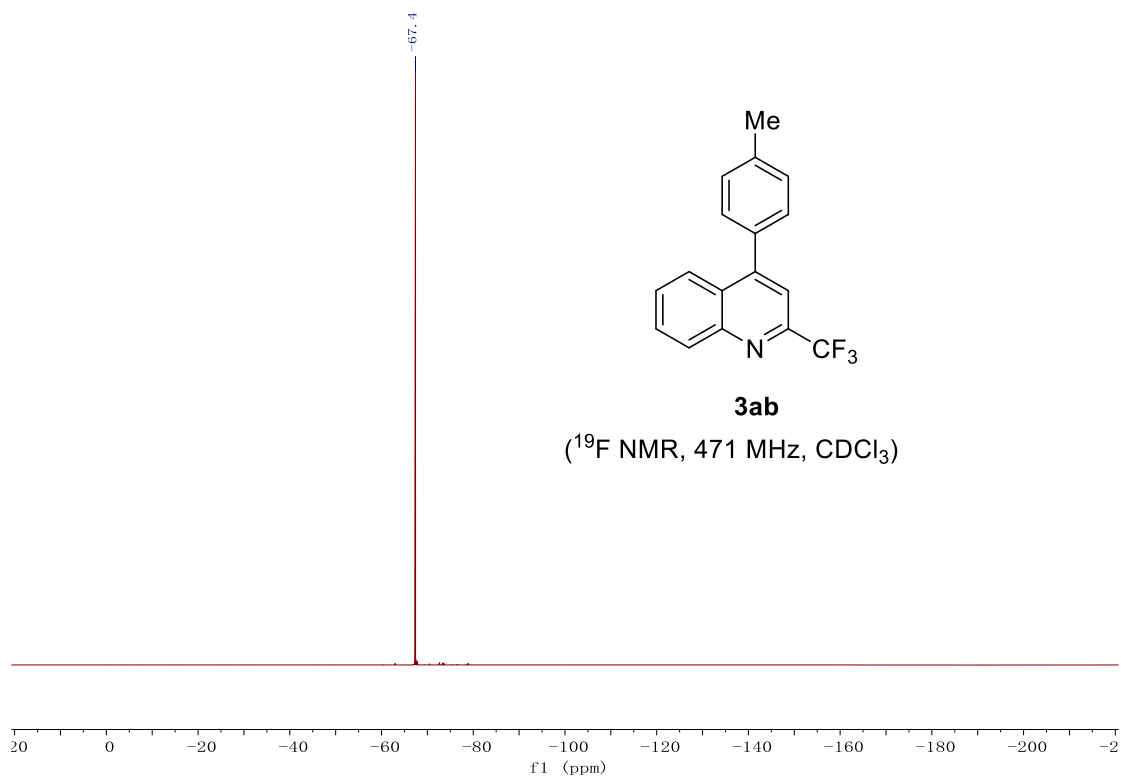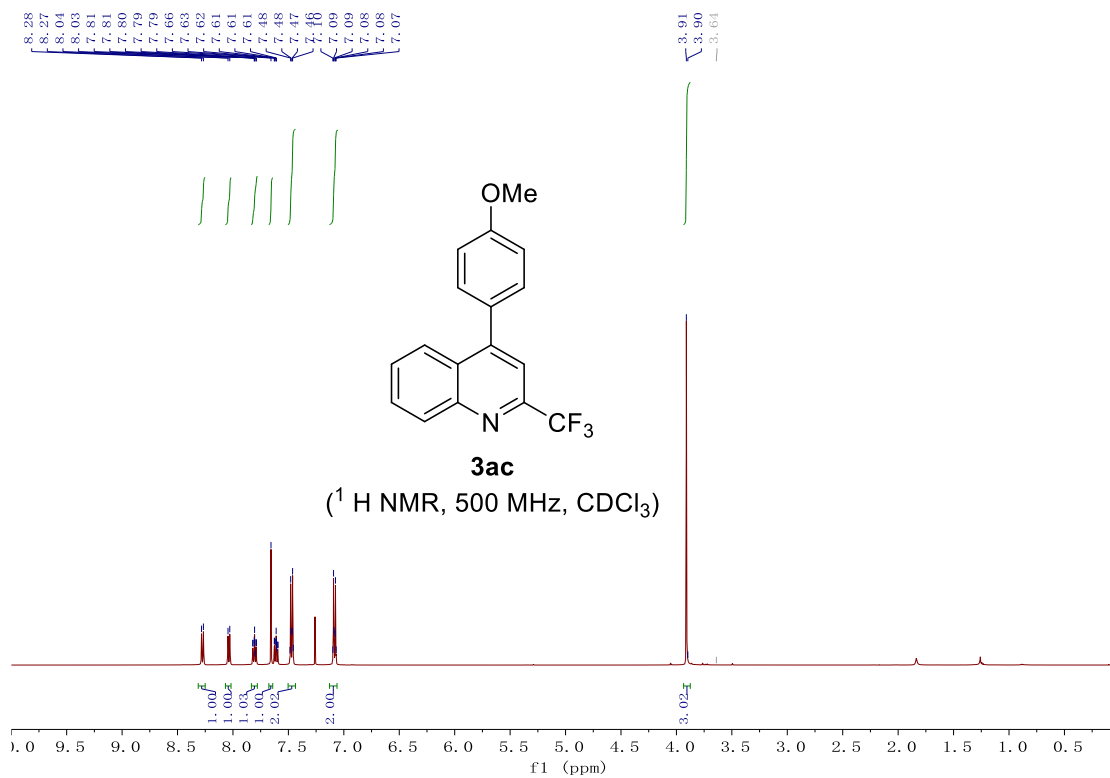

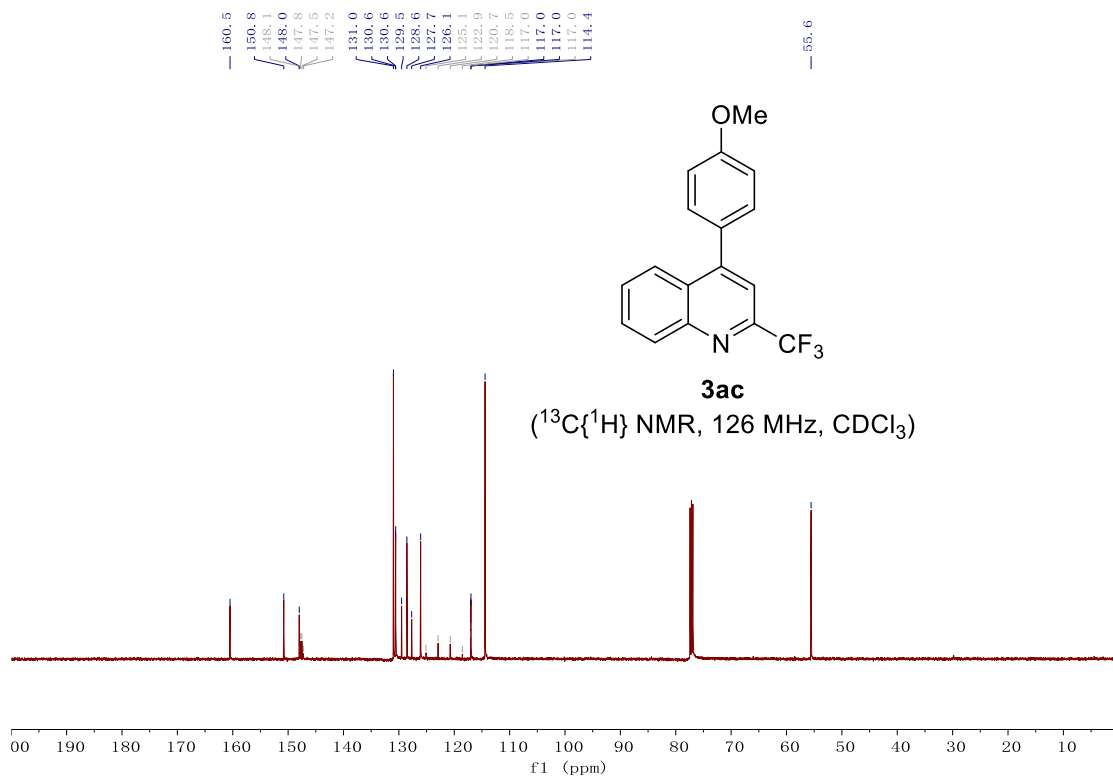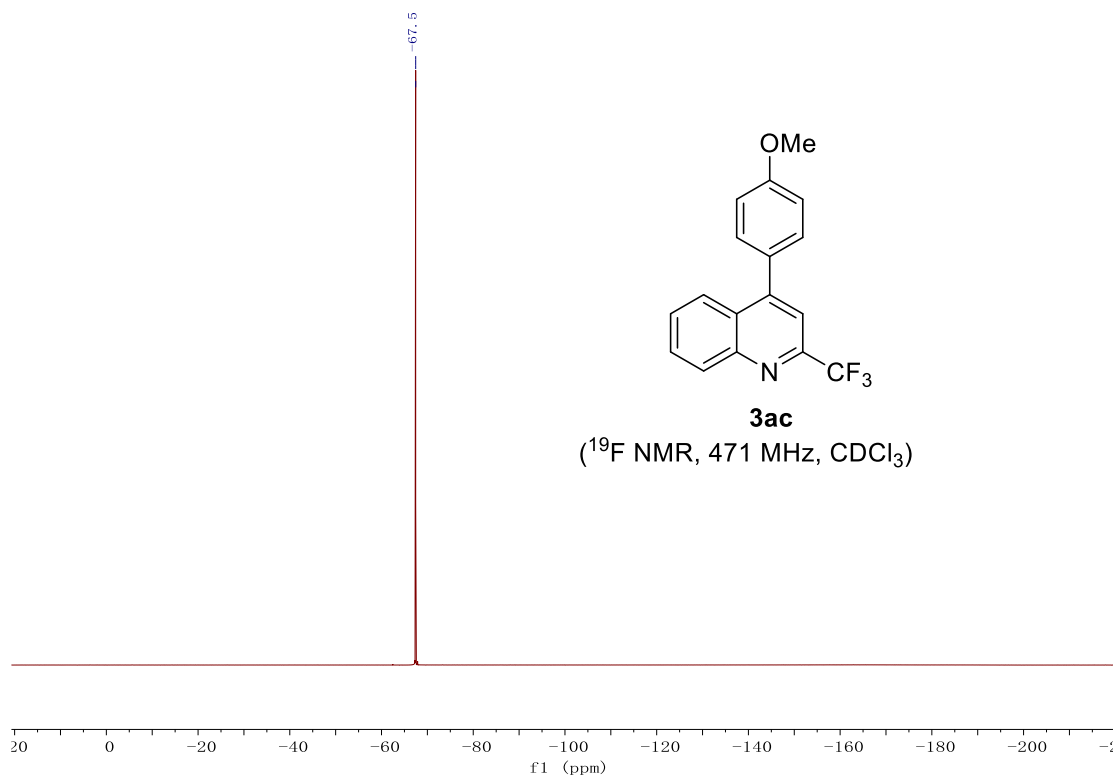

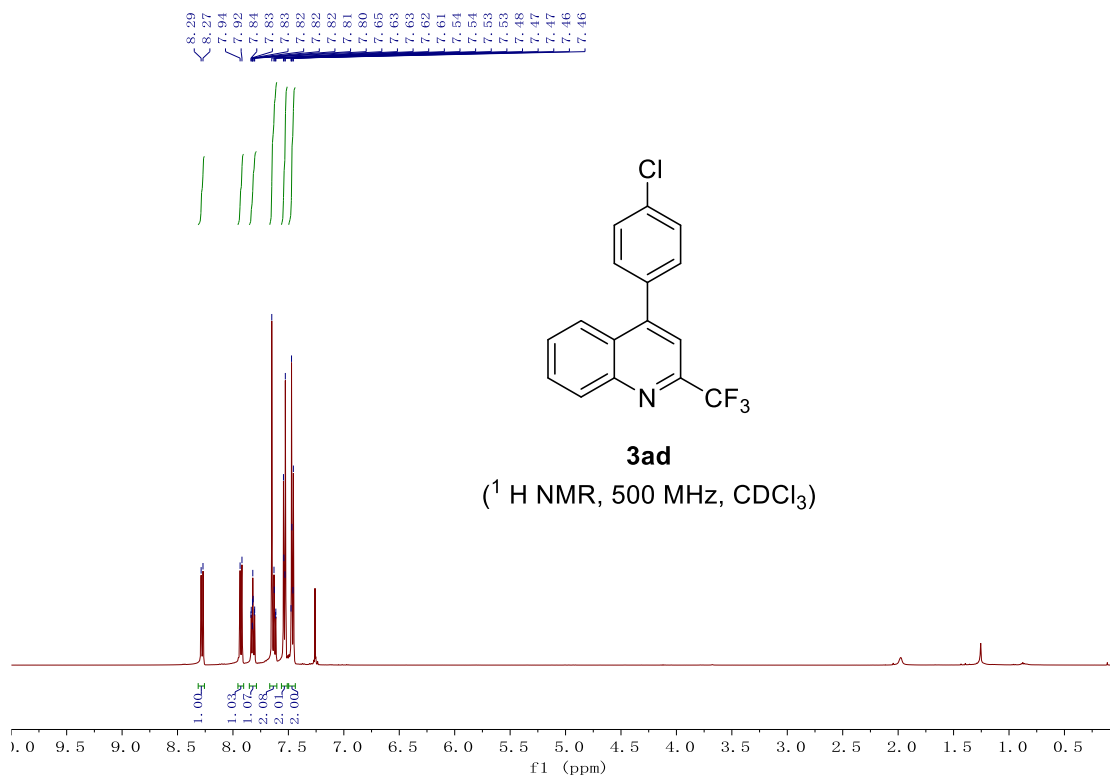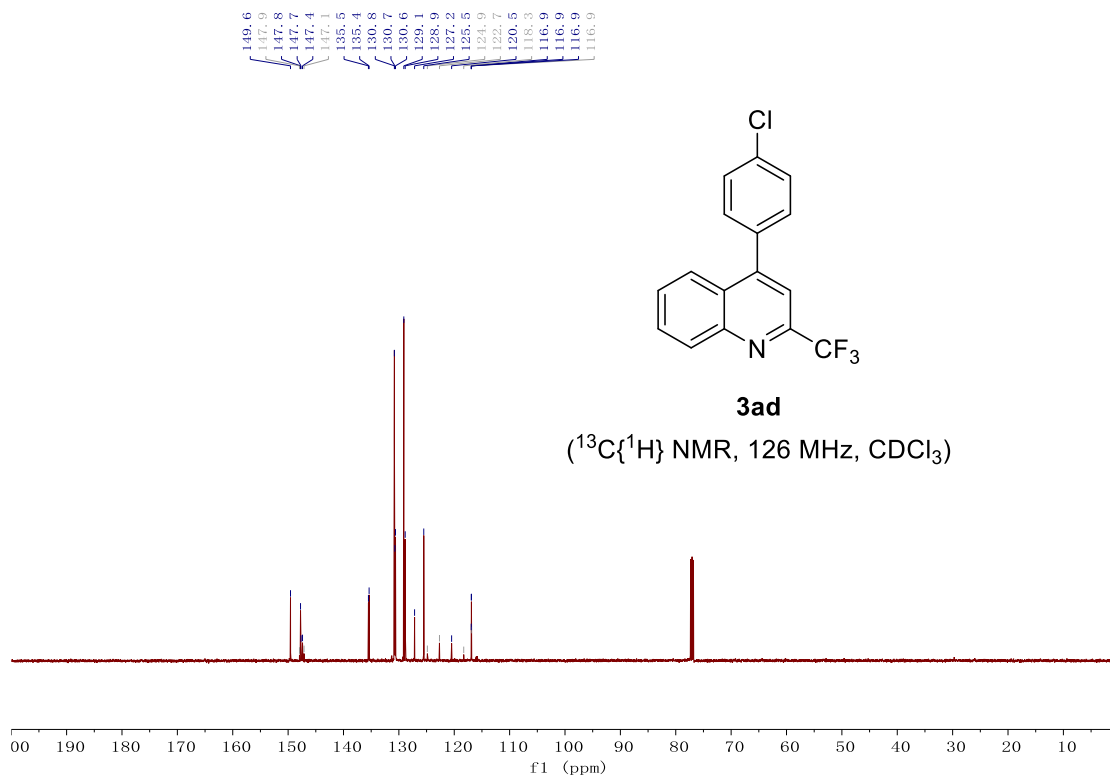

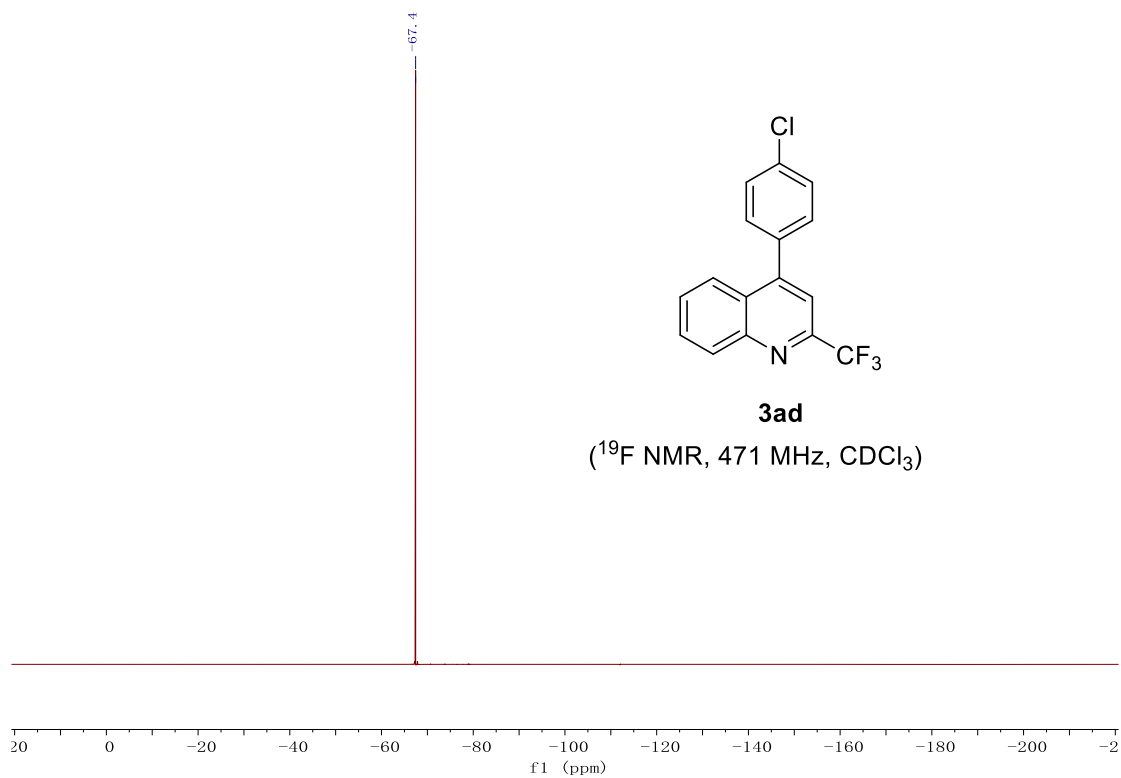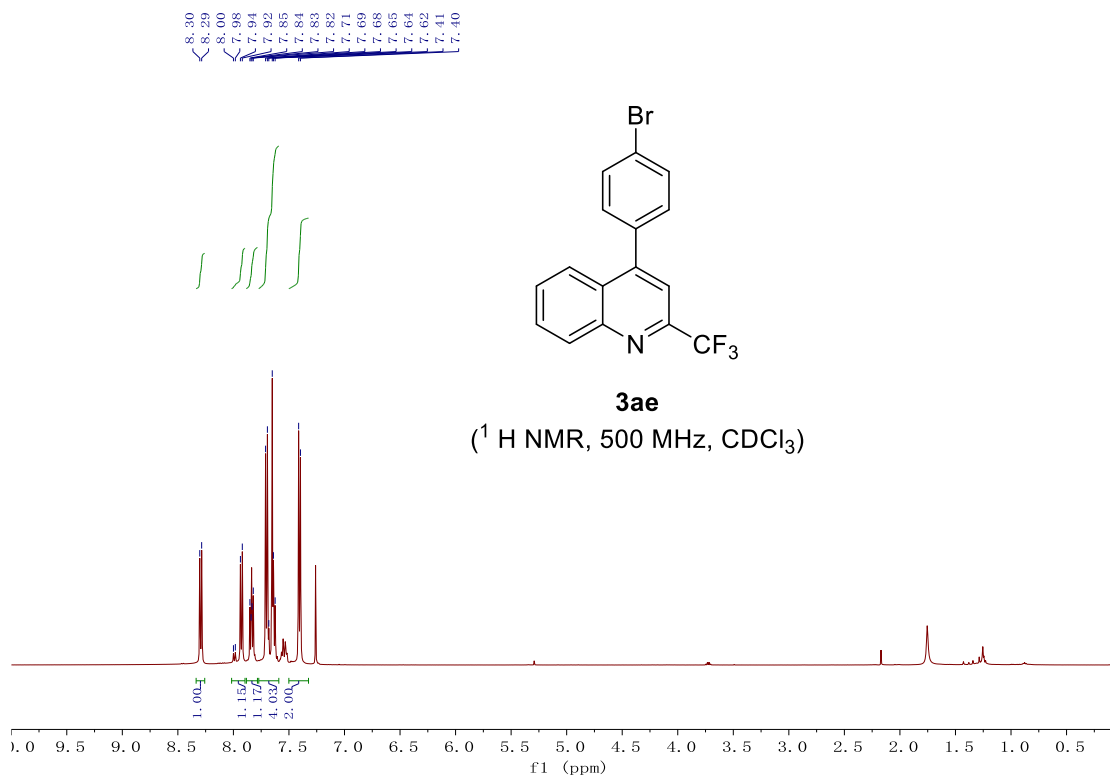

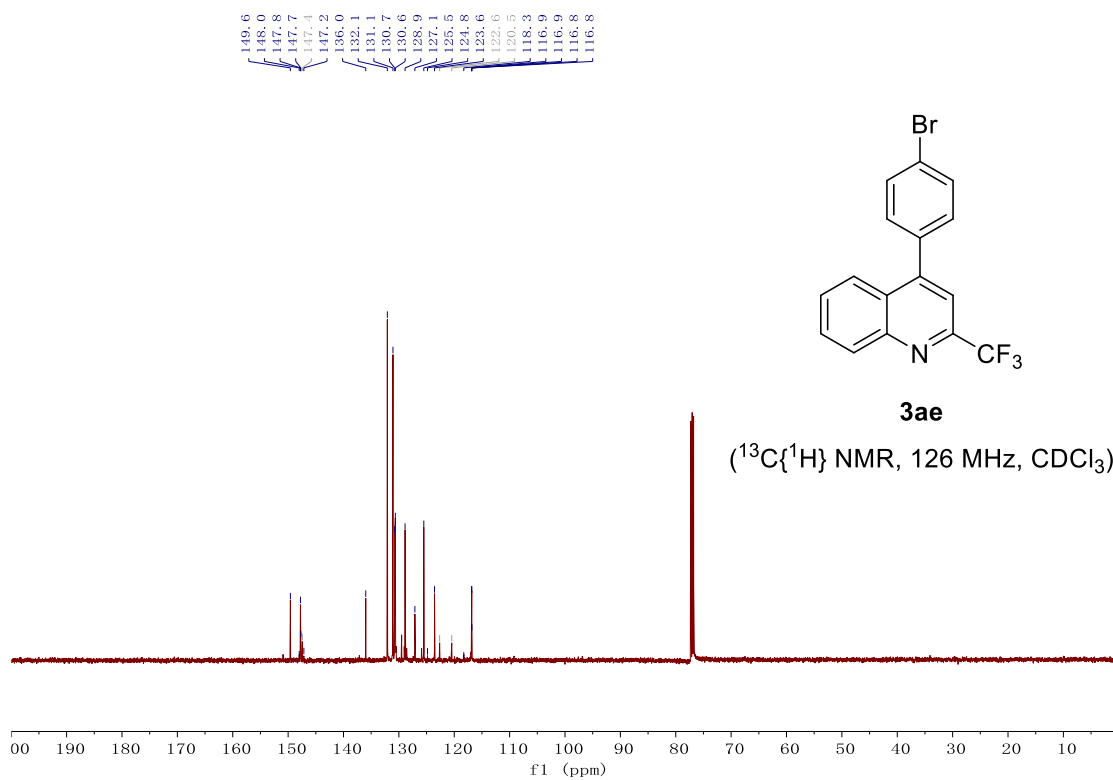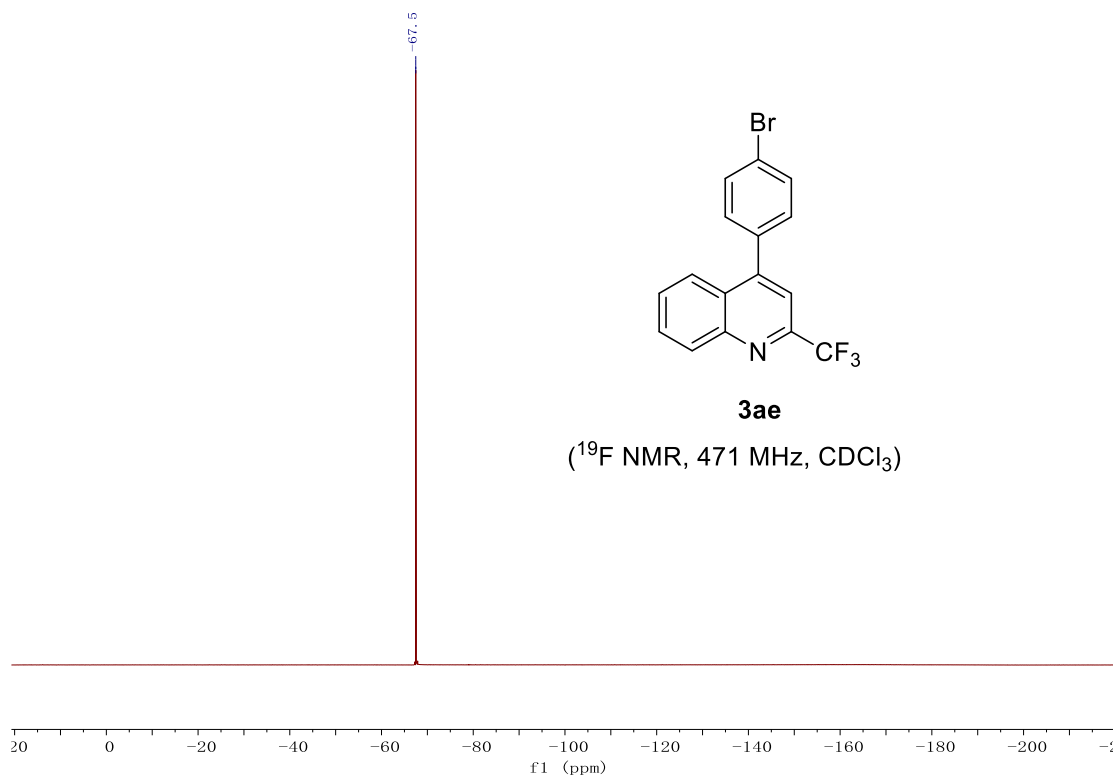

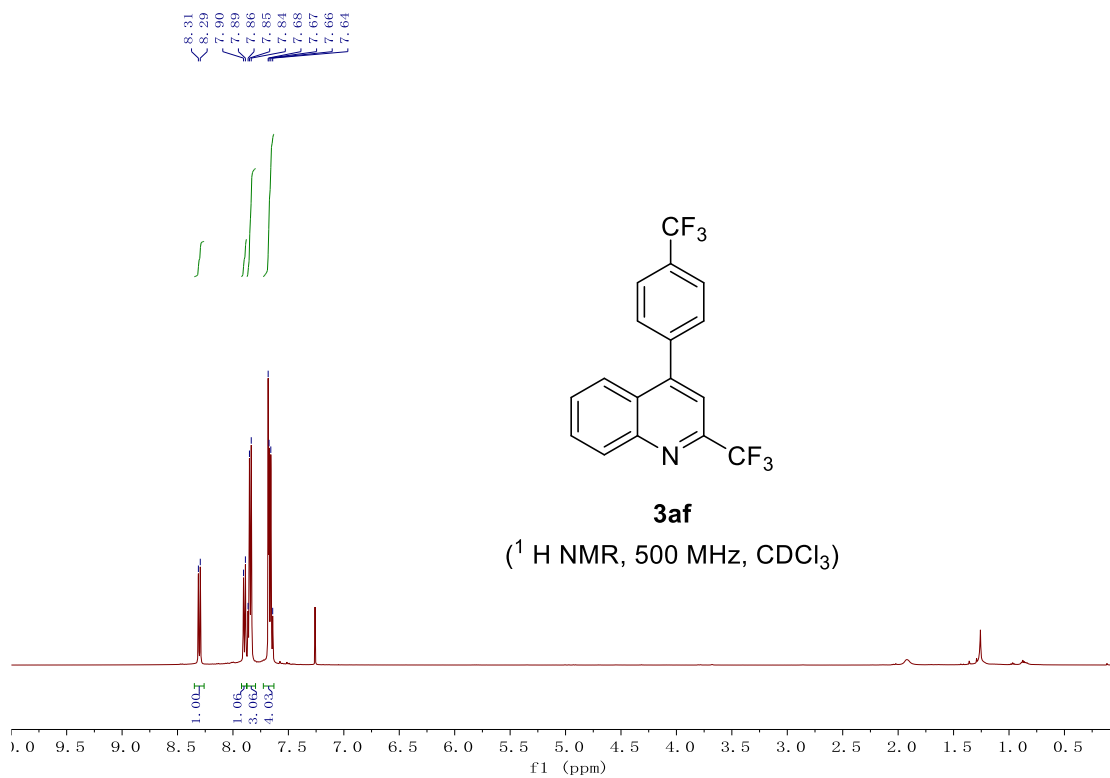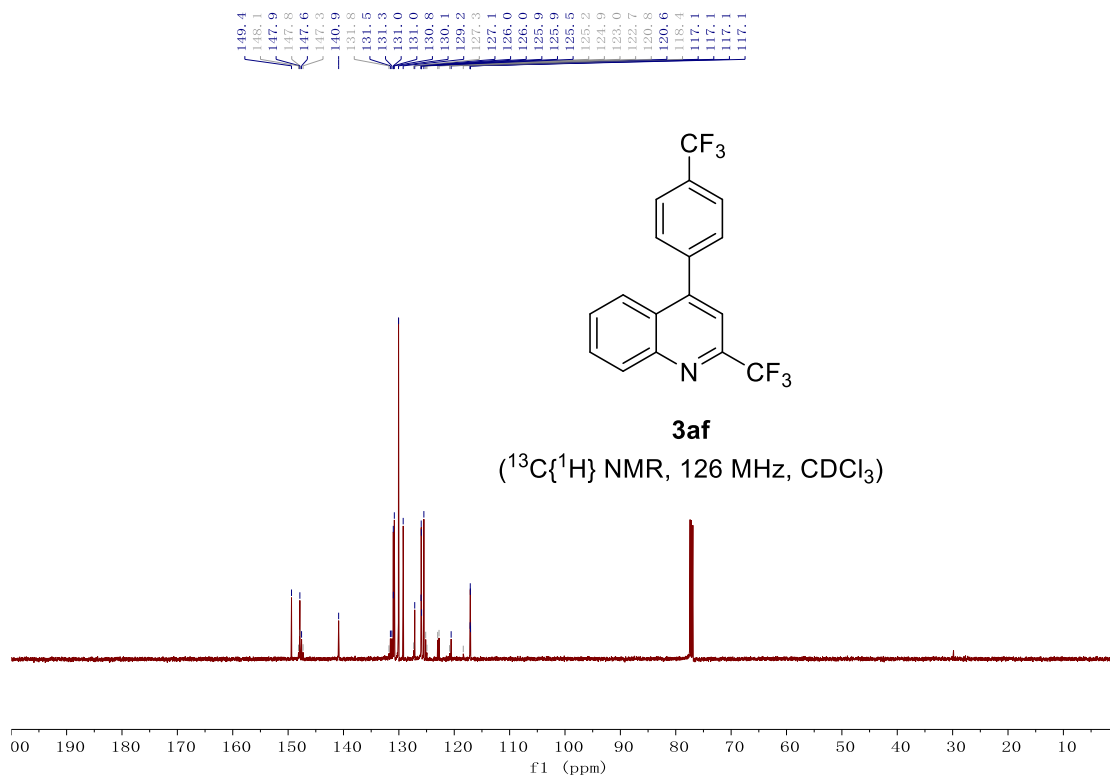

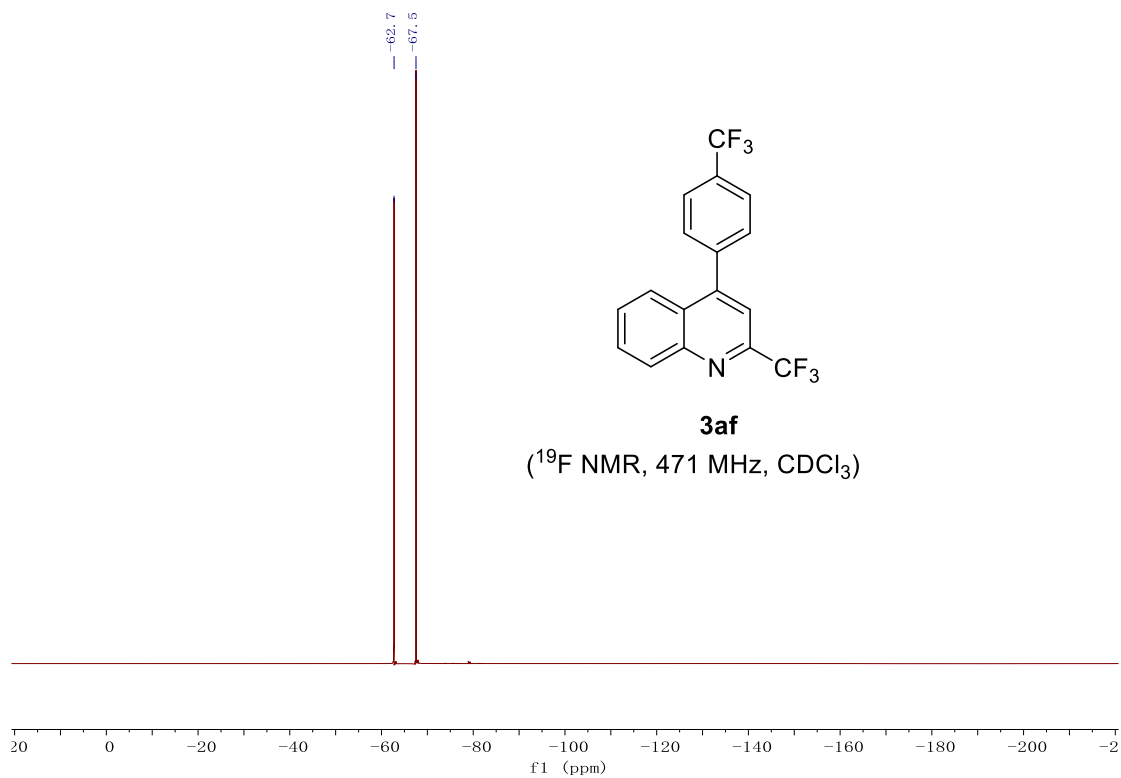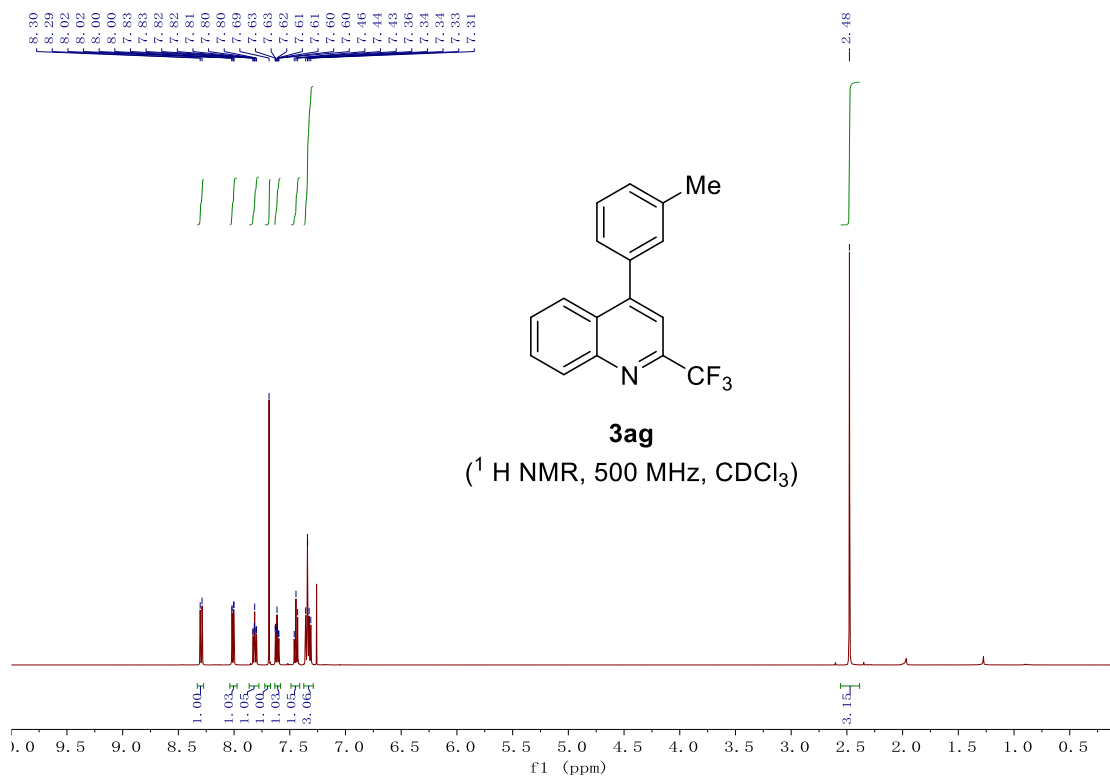

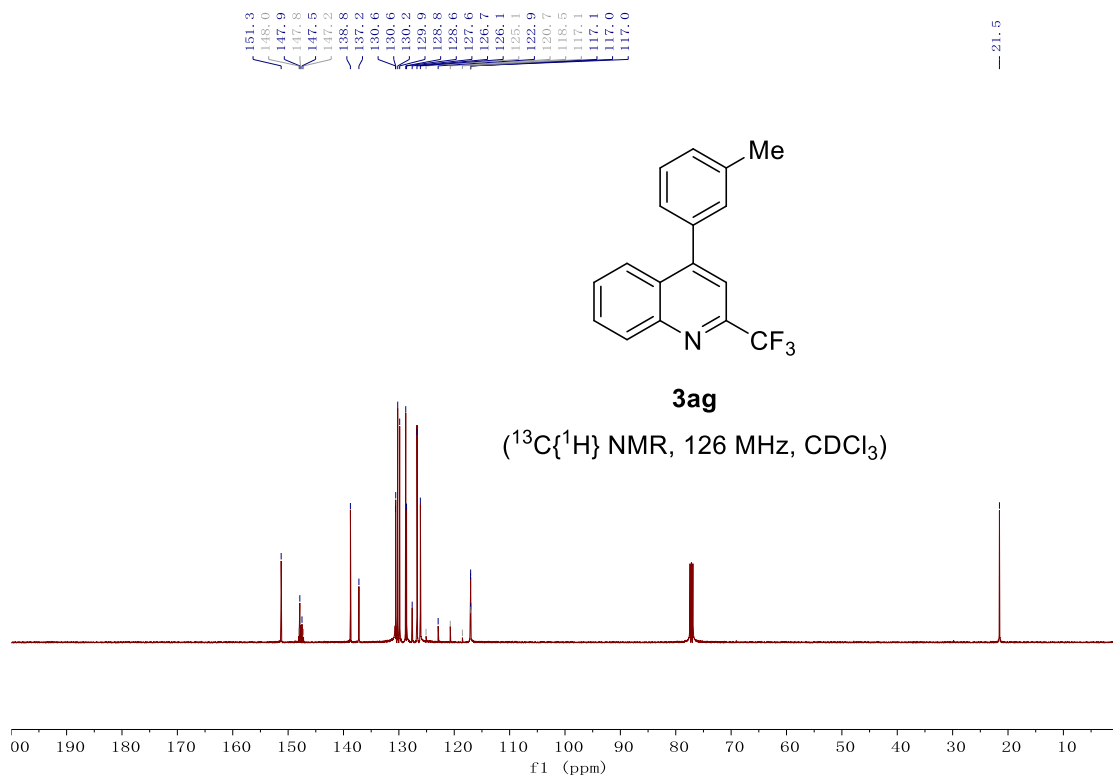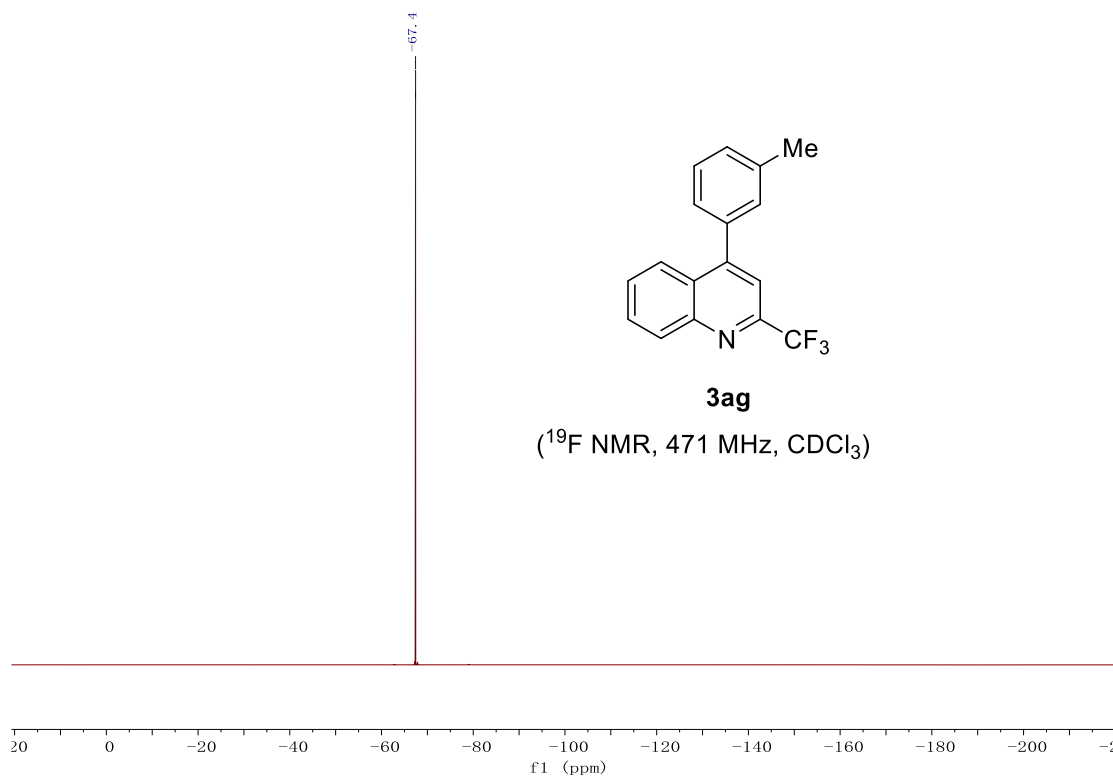



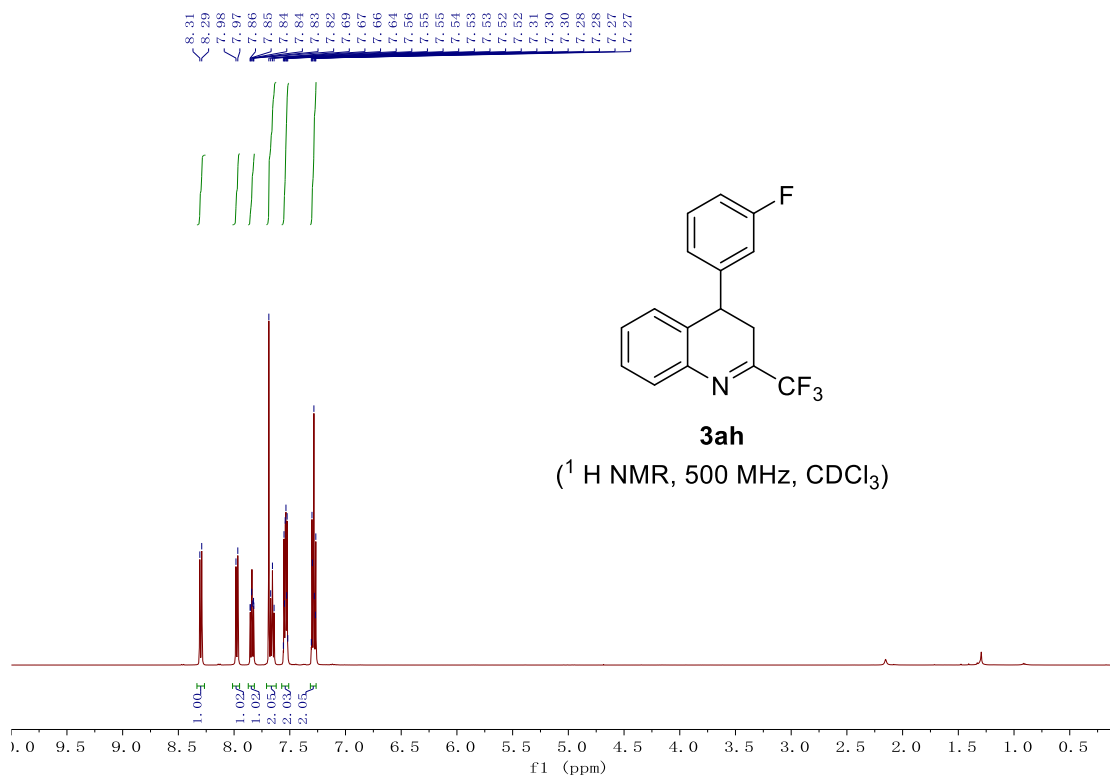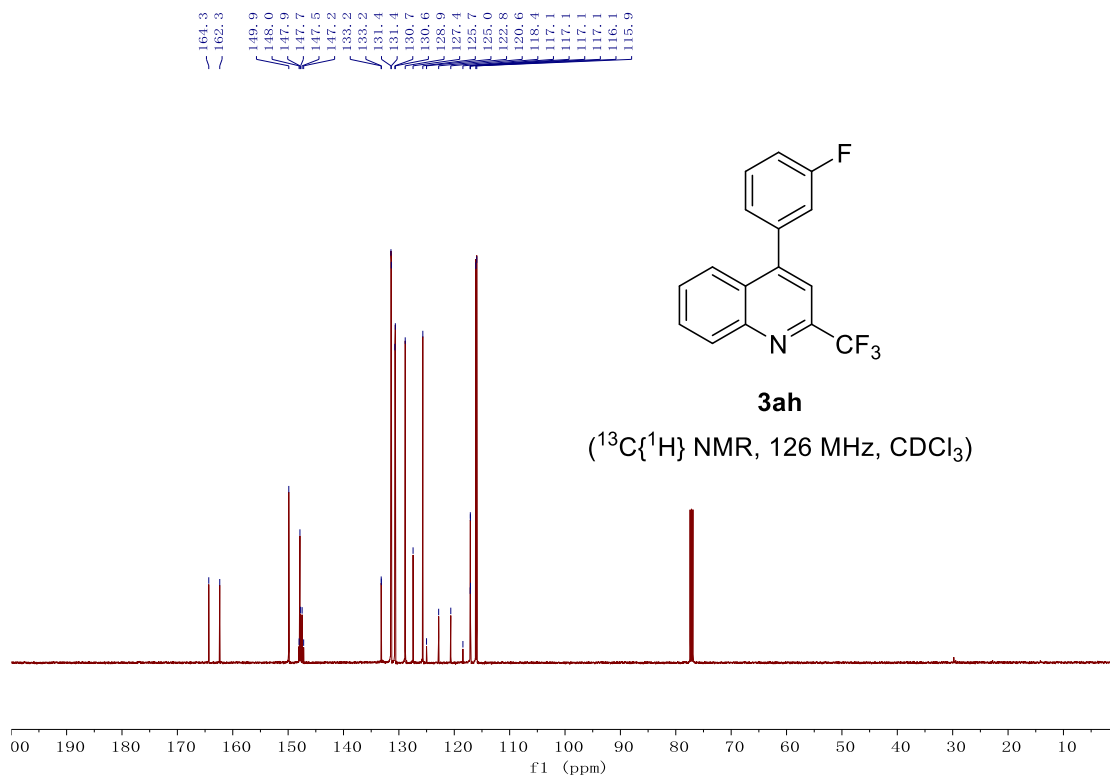

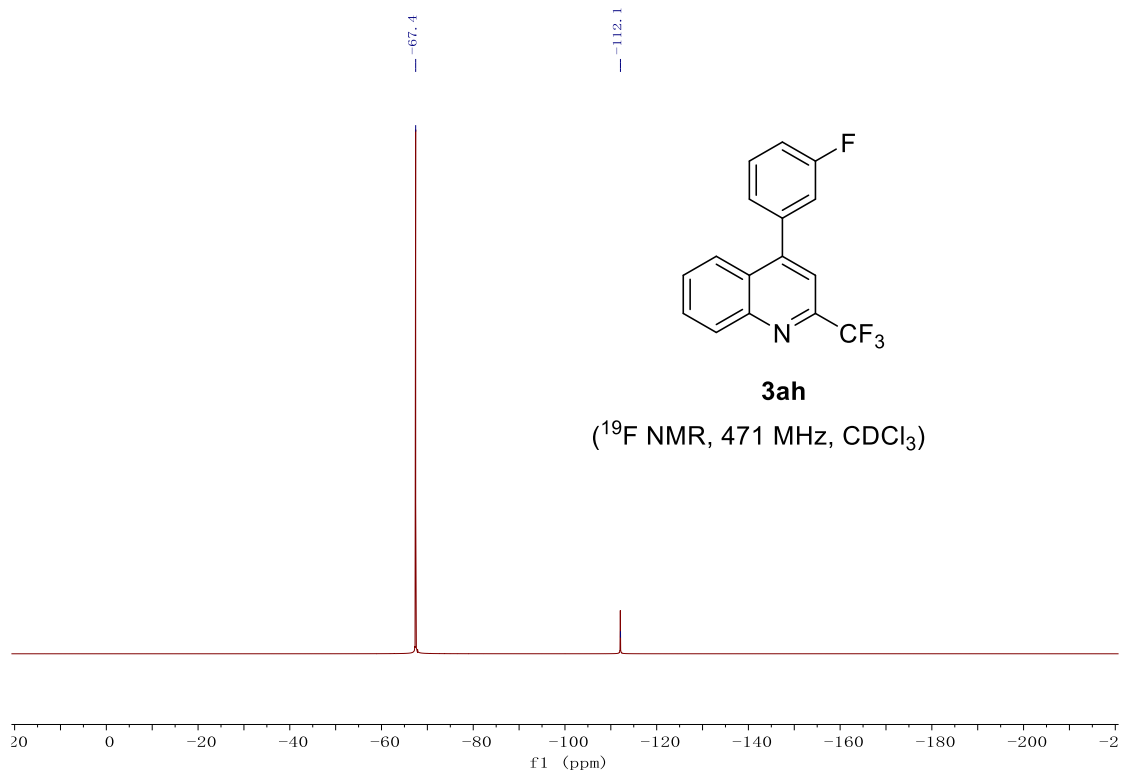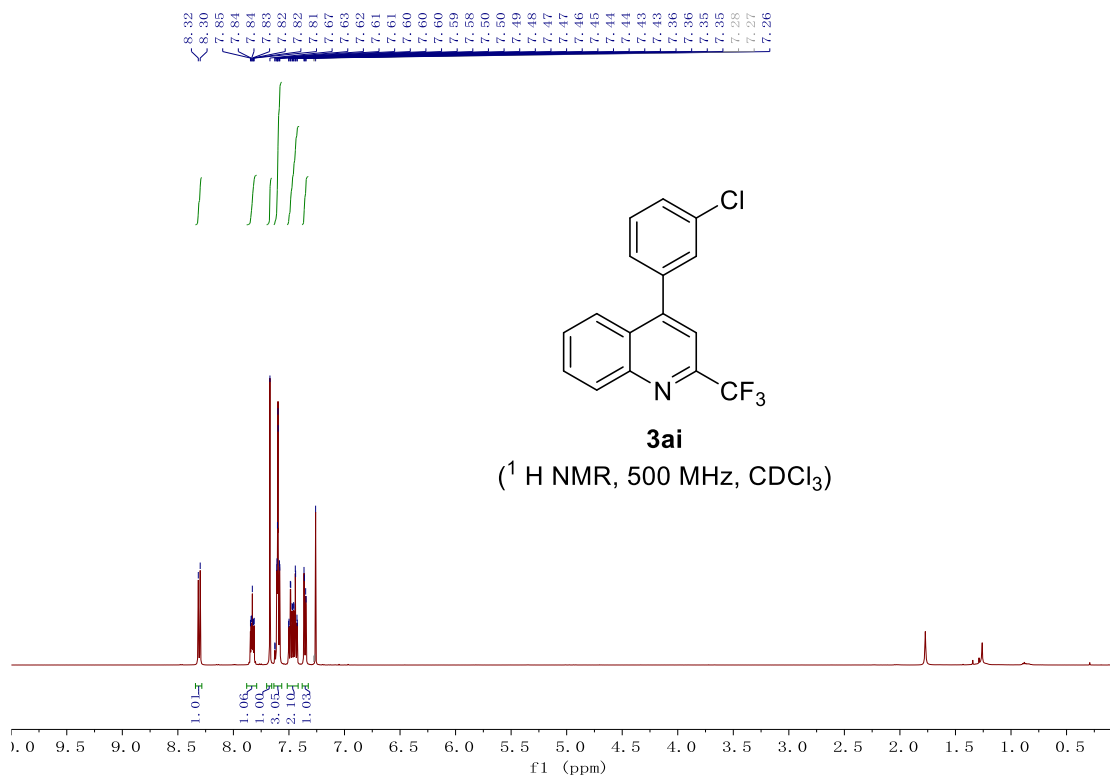

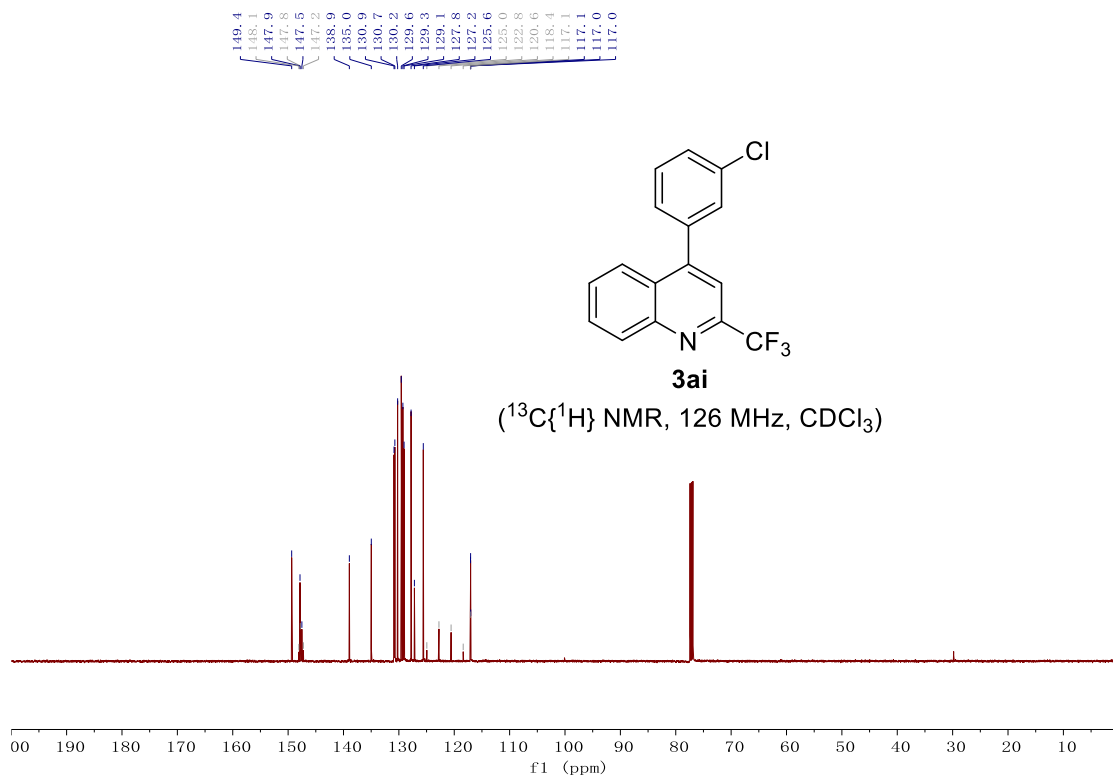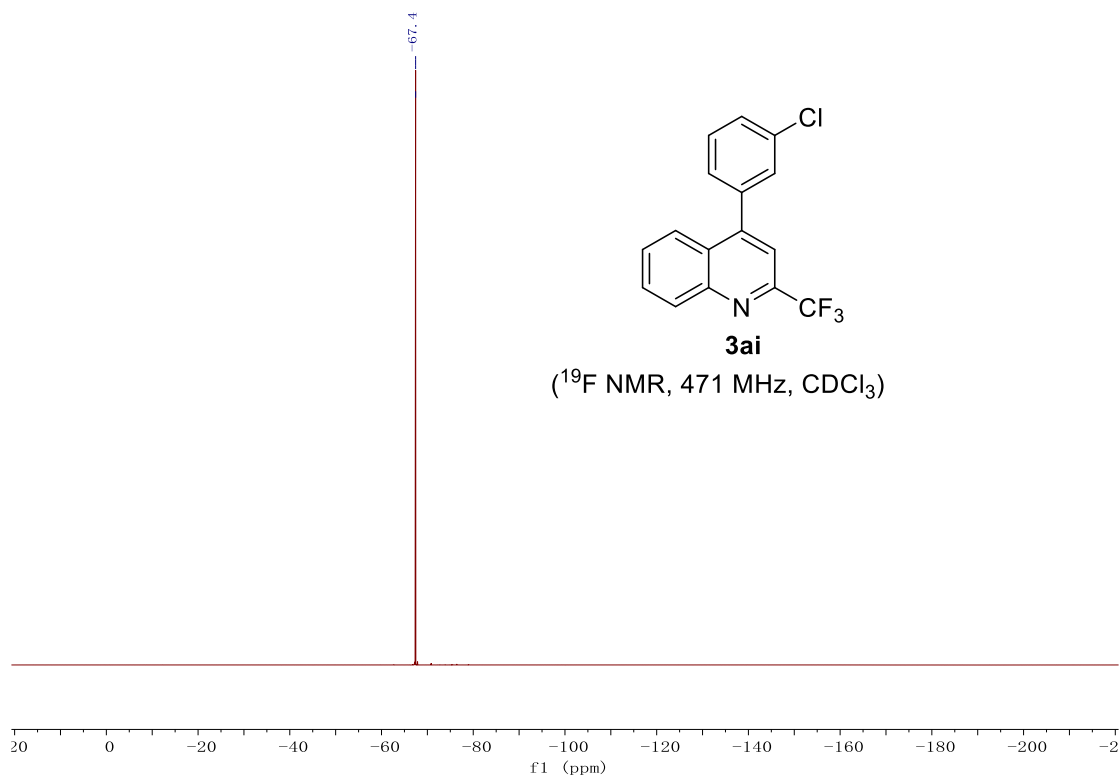

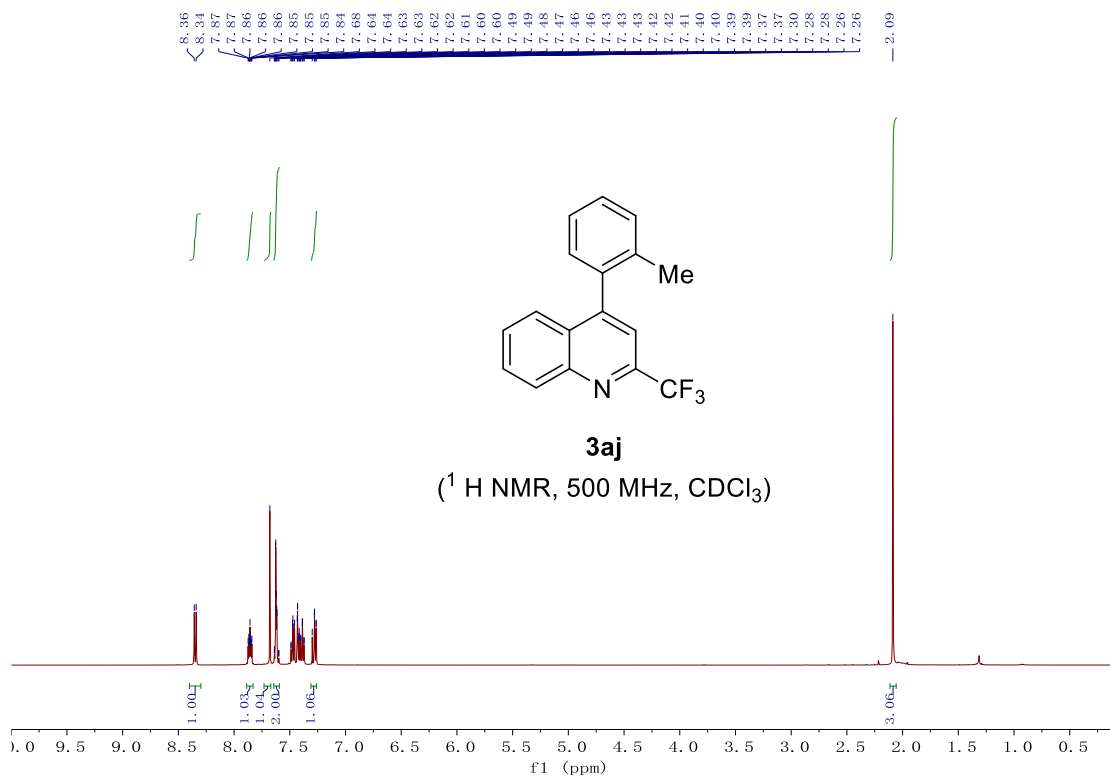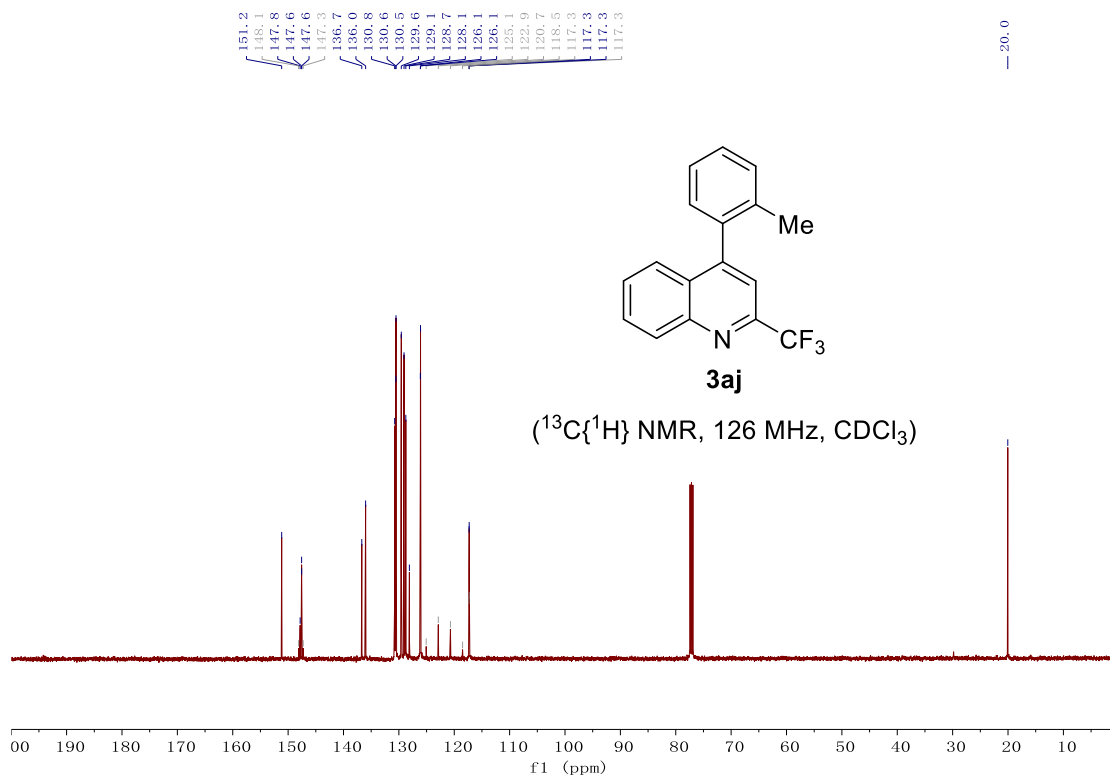

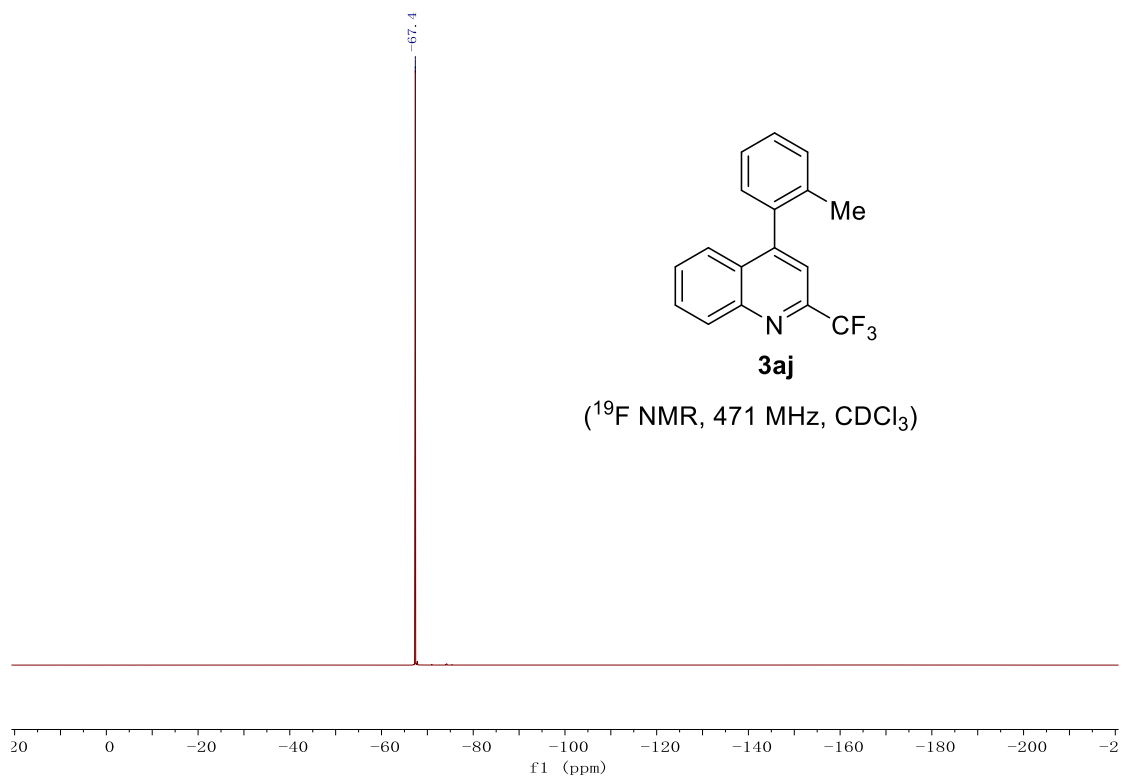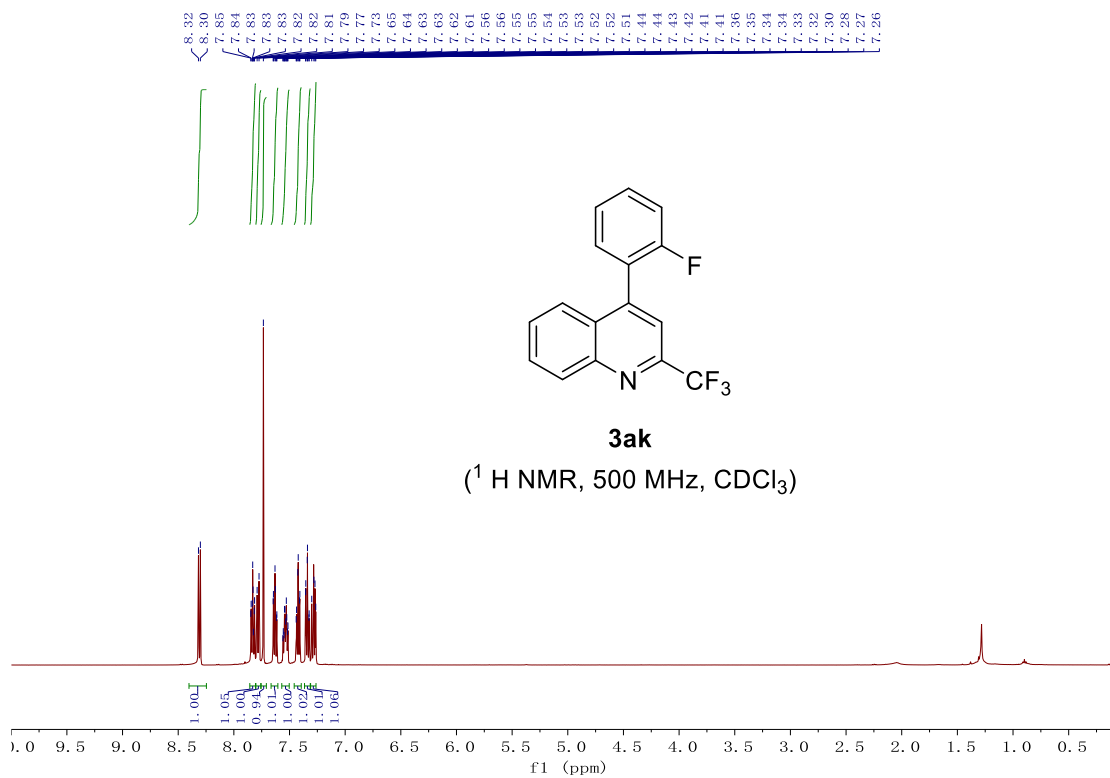

160.6  
158.6  
148.0  
147.7  
147.6  
147.6  
147.2  
145.2  
131.6  
131.6  
131.4  
131.3  
130.8  
130.6  
128.9  
127.7  
125.9  
125.9  
125.0  
124.7  
124.7  
124.6  
122.8  
120.6  
118.4  
118.0  
118.0  
118.0  
116.4  
116.2

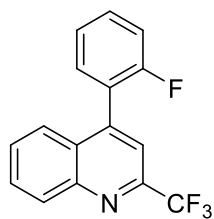

**3ak**

(<sup>13</sup>C{<sup>1</sup>H} NMR, 126 MHz, CDCl<sub>3</sub>)

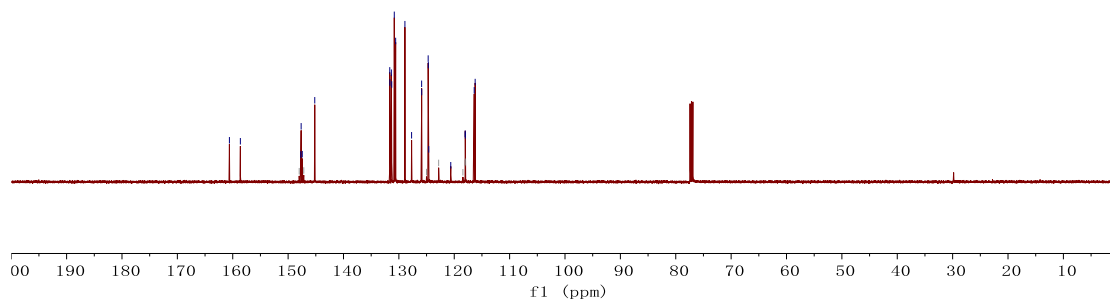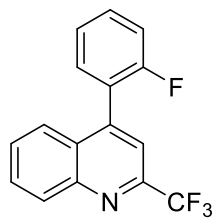

**3ak**

(<sup>19</sup>F NMR, 471 MHz, CDCl<sub>3</sub>)

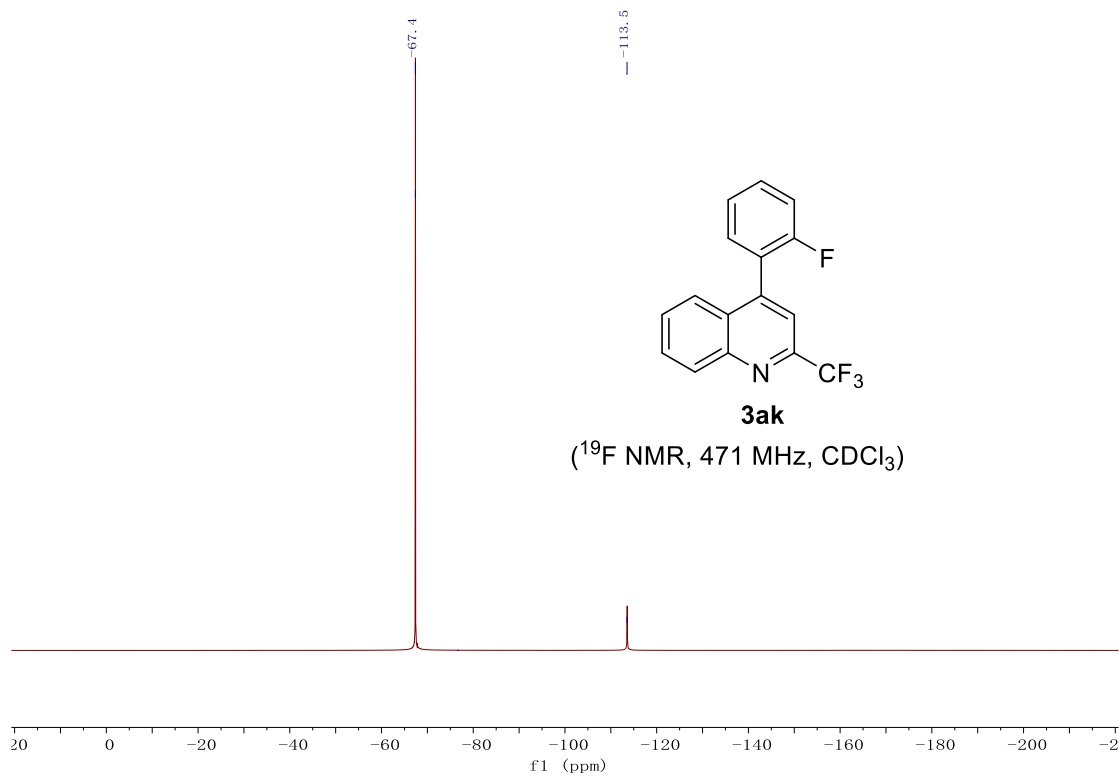

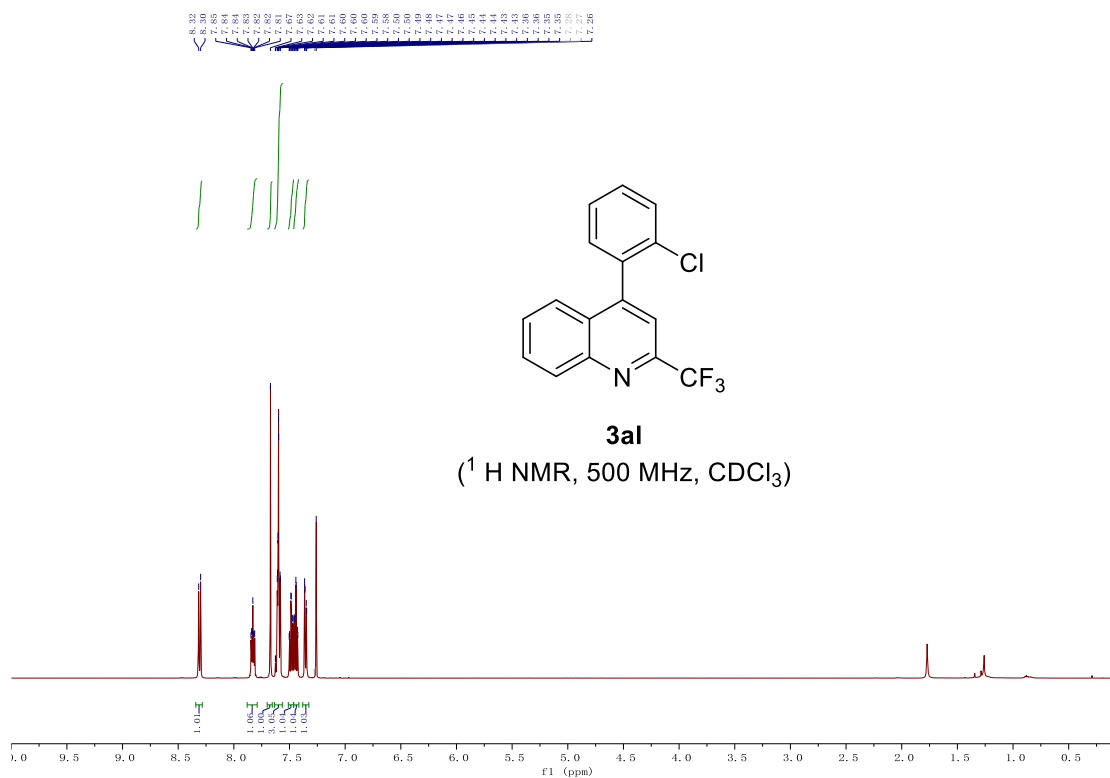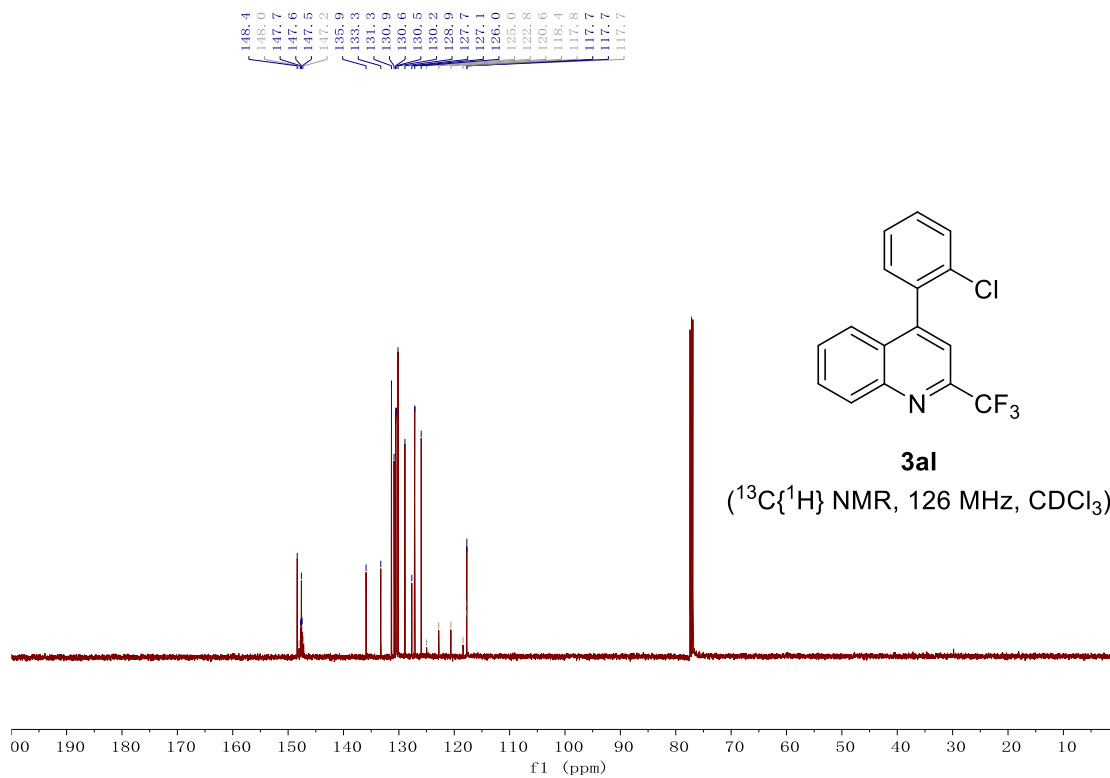

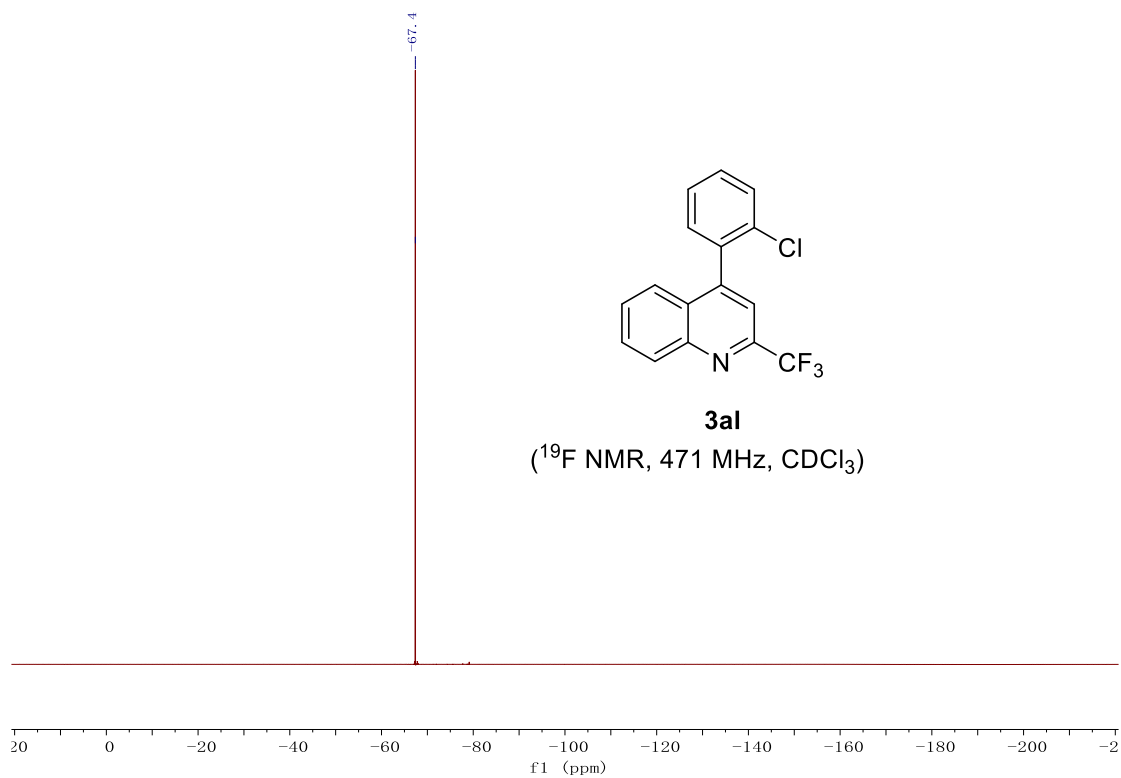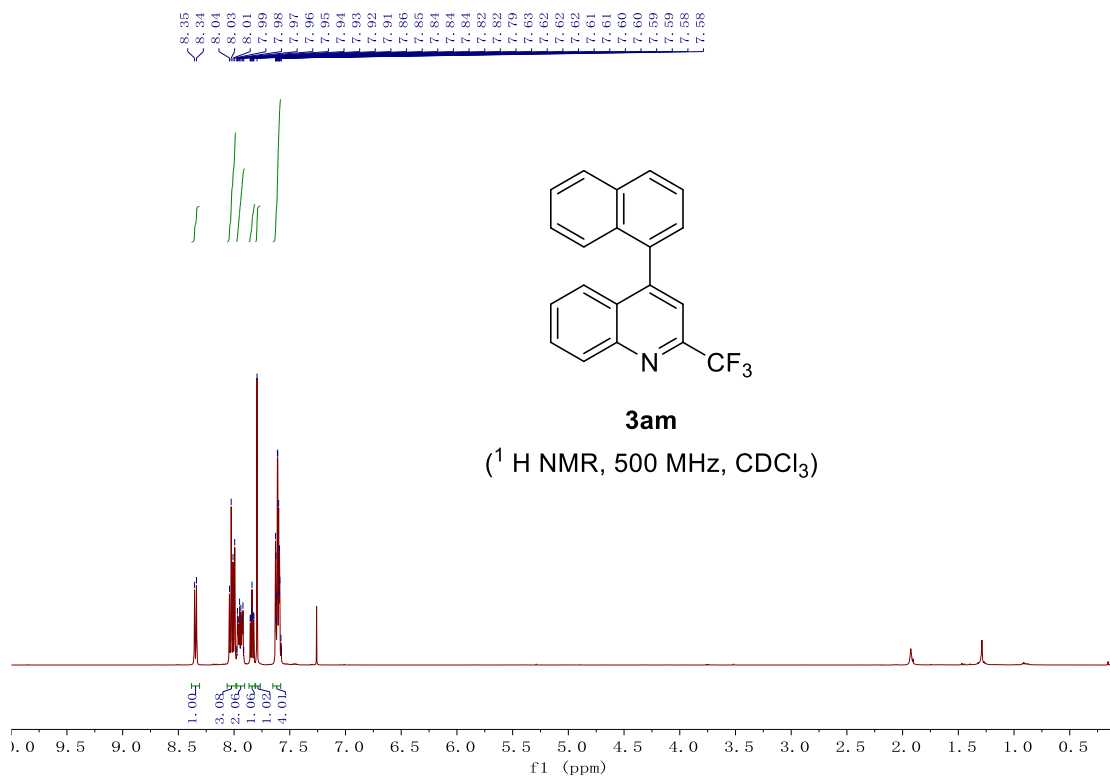



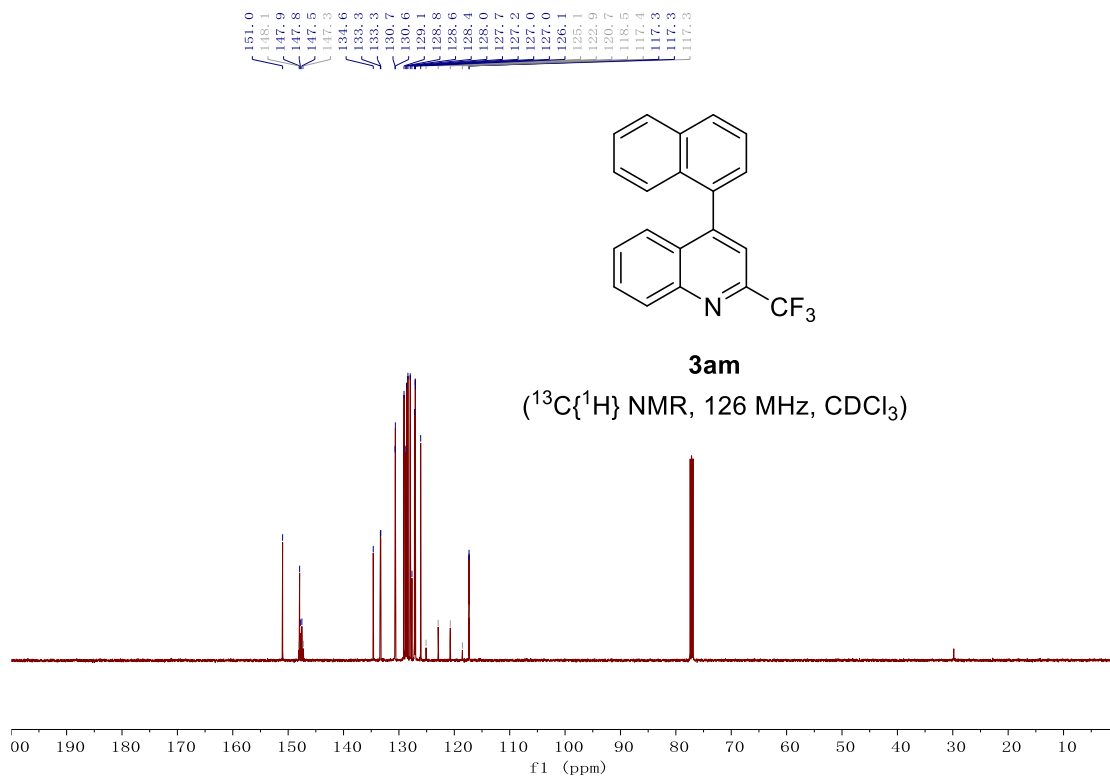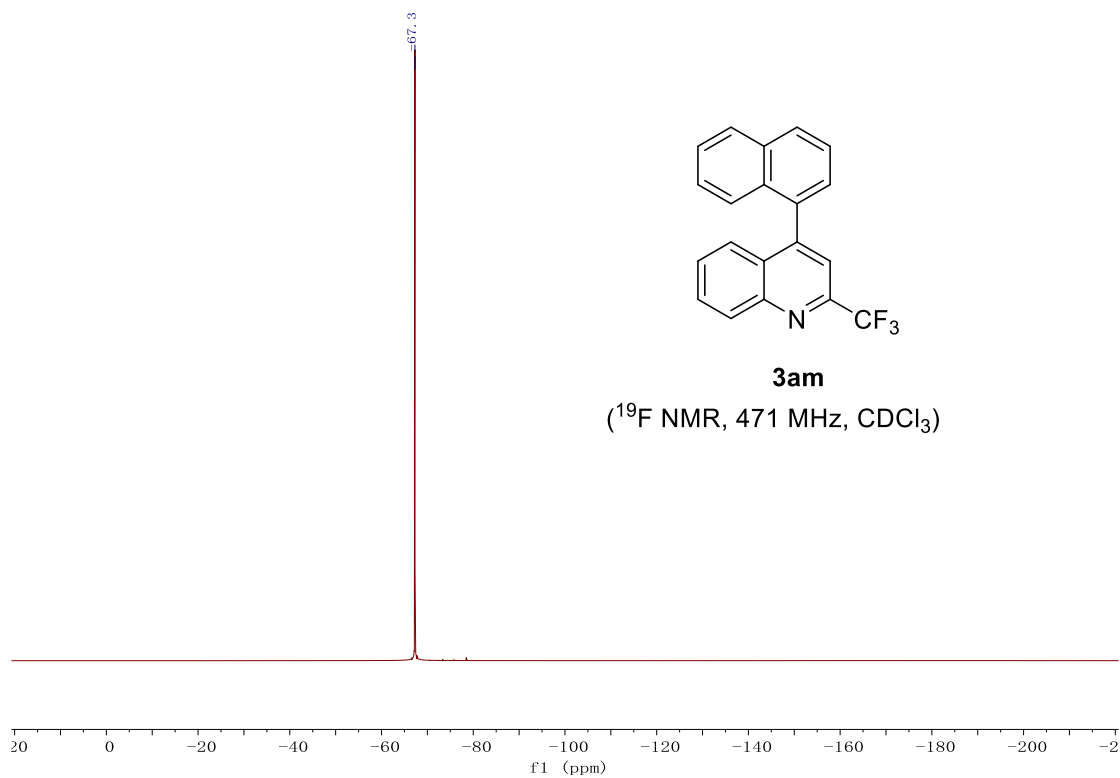

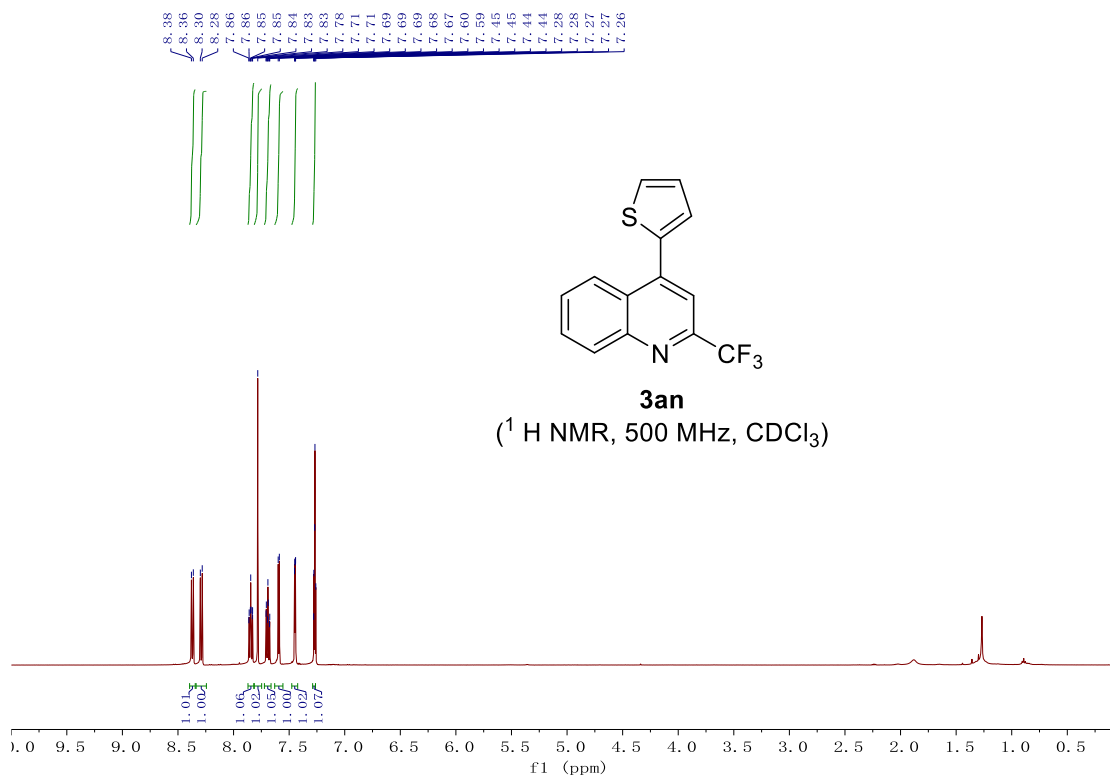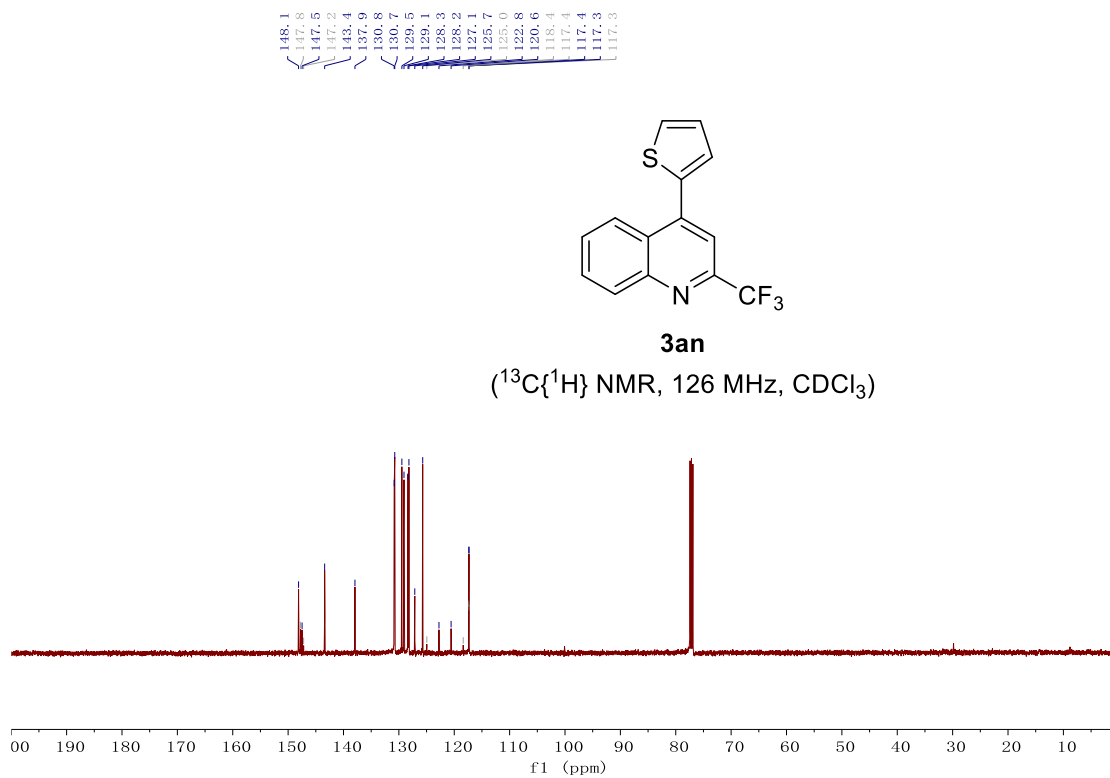

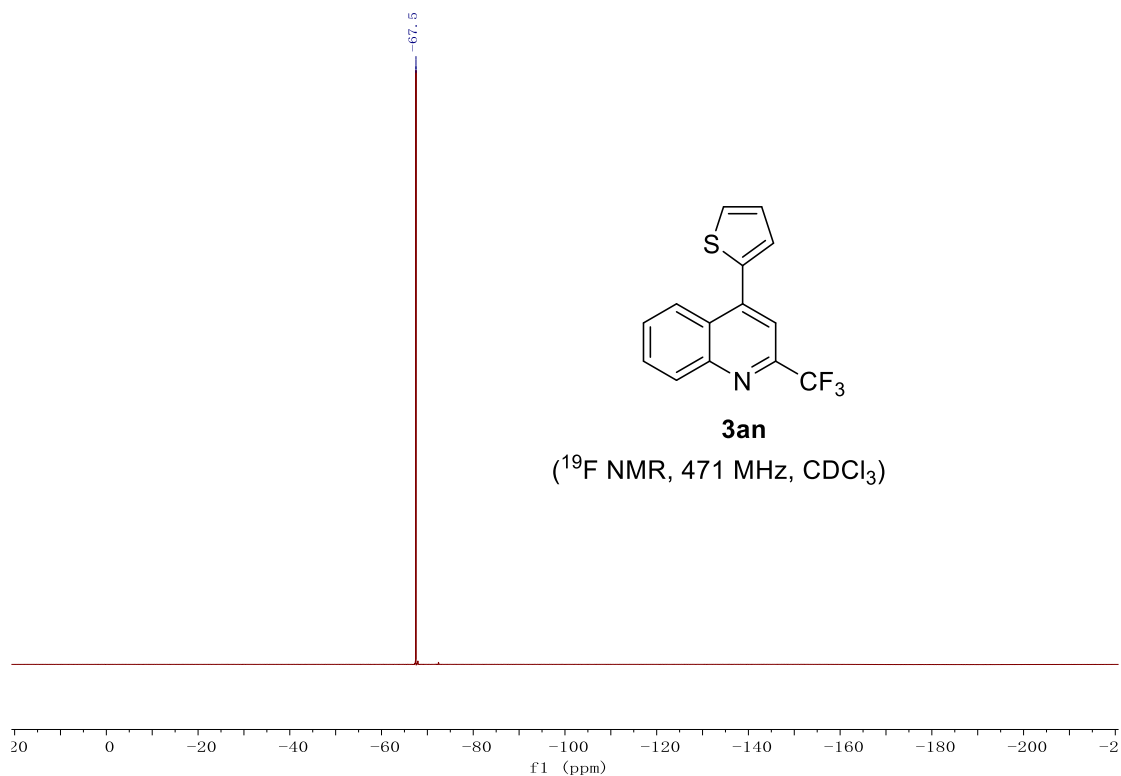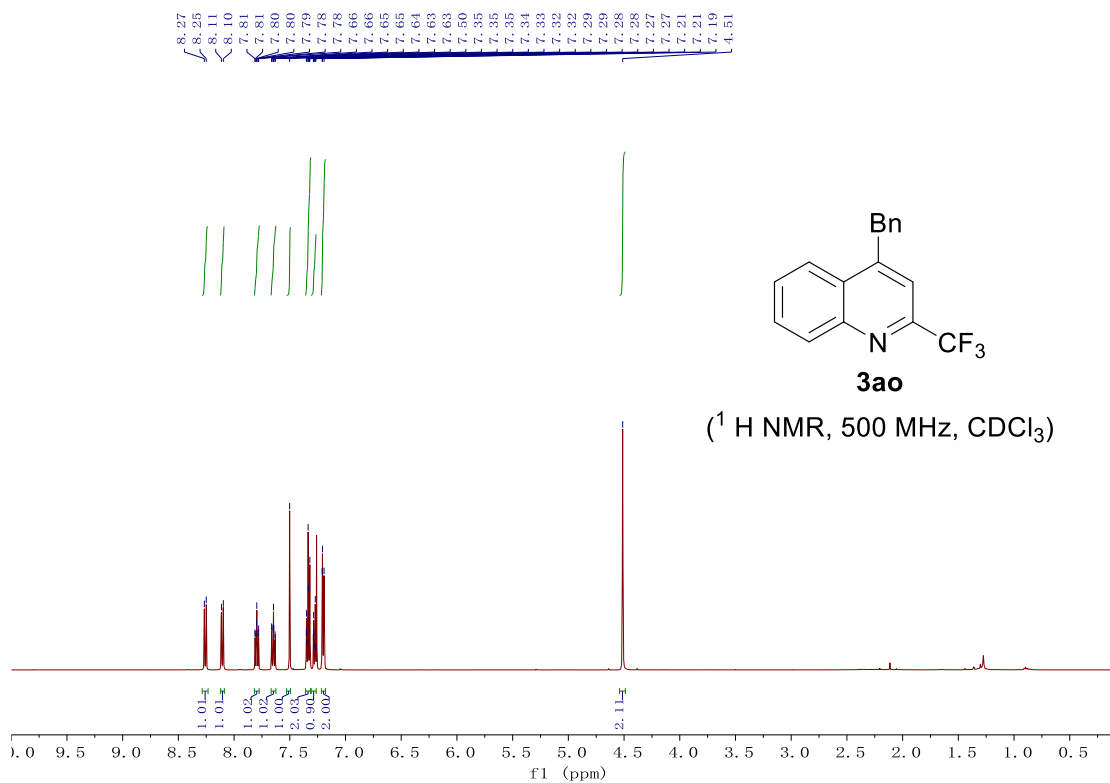

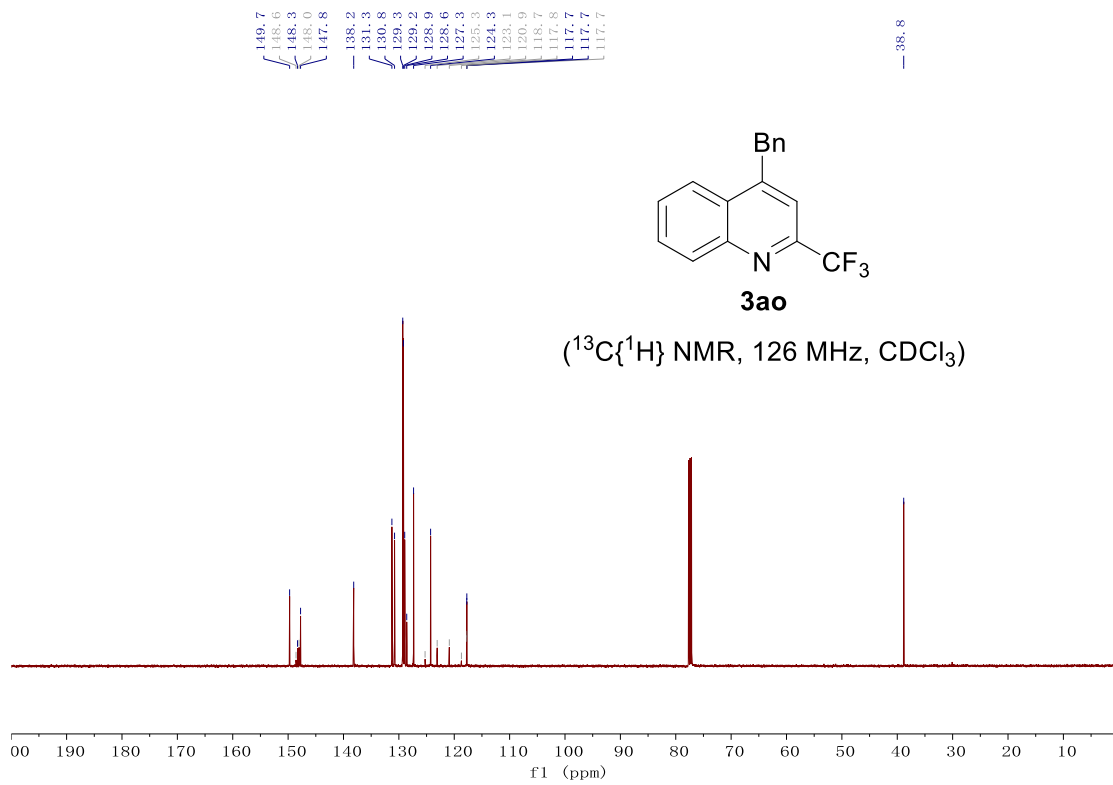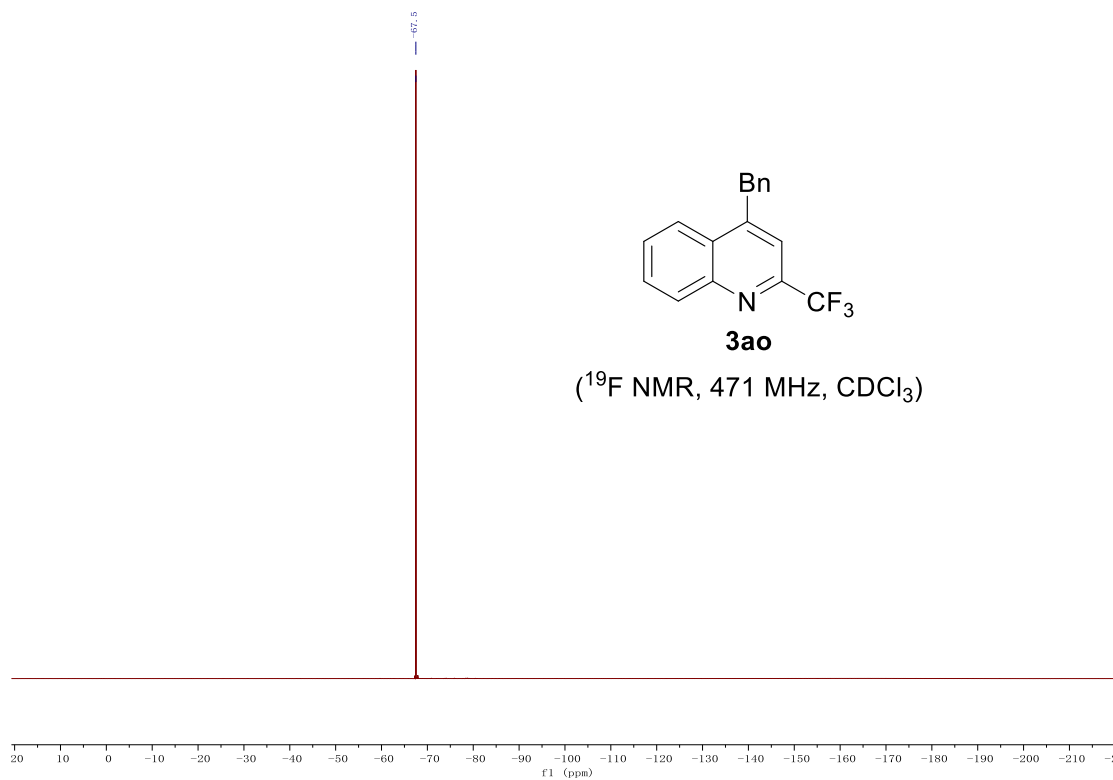

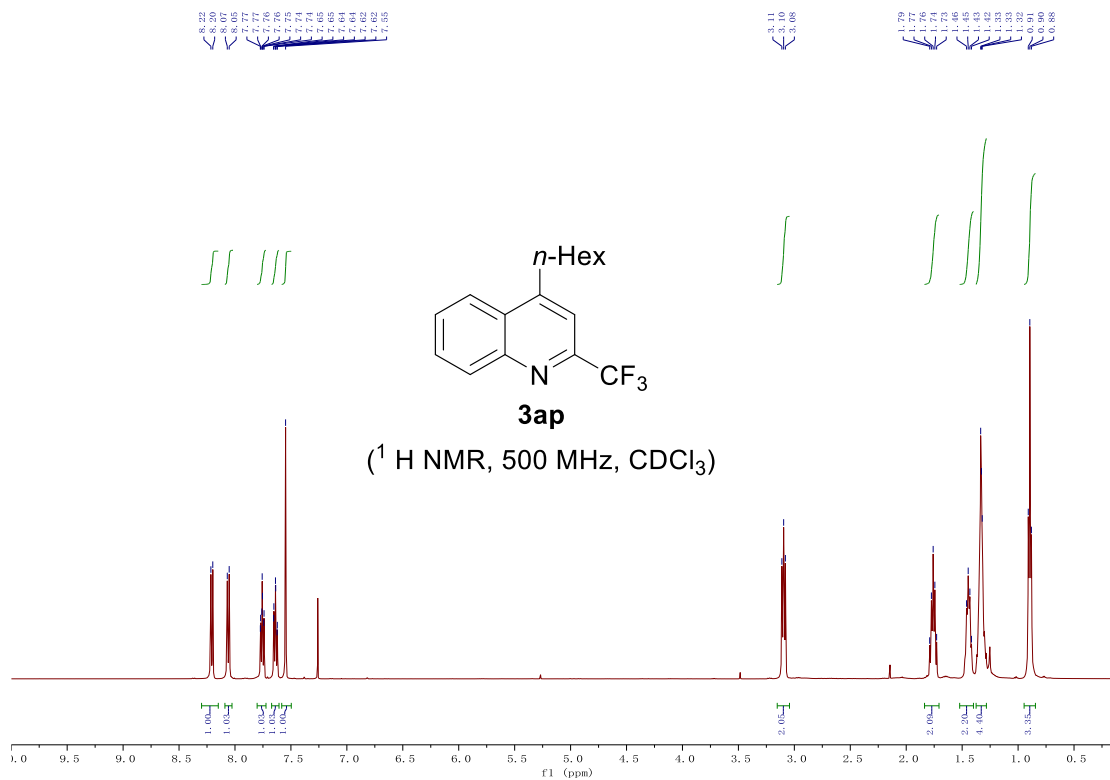

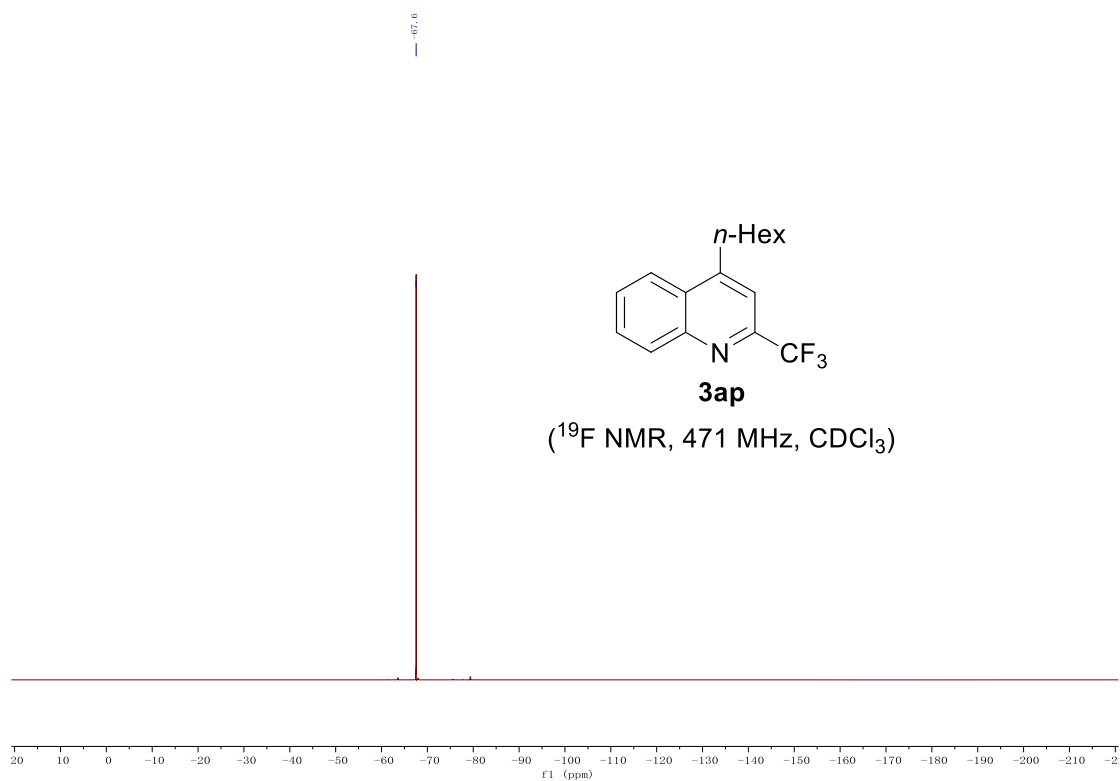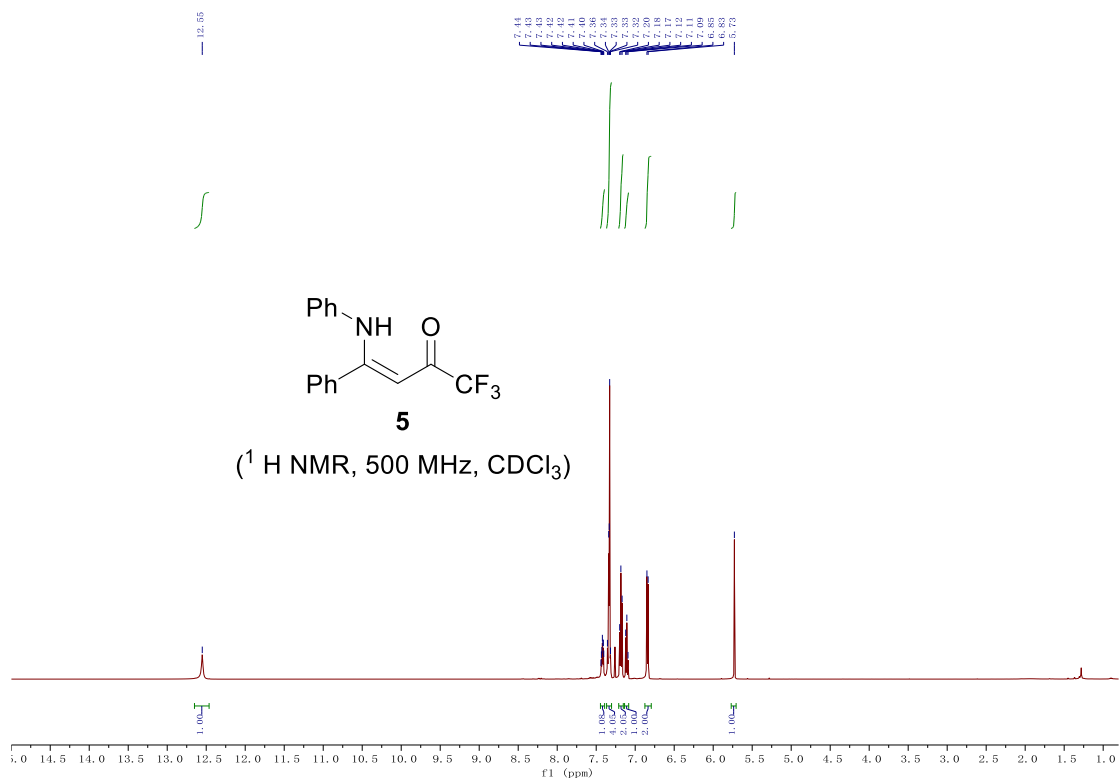

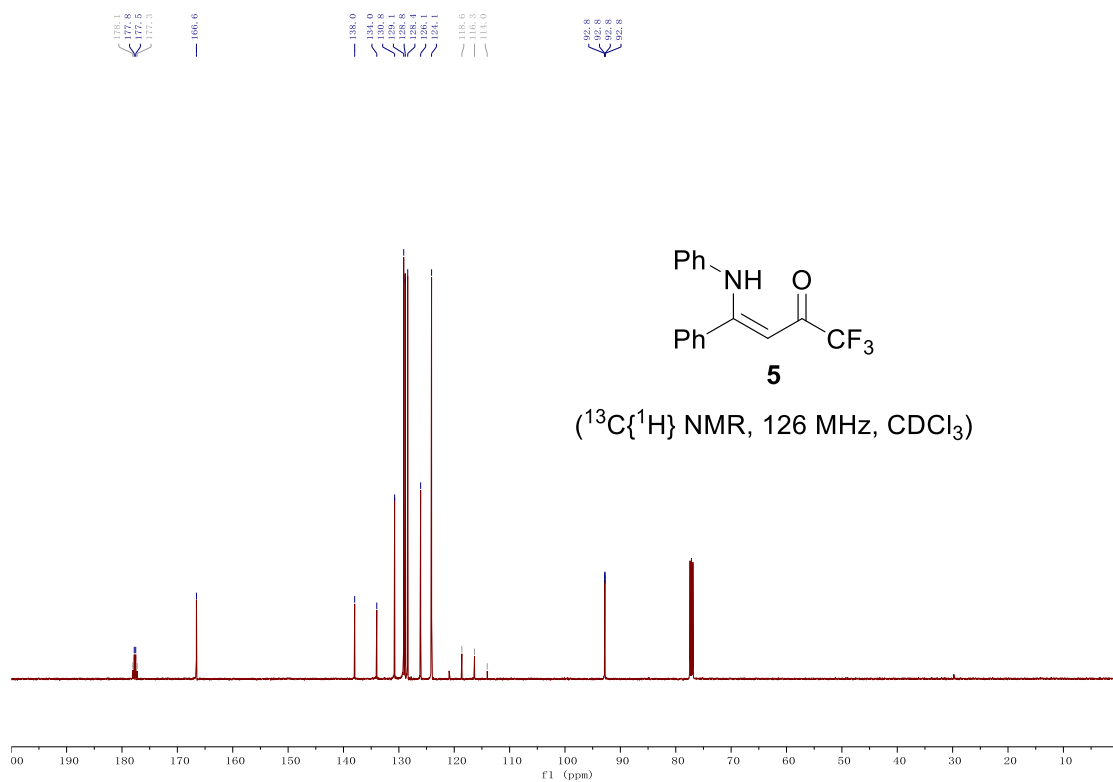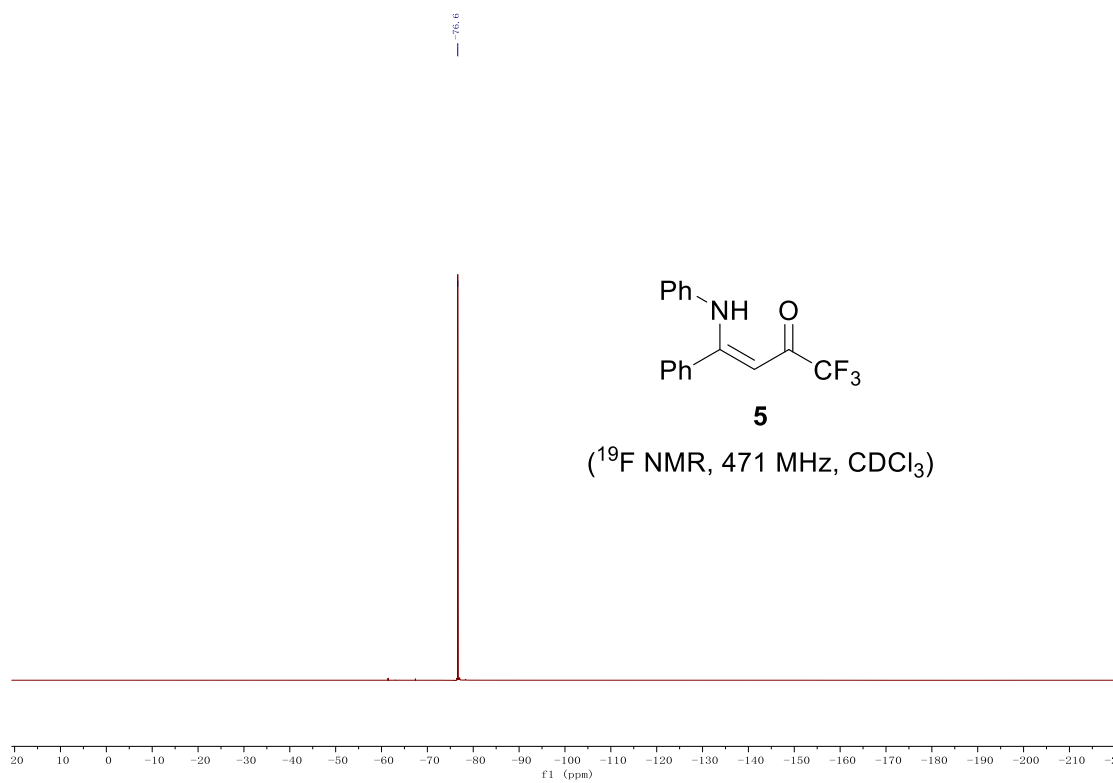

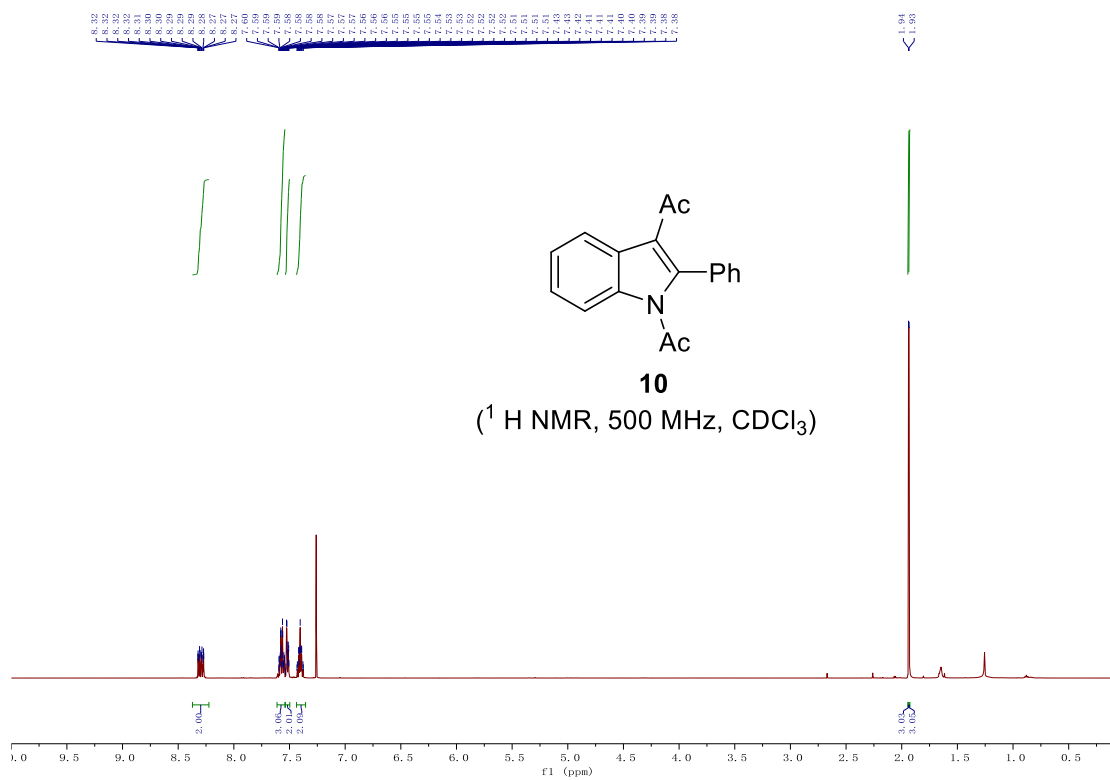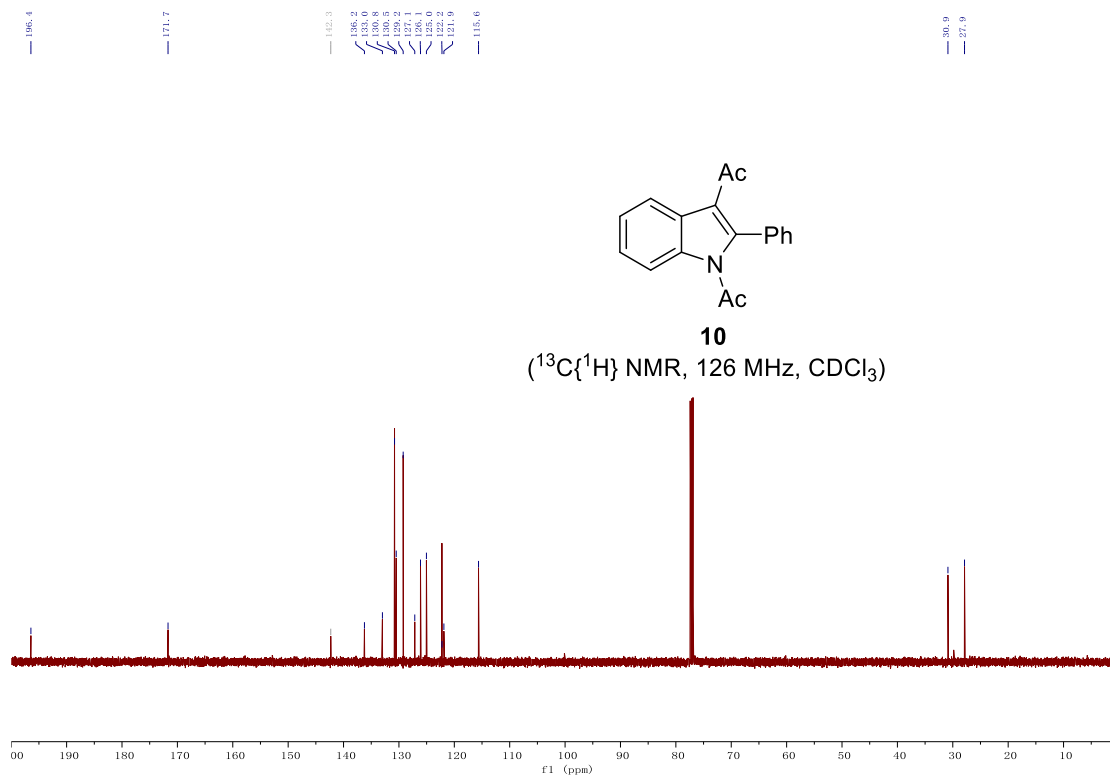



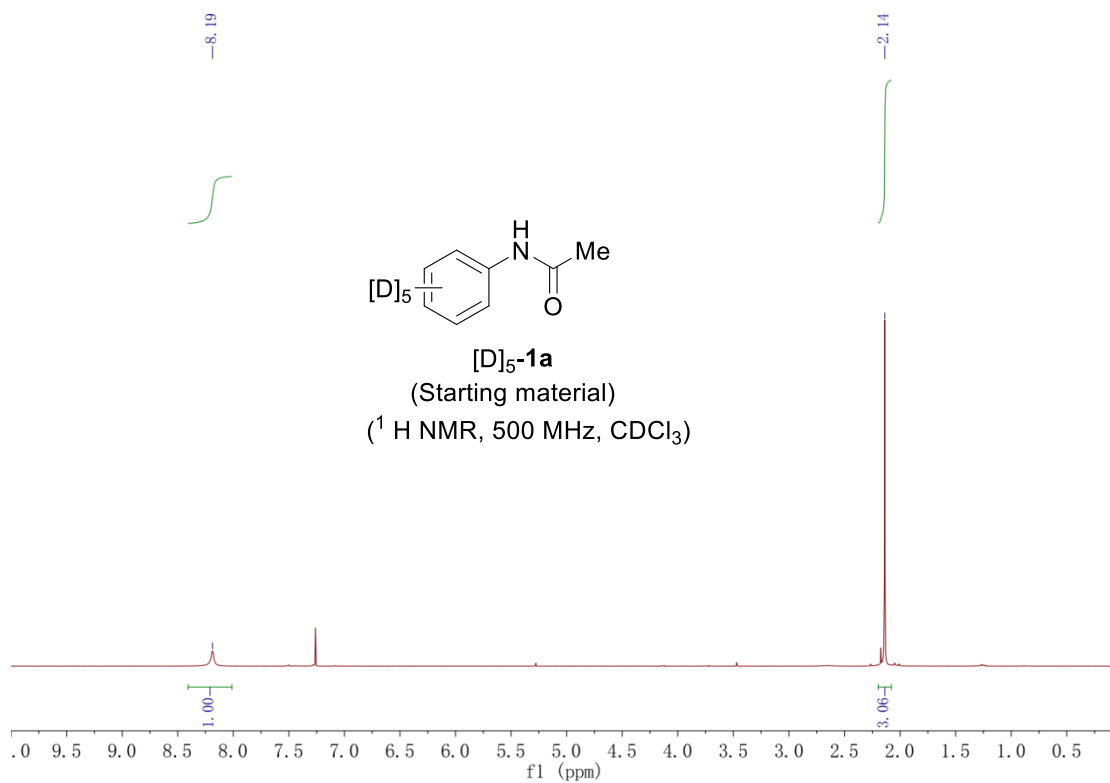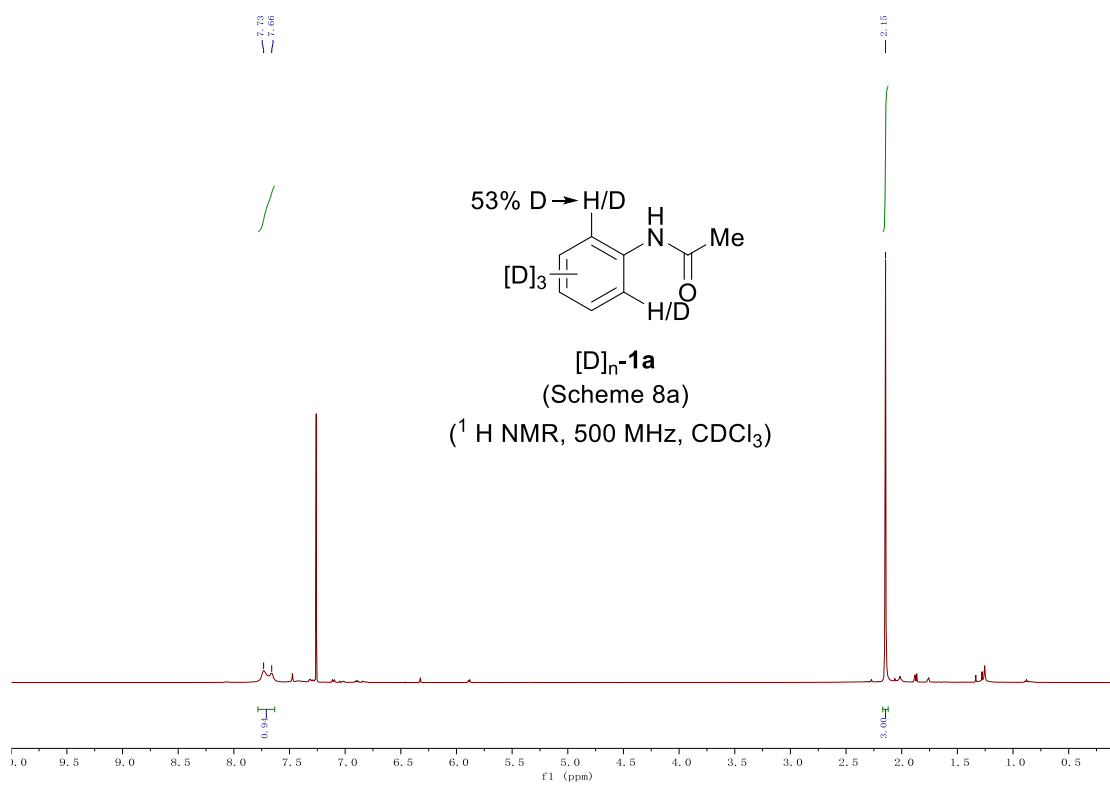

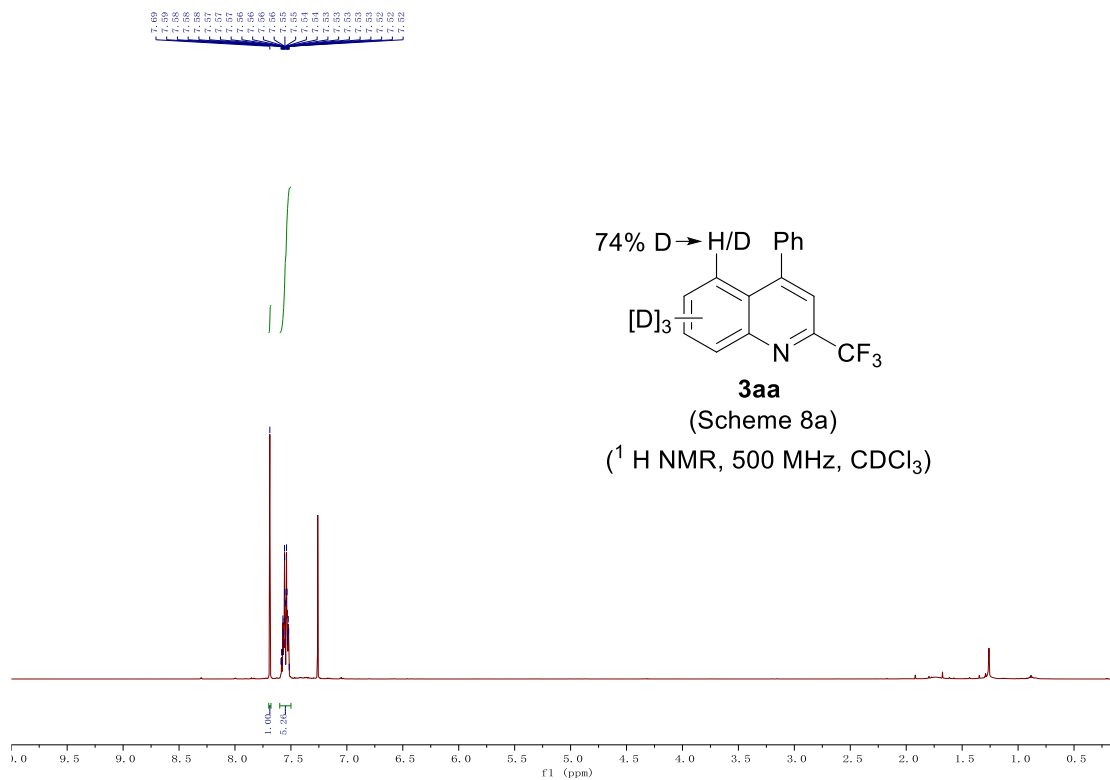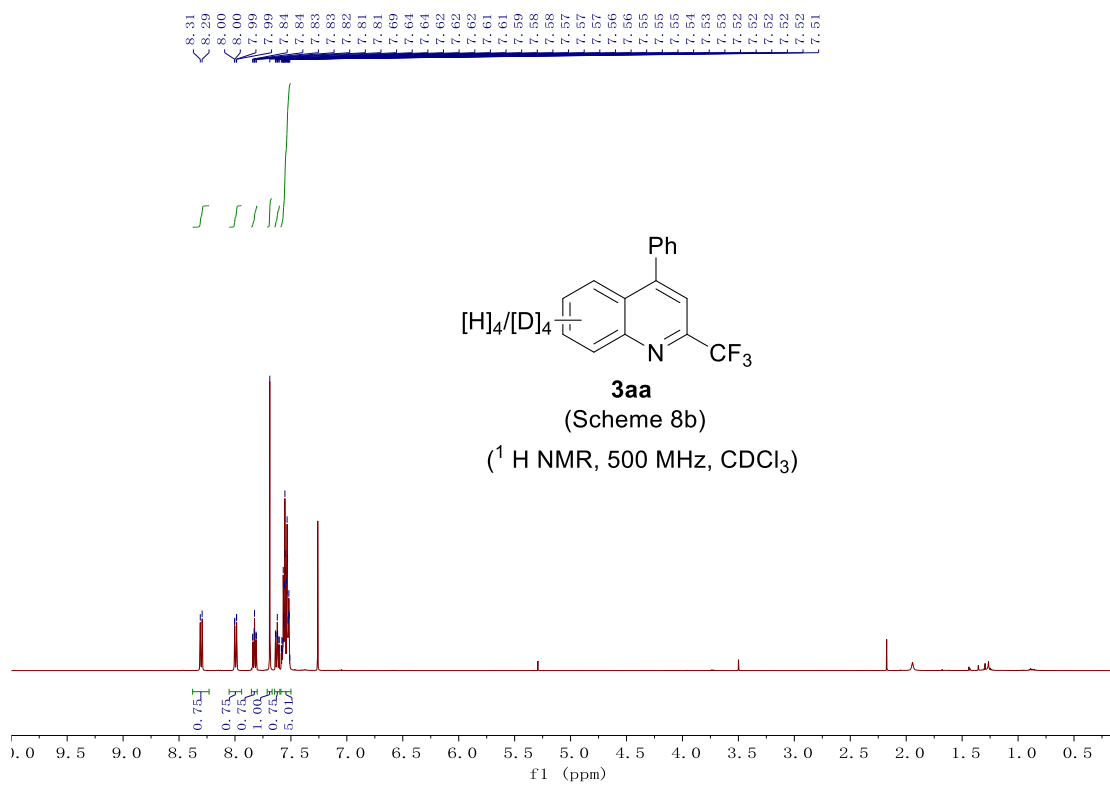

## 9. X-ray crystallographic analysis

Single crystals suitable for X-ray diffraction experiment were obtained by slow evaporation of *n*-hexane/acetone solution containing the corresponding compounds **3aa** and **10**.

**Table S2.** Crystal data and structure refinement for Exp\_10398 (**3aa**)

|                                                       |                                                              |
|-------------------------------------------------------|--------------------------------------------------------------|
| Identification code                                   | exp_10398                                                    |
| Empirical formula                                     | C <sub>16</sub> H <sub>10</sub> F <sub>3</sub> N             |
| Formula weight                                        | 273.25                                                       |
| Temperature/K                                         | 293.00(10)                                                   |
| Crystal system                                        | monoclinic                                                   |
| Space group                                           | P 1 21/c 1                                                   |
| <i>a</i> /Å                                           | 8.8679(15)                                                   |
| <i>b</i> /Å                                           | 14.9200(17)                                                  |
| <i>c</i> /Å                                           | 10.3319(13)                                                  |
| $\alpha$ /°                                           | 90                                                           |
| $\beta$ /°                                            | 103.788(16)                                                  |
| $\gamma$ /°                                           | 90.00                                                        |
| Volume/Å <sup>3</sup>                                 | 1327.6(3)                                                    |
| <i>Z</i>                                              | 4                                                            |
| $\rho_{\text{calc}}$ /cm <sup>3</sup>                 | 1.367                                                        |
| $\mu$ /mm <sup>-1</sup>                               | 0.110                                                        |
| F(000)                                                | 560                                                          |
| Crystal size/mm <sup>3</sup>                          | 0.36 × 0.35 × 0.08                                           |
| Radiation                                             | MoK $\alpha$ ( $\lambda$ = 0.71073)                          |
| Index ranges                                          | -11 ≤ <i>h</i> ≤ 11, -19 ≤ <i>k</i> ≤ 19, -9 ≤ <i>l</i> ≤ 13 |
| Reflections collected                                 | 5807                                                         |
| Independent reflections                               | 3050 [R(int) = 0.0646]                                       |
| Data/restraints/parameters                            | 3050/39/208                                                  |
| Goodness-of-fit on F <sup>2</sup>                     | 0.965                                                        |
| Final R indexes [ <i>I</i> ≥ 2 $\sigma$ ( <i>I</i> )] | R <sub>1</sub> = 0.0636, wR <sub>2</sub> = 0.1341            |
| Final R indexes [all data]                            | R <sub>1</sub> = 0.1358, wR <sub>2</sub> = 0.1822            |
| Largest diff. peak/hole / e Å <sup>-3</sup>           | 0.236/-0.309                                                 |

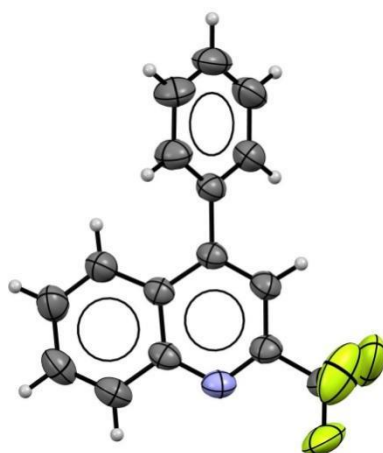

**Figure S1.** ORTEP plots for molecular structure of **3aa** with the probability at 50% Level

**Table S3.** Crystal data and structure refinement for Exp\_10046 (**10**)

|                                             |                                                   |
|---------------------------------------------|---------------------------------------------------|
| Identification code                         | exp_10046                                         |
| Empirical formula                           | C <sub>18</sub> H <sub>15</sub> NO <sub>2</sub>   |
| Formula weight                              | 277.31                                            |
| Temperature/K                               | 296.01(10)                                        |
| Crystal system                              | monoclinic                                        |
| Space group                                 | P1 21/c 1                                         |
| a/Å                                         | 8.3362(8)                                         |
| b/Å                                         | 12.0976(8)                                        |
| c/Å                                         | 14.4307(11)                                       |
| α/°                                         | 90                                                |
| β/°                                         | 92.893(8)                                         |
| γ/°                                         | 90.00                                             |
| Volume/Å <sup>3</sup>                       | 1453.5(2)                                         |
| Z                                           | 4                                                 |
| ρ <sub>calc</sub> /g/cm <sup>3</sup>        | 1.267                                             |
| μ/mm <sup>-1</sup>                          | 0.083                                             |
| F(000)                                      | 584                                               |
| Crystal size/mm <sup>3</sup>                | 0.30 × 0.26 × 0.22                                |
| Radiation                                   | MoKα (λ = 0.71073)                                |
| 2θ range for data collection/°              | 3.65 to 29.08                                     |
| Index ranges                                | -11 ≤ h ≤ 7, -16 ≤ k ≤ 10, -19 ≤ l ≤ 19           |
| Reflections collected                       | 6737                                              |
| Independent reflections                     | 3369 [R(int) = 0.0322]                            |
| Data/restraints/parameters                  | 3369/0/193                                        |
| Goodness-of-fit on F <sup>2</sup>           | 1.033                                             |
| Final R indexes [I ≥ 2σ (I)]                | R <sub>1</sub> = 0.0679, wR <sub>2</sub> = 0.1256 |
| Final R indexes [all data]                  | R <sub>1</sub> = 0.1297, wR <sub>2</sub> = 0.1542 |
| Largest diff. peak/hole / e Å <sup>-3</sup> | 0.147/-0.169                                      |

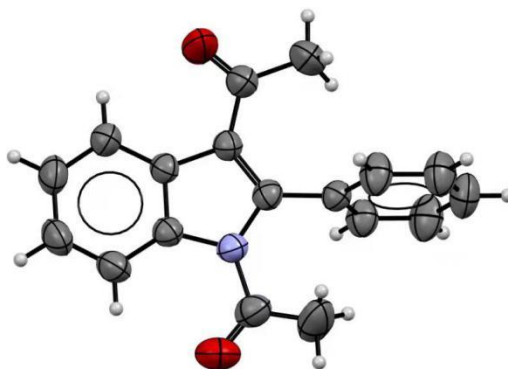

**Figure S2.** ORTEP plots for molecular structure of **5** with the probability at 50% Level

### 10. Photophysical data of compounds **3oa** and **3pa**

**Table S4.** Photophysical data of compounds **3oa** and **3pa**

| Compounds  | $\lambda_{\text{ex}}$ (nm) <sup>a</sup> in DCM | $\lambda_{\text{em}}$ (nm) <sup>a</sup> in DCM | $(\Phi_f)$ <sup>b</sup> in DCM |
|------------|------------------------------------------------|------------------------------------------------|--------------------------------|
| <b>3oa</b> | 339                                            | 429                                            | 86                             |
| <b>3pa</b> | 339                                            | 418                                            | 12                             |

<sup>a</sup>Excitation maximum in DCM. <sup>b</sup>Exmission maximum in DCM. <sup>c</sup>The quantum yield determined in DCM relative to 55% of quinine sulfate.<sup>9</sup>

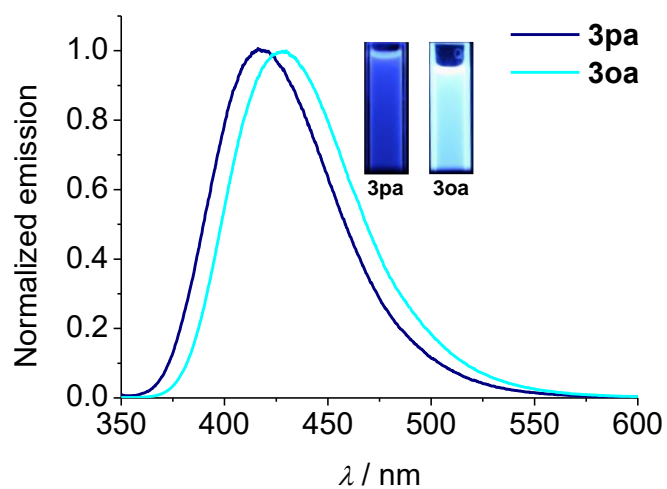

**Figure S3.** Normalized emission spectra of representative compounds **3oa** and **3pa** with a concentration of  $10^{-5}$  M in  $\text{CH}_2\text{Cl}_2$  on excitation at 339 nm. Inset: images of compounds **3oa** and **3pa** under a UV lamp (365 nm).

## 11. Reference

- 1 (a) P. Patel and G. Borah, Synthesis of oxindole from acetanilide via Ir(III)-catalyzed C–H carbenoid functionalization, *Chem. Commun.*, 2017, **53**, 443-446; (b) D. C. Simkó, P. Elekes, V. Pázmándi and Z. Novák, Sulfonium salts as alkylating agents for palladium-catalyzed direct ortho alkylation of anilides and aromatic ureas, *Org. Lett.*, 2018, **20**, 676-679.
- 2 J. A. Leitch, C. L. McMullin, A. J. Paterson, M. F. Mahon, Y. Bhonoah and C. G. Frost, Ruthenium-catalyzed para-selective C–H alkylation of aniline derivatives, *Angew. Chem. Int. Ed.*, 2017, **56**, 15131-15135.
- 3 S. W. Youn and Y. H. Kim, Pd(II)/Ag(I)-promoted one-pot synthesis of cyclic ureas from (hetero)aromatic amines and isocyanates, *Org. Lett.*, 2016, **18**, 6140-6143.
- 4 B. M. Trost, C.-I. Hung and M. J. Scharf, Direct catalytic asymmetric vinylogous additions of  $\alpha,\beta$ - and  $\beta,\gamma$ -butenolides to polyfluorinated alkynyl ketimines, *Angew. Chem. Int. Ed.*, 2018, **57**, 11408-11412.
- 5 J. Nan, Y. Hu, P. Chen and Y. Ma, Metal-free synthesis of 2-fluoroalkylated quinolines using polyfluoroalkanoic acids as direct fluorine sources, *Org. Lett.*, 2019, **21**, 1984-1988.
- 6 Q.-W. Pan, J.-H. Wang, Q. Wang, H.-J. Li and Y.-C. Wu, Synthesis of 2-trifluoromethyl quinolines from  $\alpha,\beta$ -unsaturated trifluoromethyl ketones: regiochemistry reversal comparing to the standard Skraup-Doebner-von Miller synthesis, *ChemistrySelect*, 2020, **5**, 4099-4103.
- 7 M. Zhu, W. Fu, G. Zou, C. Xun, D. Deng and B. Ji, An efficient synthesis of 2-trifluoromethyl quinolines via gold-catalyzed cyclization of trifluoromethylated propargylamines, *J. Fluorine Chem.*, 2012, **135**, 195-199.
- 8 X. Dong, Y. Xu, J. J. Liu, Y. Hu, T. Xiao and L. Zhou, Visible-light-induced radical cyclization of trifluoroacetimidoyl chlorides with alkynes: catalytic synthesis of 2-trifluoromethyl quinolines, *Chem.-Eur. J.*, 2013, **19**, 16928-16933.
- 9 A. N. Fletcher, Quinine sulfate as a fluorescence quantum yield standard, *Photochem. Photobiol.*, 1969, **9**, 439-444.
